# Supplementary material for: Chiral proline-substituted porous organic cages in asymmetric organocatalysis
Source: Royal Society of Chemistry journal article supplement (doi:10.1039/d2sc00395c), 2022-01-01
Supplement: d2sc00395c1.pdf [file d2sc00395c1.pdf]

## SUPPORTING INFORMATION

---

# Supporting Information

## Chiral Proline-Substituted Porous Organic Cages in Asymmetric Organocatalysis

Ning Xu,<sup>[a]</sup> Kongzhao Su,<sup>[a,b]</sup> El-Sayed M. El-Sayed,<sup>[a,b,d]</sup> Zhanfeng Ju,<sup>[a]</sup> and Daqiang Yuan\*<sup>[a,b,c]</sup>

<sup>a</sup>. State Key Laboratory of Structural Chemistry, Fujian Institute of Research on the Structure of Matter, Chinese Academy of Sciences, Fuzhou, 350002, Fujian, China.

<sup>b</sup>. University of the Chinese Academy of Sciences, Beijing, 100049, China

<sup>c</sup>. Fujian Science and Technology Innovation Laboratory for Optoelectronic Information of China, Fuzhou, 350002, Fujian, China.

<sup>d</sup>. Chemical Refining Laboratory, Refining Department, Egyptian Petroleum Research Institute, Nasr City, 11727, Egypt.

Corresponding author: [ydq@fjirsm.ac.cn](mailto:ydq@fjirsm.ac.cn)

### Table of Contents

|                                                                                    |    |
|------------------------------------------------------------------------------------|----|
| 1. General Materials and Measurements .....                                        | 3  |
| 2. Experimental Procedures.....                                                    | 3  |
| 2.1 Synthesis of the chiral proline-decorated diamine ligands .....                | 3  |
| 2.2 Synthesis and characterization of the two chiral POCs .....                    | 6  |
| 2.3 Catalytic activity test of the synthesized chiral POCs .....                   | 18 |
| 2.4 2D NOESY experiments.....                                                      | 36 |
| 2.5 Size selectivity study of CPOC-302-Pro .....                                   | 40 |
| 2.6 Catalytic recycle test of CPOC-302-Pro.....                                    | 41 |
| 2.7 <sup>1</sup> H and <sup>13</sup> C NMR Spectra of the precursor molecular..... | 43 |
| 3. Single Crystal Determination and Results .....                                  | 51 |
| 4. Geometry Optimized Models .....                                                 | 53 |
| 5. References .....                                                                | 53 |

## SUPPORTING INFORMATION

### 1. General Materials and Measurements

Commercially available reagents were used as received without further purification. Most reagent-grade chemicals were obtained from Adamas Reagent, Ltd. C4RACHO was synthesized according to the procedure in the literature. All the reagent-grade chemicals were commercially available and used directly. FT-IR spectra were collected on KBr pellets in the 4000-400  $\text{cm}^{-1}$  range using a VERTEX70 spectrometer.  $^1\text{H}$  NMR spectra were recorded on a Bruker Avance 400 spectrometer. High-resolution ESI-TOF-MS spectra were obtained on a MaXis™ 4G instrument from Bruker. Thermogravimetric analyses (TGA) were measured on a NETZSCH STA 449C unit at a heating rate of  $10\text{ }^\circ\text{C min}^{-1}$  under a nitrogen atmosphere. Circular dichroism (CD) spectra were recorded with a Bio-logic MOS-450 CD Spectrometer at room temperature. Powder X-ray diffraction (PXRD) data were collected on a PANalytical B.V. Empyrean powder diffractometer using a  $\text{Cu K}\alpha$  source ( $\lambda = 1.5418\text{ \AA}$ ) over the range of  $2\theta = 2.0\text{--}40.0^\circ$  with a step size of  $0.02^\circ$  and 2 s per step and MiniFlex 600 spectrometer using  $\text{Cu K}\alpha$  radiation over the range of  $2\theta = 4.0\text{--}50.0^\circ$  with a step size of  $0.02^\circ$  and 2 s per step. Elemental analysis (C, H, N) was performed on an Elementar Vario MICRO elemental analyzer. The sorption isotherm for  $\text{N}_2$  was measured using a Micromeritics ASAP 2020 plus analyzer with ultra-high-purity  $\text{N}_2$  (99.999% purity) at liquid nitrogen temperature (77 K).

### 2. Experimental Procedures

#### 2.1 Synthesis of the chiral proline-decorated diamine ligands

##### 2.1.1 Synthesis of (S)-N-(3,5-diaminophenyl)pyrrolidine-2-carboxamide (A3)

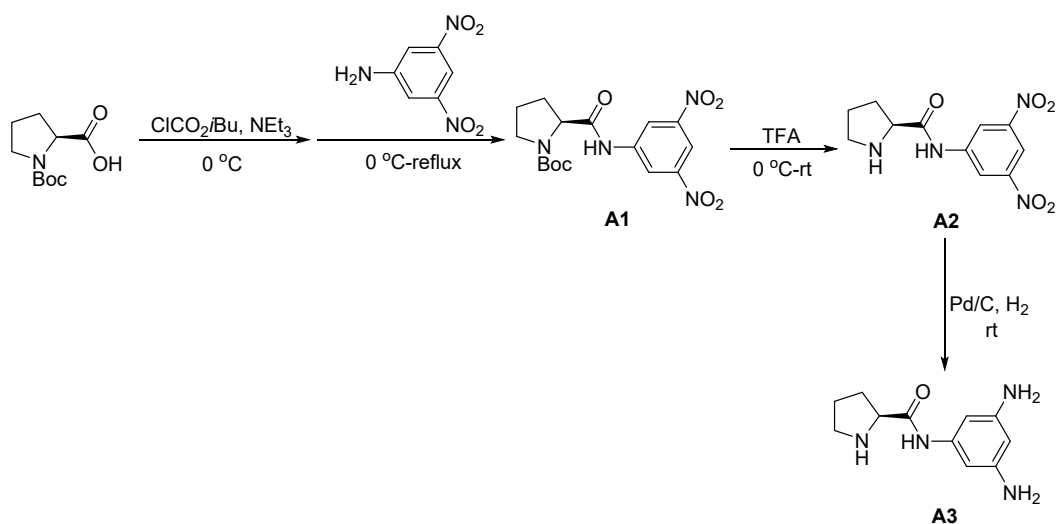

**Scheme S1.** Synthetic route of (S)-N-(3,5-diaminophenyl)pyrrolidine-2-carboxamide.

To a solution of Boc-L-proline (1.27 g, 5.9 mmol) in 20 mL dry THF was added triethylamine (0.82 mL, 5.9 mmol) under argon atmosphere. After the mixture was cooled to  $0\text{ }^\circ\text{C}$ , isobutyl chloroformate (0.78 mL, 6.0 mmol) was added dropwise followed by stirring for 1 h. After that, 2,4-dinitroaniline (0.99 g, 5.4 mmol) was added to the solution in small portions. The resulting mixture was stirred at  $0\text{ }^\circ\text{C}$  for 1 h, at room temperature for 2 h, and then heated at reflux for 24 h. Upon cooling down, the mixture was filtered and the filtrate was concentrated. The residue was purified by column chromatography with dichloromethane as the

## SUPPORTING INFORMATION

eluent to give compound **A1** as light yellow oil in 85% yield.  $^1\text{H}$  NMR (400 MHz,  $\text{CDCl}_3$ ):  $\delta$  (ppm)= 10.62 (s, 1H), 8.67 (s, 2H), 8.61 (s, 1H), 4.58 (s, 1H), 3.43-3.57 (m, 2H), 2.45 (s, 1H), 1.98-2.05 (m, 3H), 1.57 (s, 9H).  $^{13}\text{C}$  NMR (100 MHz,  $\text{CDCl}_3$ ):  $\delta$  (ppm)= 171.72, 155.88, 148.11, 140.85, 118.16, 112.04, 81.38, 60.46, 47.31, 29.30, 28.31, 24.26. Anal. calcd (%): C, 50.53; H, 5.30; N, 14.73. Found (%): C, 50.45; H, 5.38; N, 14.76. IR (KBr,  $\text{cm}^{-1}$ )  $\nu$  3099, 2980, 1657, 1535, 1420, 1344, 1163, 1135, 899, 813, 772, 727. ESI-TOF-MS: calcd. for  $\text{C}_{16}\text{H}_{20}\text{N}_4\text{NaO}_7$   $[\text{M}+\text{Na}]^+$  403.1224, found 403.1212.

The above product **A1** (1.9 g, 5.0 mmol) was dissolved in dry dichloromethane (30 mL) and cooled to 0 °C. Then, trifluoroacetic acid (15 mL) was slowly added to the solution. The mixture was stirred at room temperature for two days and concentrated under reduced pressure. Dichloromethane (10 mL) and  $\text{H}_2\text{O}$  (10 mL) were added, the resulting mixture was basified with  $\text{NH}_4\text{OH}$  and extracted with dichloromethane (3  $\times$  50 mL). The obtained organic layer was collected, washed with brine, and dried over anhydrous  $\text{MgSO}_4$ . After removing the organic solvent under reduced pressure, the residue was purified by column chromatography with dichloromethane/ethyl acetate (3/1, v/v) as the eluent to afford compound **A2** as light yellow solids in 90% yield.  $^1\text{H}$  NMR (400 MHz,  $\text{CDCl}_3$ ):  $\delta$  (ppm)= 10.51 (s, 1H), 8.87 (s, 2H), 8.71 (s, 1H), 3.94-3.98 (m, 1H), 3.13-3.19 (m, 1H), 3.00-3.06 (m, 1H), 2.23-2.30 (m, 2H), 1.79-1.84 (m, 2H).  $^{13}\text{C}$  NMR (100 MHz,  $\text{CDCl}_3$ ):  $\delta$  (ppm)= 174.52, 148.70, 140.17, 118.68, 113.08, 60.80, 47.36, 30.67, 26.30.

Compound **A2** (1.4 g, 5.0 mmol), 5% Pd/C (1.0 g) and dry THF (30 mL) were mixed in a 100 mL round bottom flask. After vacuumized and refilled with  $\text{H}_2$  for three times, the mixture was stirred at room temperature for two days. After that, the reaction mixture was filtered through Celite and the filtrate was concentrated to give the product **A3** as white solids in 92% yield, mp: 125.4-127.1 °C;  $^1\text{H}$  NMR (400 MHz,  $\text{DMSO}-d_6$ ):  $\delta$  (ppm)= 9.41 (s, 1H), 6.09 (d, 2H), 5.54 (s, 1H), 4.70 (s, 4H), 3.56-3.60 (m, 1H), 2.79-2.90 (m, 2H), 1.95-2.04 (m, 1H), 1.67-1.76 (m, 1H), 1.58-1.64 (m, 2H).  $^{13}\text{C}$  NMR (100 MHz,  $\text{DMSO}-d_6$ ):  $\delta$  (ppm)= 172.95, 149.88, 139.75, 96.33, 94.81, 61.24, 47.26, 30.99, 26.48. Anal. calcd (%): C, 59.98; H, 7.32; N, 25.44. Found (%): C, 59.95; H, 7.38; N, 25.46. IR (KBr,  $\text{cm}^{-1}$ )  $\nu$  3366, 3303, 3217, 2958, 1666, 1611, 1534, 1493, 1452, 1185, 1080, 922, 835, 712, 681. ESI-TOF-MS: calcd. for  $\text{C}_{11}\text{H}_{16}\text{N}_4\text{O}$   $[\text{M}+\text{H}]^+$  221.1397, found 221.1384.

### 2.1.2 Synthesis of (S)-N-(4,4'-diamino-[1,1'-biphenyl]-2-yl)pyrrolidine-2-carboxamide (B3)

## SUPPORTING INFORMATION

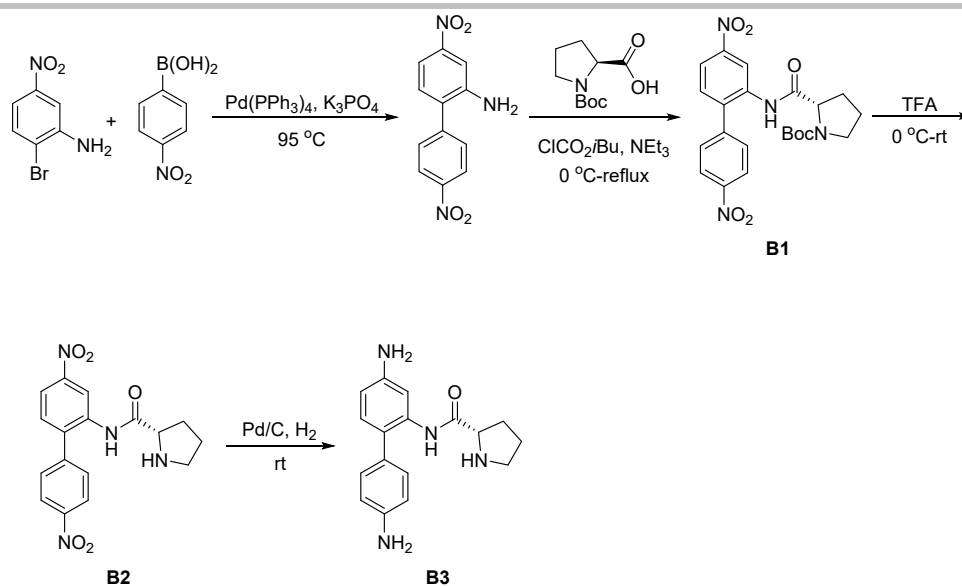

**Scheme S2.** Synthetic route of (S)-N-(4,4'-diamino-[1,1'-biphenyl]-2-yl)pyrrolidine-2-carboxamide.

2-Bromo-5-nitroaniline (2.17 g, 10.0 mmol), 4-nitrophenylboronic acid (1.67 g, 10.0 mmol), Pd(PPh<sub>3</sub>)<sub>4</sub> (0.58 g, 0.5 mmol) and K<sub>3</sub>PO<sub>4</sub> (6.37 g, 30.0 mmol) were mixed in a 200 mL Schlenk flask. After vacuumed and refilled with argon for three times, toluene-water-ethanol (30 ml, 20 ml, 10 ml) was added. The mixture was stirred at 95 °C for 24 h and then cooled to room temperature. The organic phase was separated and the aqueous phase was extracted with dichloromethane (3 × 50 mL). The combined organic phases were washed with brine, and dried over anhydrous MgSO<sub>4</sub>. The solvent was evaporated under reduced pressure and purified by column chromatography with petroleum ether/dichloromethane (1/1, v/v) as eluent to afford 4,4'-dinitro-[1,1'-biphenyl]-2-amine in 90% yield. <sup>1</sup>H NMR (400 MHz, DMSO-*d*<sub>6</sub>): δ (ppm)= 8.33 (d, 2H), 7.75 (d, 2H), 7.65 (d, 1H), 7.43-7.46 (m, 1H), 7.29 (d, 1H), 5.75 (s, 2H). <sup>13</sup>C NMR (100 MHz, DMSO-*d*<sub>6</sub>): δ (ppm)= 148.82, 147.34, 147.25, 145.23, 131.81, 130.53, 129.64, 124.55, 111.00, 109.70.

To a solution of Boc-L-proline (1.27 g, 5.9 mmol) in 20 mL dry THF was added triethylamine (0.82 mL, 5.9 mmol) under argon atmosphere. After the mixture was cooled to 0 °C, isobutyl chloroformate (0.78 mL, 6.0 mmol) was added dropwise followed by stirring for 1 h. Subsequently, 4,4'-dinitro-[1,1'-biphenyl]-2-amine (1.4 g, 5.4 mmol) was added to the solution in small portions. The resulting mixture was stirred at 0 °C for 1 h, at room temperature for 2 h, and then heated at reflux for 24 h. After cooling, the mixture was filtered and the filtrate was concentrated. The residue was purified by column chromatography with dichloromethane as the eluent to give compound **B1** as light yellow solids in 80% yield, mp: 62.5-63.4 °C; <sup>1</sup>H NMR (400 MHz, CDCl<sub>3</sub>): δ (ppm)= 9.39 (s, 1H), 9.23 (s, 1H), 8.38 (d, 2H), 8.05 (d, 1H), 7.57 (d, 2H), 7.40 (d, 1H), 4.30 (d, 1H), 3.24 (s, 2H), 2.48 (s, 1H), 1.88 (s, 3H), 1.31 (s, 9H). <sup>13</sup>C NMR (100 MHz, CDCl<sub>3</sub>): δ (ppm)= 172.99, 153.57, 147.93, 147.68, 142.97, 136.33, 136.21, 130.48, 129.96, 124.06, 118.69, 116.57, 80.61, 70.66, 47.01, 30.64, 27.88, 23.29. Anal. calcd (%): C, 57.89; H, 5.30; N, 12.27. Found (%): C, 57.94; H, 5.21; N, 12.24. IR (KBr, cm<sup>-1</sup>) ν 2976, 1693, 1592, 1521, 1389, 1338, 1303, 1158, 1086, 8564, 741, 695. ESI-TOF-MS: calcd. for C<sub>22</sub>H<sub>24</sub>N<sub>4</sub>NaO<sub>7</sub> [M+Na]<sup>+</sup> 479.1537, found 479.1539.

To a solution of **B1** (2.74 g, 6.0 mmol) in dry dichloromethane (40 mL) at 0 °C was added trifluoroacetic acid (25 mL). The mixture was stirred at room temperature for two days and concentrated under reduced

## SUPPORTING INFORMATION

pressure. After the addition of dichloromethane (10 mL) and H<sub>2</sub>O (10 mL), the resulting mixture was basified with NH<sub>4</sub>OH and extracted with dichloromethane (3 × 50 mL). The combined organic layer was washed with brine, dried over anhydrous MgSO<sub>4</sub>, and then concentrated to dryness. The crude product was purified by chromatography on silica gel with dichloromethane/ethyl acetate (3/1, v/v) as the eluent to afford compound **B2** as white solids in 85% yield, mp: 95.3-96.9 °C; <sup>1</sup>H NMR (400 MHz, CDCl<sub>3</sub>): δ (ppm)= 10.21 (s, 1H), 9.37 (d, 1H), 8.40 (d, 2H), 8.03-8.06 (m, 1H), 7.60 (d, 2H), 7.41 (d, 1H), 3.80-3.84 (m, 1H), 2.88-2.94 (m, 1H), 2.55-2.60 (m, 1H), 2.12-2.19 (m, 1H), 1.99-2.05 (m, 1H), 1.59-1.75 (m, 2H). <sup>13</sup>C NMR (100 MHz, CDCl<sub>3</sub>): δ (ppm)= 173.85, 148.31, 147.81, 143.13, 135.97, 135.35, 130.39, 130.09, 124.09, 118.45, 115.31, 60.82, 47.09, 30.56, 26.15. Anal. calcd (%): C, 57.30; H, 4.53; N, 15.72. Found (%): C, 57.33; H, 4.54; N, 15.62. IR (KBr, cm<sup>-1</sup>) ν 3122, 2867, 1698, 1598, 1512, 1452, 1344, 1081, 904, 855, 732, 700, 614. ESI-TOF-MS: calcd. for C<sub>17</sub>H<sub>16</sub>N<sub>4</sub>O<sub>5</sub> [M+H]<sup>+</sup> 357.1154, found 357.1191.

Compound **B2** (1.78 g, 5.0 mmol), 5% Pd/C (1.2 g) and dry THF (40 mL) were mixed in a 100 mL round bottom flask. After vacuumized and refilled with H<sub>2</sub> for three times, the mixture was stirred at room temperature for two days. After that, the reaction mixture was filtered through Celite and the filtrate was concentrated to give the product **B3** as white solids in 96% yield, mp: 83.2-84.6 °C; <sup>1</sup>H NMR (400 MHz, DMSO-*d*<sub>6</sub>): δ (ppm)= 10.07 (s, 1H), 7.72 (d, 1H), 7.03 (d, 2H), 6.90 (d, 1H), 6.71 (d, 2H), 6.39-6.41 (m, 1H), 5.20 (d, 4H), 3.67-3.72 (m, 1H), 2.85-2.91 (m, 1H), 2.65-2.71 (m, 1H), 2.01-2.08 (m, 1H), 1.85-1.90 (m, 1H), 1.61-1.70 (m, 2H). <sup>13</sup>C NMR (100 MHz, DMSO-*d*<sub>6</sub>): δ (ppm)= 173.18, 148.19, 147.85, 135.75, 130.80, 130.21, 126.25, 120.90, 114.52, 110.09, 105.76, 61.16, 46.96, 31.02, 26.24. Anal. calcd (%): C, 68.90; H, 6.80; N, 18.90. Found (%): C, 68.85; H, 6.88; N, 18.93. IR (KBr, cm<sup>-1</sup>) ν 3438, 3343, 3216, 2967, 2866, 1665, 1606, 1511, 1470, 1288, 1243, 1180, 812, 556. ESI-TOF-MS: calcd. for C<sub>17</sub>H<sub>20</sub>N<sub>4</sub>O [M+H]<sup>+</sup> 297.1710, found 297.1690.

### 2.1.3 Synthesis of (S)-N-([1,1'-biphenyl]-2-yl)pyrrolidine-2-carboxamide (BPP)

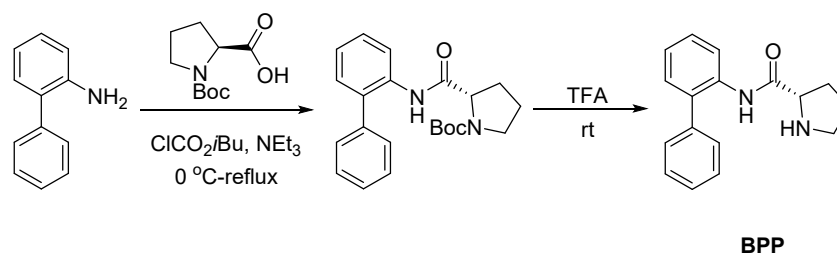

**Scheme S3.** Synthetic route of (S)-N-([1,1'-biphenyl]-2-yl)pyrrolidine-2-carboxamide (BPP).

The model catalyst BPP was synthesized followed the synthetic route similar to compound **B2** as white solids in 86% total yield. <sup>1</sup>H NMR (400 MHz, CDCl<sub>3</sub>): δ (ppm)= 9.95 (s, 1H), 8.42 (d, 1H), 7.46 (t, 2H), 7.35-7.41 (m, 4H), 7.24-7.26 (m, 1H), 7.15 (t, 1H), 3.74-3.77 (m, 1H), 2.80-2.86 (m, 1H), 2.55-2.61 (m, 1H), 2.05-2.14 (m, 1H), 1.94-2.02 (m, 1H), 1.54-1.67 (m, 2H). <sup>13</sup>C NMR (100 MHz, CDCl<sub>3</sub>): δ (ppm)= 173.48, 138.39, 134.91, 132.22, 129.83, 129.25, 128.53, 128.24, 127.48, 123.71, 120.24, 60.84, 46.89, 30.75, 25.91. ESI-TOF-MS: calcd. for C<sub>17</sub>H<sub>18</sub>N<sub>2</sub>O [M+H]<sup>+</sup> 267.1492, found 267.1472.

## SUPPORTING INFORMATION

### 2.2 Synthesis and characterization of the two chiral POCs

#### 2.2.1 Synthesis of CPOC-401-Pro

(S)-N-(3,5-diaminophenyl)pyrrolidine-2-carboxamide (**A3**) (0.08 mmol, 17.6 mg) and C4RACHO (0.04 mmol, 33 mg) were added into  $\text{CHCl}_3$  (6 mL) and stirred at 65 °C for 1 day. After cooling to room temperature, Bromobenzene (1.5 mL) was added and slow vapor diffusion of MeOH into the mixture was conducted for two weeks. Red block single crystals of CPOC-401-Pro were obtained in ~52% yield and washed with MeOH. (mp >400 °C).  $^1\text{H}$  NMR (400 MHz,  $\text{CDCl}_3$ ):  $\delta$  (ppm)= 16.05 (s, 1H), 10.73 (s, 1H), 10.01 (s, 0.5H), 9.27 (d, 1H), 7.12-7.34 (m, 2.5H), 4.64 (s, 1H), 3.82 (s, 0.5H), 3.04 (s, 1H), 2.05-2.15 (m, 3H), 1.58 (s, 1H), 1.74 (s, 1H), 1.04 (t, 6H). Anal. calcd (%): C, 70.45; H, 6.76; N, 9.39. Found (%): C, 70.21; H, 6.88; N, 9.41. IR (KBr,  $\text{cm}^{-1}$ )  $\nu$  2953, 2926, 2867, 1620, 1579, 1452, 1293, 1211, 994, 858, 798, 681. ESI-TOF-MS: calcd. for CPOC-401-Pro ( $\text{C}_{280}\text{H}_{320}\text{N}_{32}\text{O}_{40}$ )  $[\text{M}+5\text{H}]^{5+}$  955.6889, found 955.6886.

#### 2.2.2 Synthesis of CPOC-302-Pro

(S)-N-(4,4'-diamino-[1,1'-biphenyl]-2-yl)pyrrolidine-2-carboxamide (**B3**) (0.10 mmol, 29.6 mg) and C4RACHO (0.05 mmol, 41.2 mg) were added into PhCl (6 mL) and stirred at 100 °C for 12 h. After cooling to room temperature, slow vapor diffusion of MeOH into the mixture was conducted for one week. Red block single crystals of CPOC-302-Pro were obtained in ~65% yield and washed with MeOH. (mp >400 °C).  $^1\text{H}$  NMR (400 MHz,  $\text{CDCl}_3$ ):  $\delta$  (ppm)= 16.17 (s, 1H), 10.19 (s, 1H), 9.18 (s, 1H), 8.49 (s, 0.5H), 7.13-7.42 (m, 4.5H), 4.67 (s, 1H), 3.76 (s, 0.5H), 2.95 (s, 0.5H), 2.69 (s, 0.5H), 1.61-2.11 (m, 5H), 1.06 (s, 6H). Anal. calcd (%): C, 73.19; H, 6.59; N, 8.33. Found (%): C, 73.22; H, 6.46; N, 8.19. IR (KBr,  $\text{cm}^{-1}$ )  $\nu$  2955, 2922, 2863, 1621, 1574, 1525, 1502, 1453, 1294, 1202, 1094, 1003, 799, 748. ESI-TOF-MS: calcd. for CPOC-302-Pro ( $\text{C}_{492}\text{H}_{528}\text{N}_{48}\text{O}_{60}$ )  $[\text{M}+5\text{H}]^{5+}$  1615.6052, found 1615.6061;  $[\text{M}+6\text{H}]^{6+}$  1346.5056, found 1346.5064;  $[\text{M}+7\text{H}]^{7+}$  1154.2915, found 1154.2905.

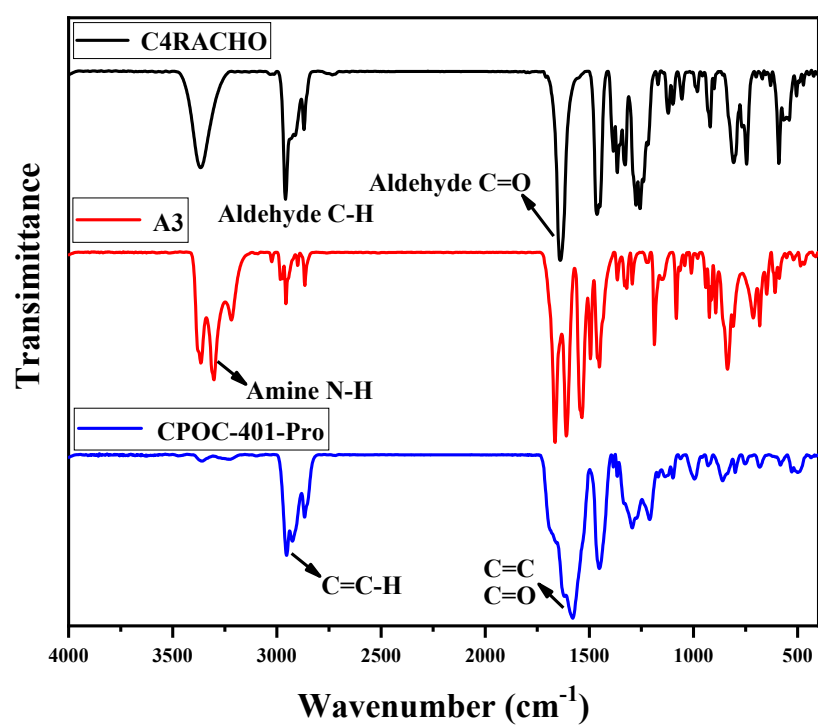

**Figure S1.** FT-IR spectra of C4RACHO, A3 and CPOC-401-Pro.



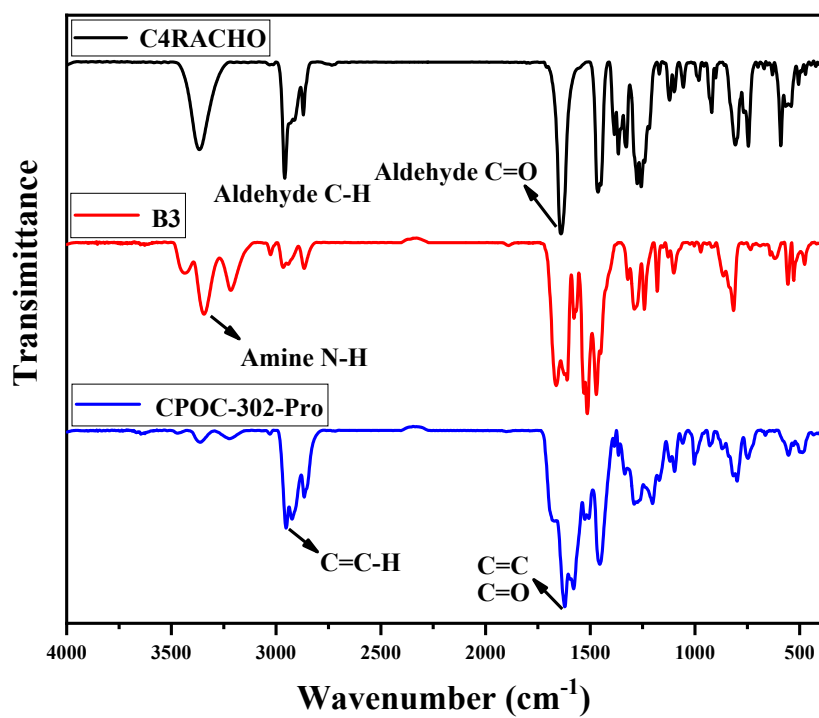

Figure S2. FT-IR spectra of C4RACHO, B3 and CPOC-302-Pro.

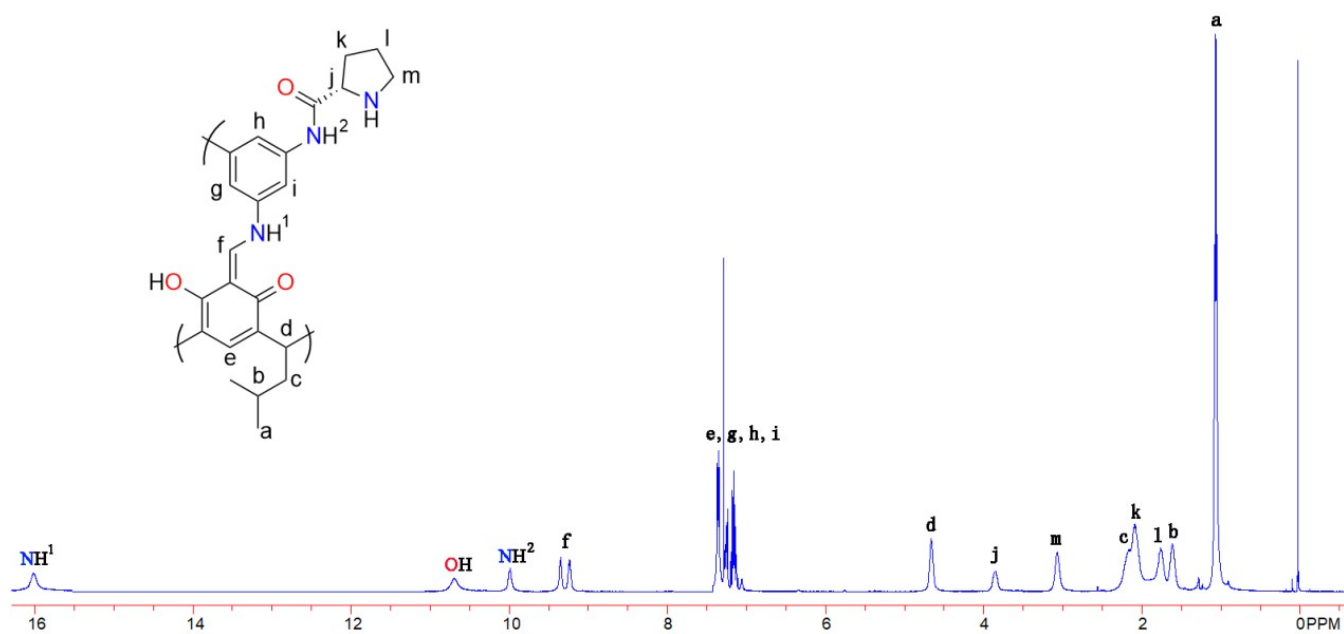

Figure S3. <sup>1</sup>H NMR of CPOC-401-Pro (CDCl<sub>3</sub>, 400 MHz).

# SUPPORTING INFORMATION

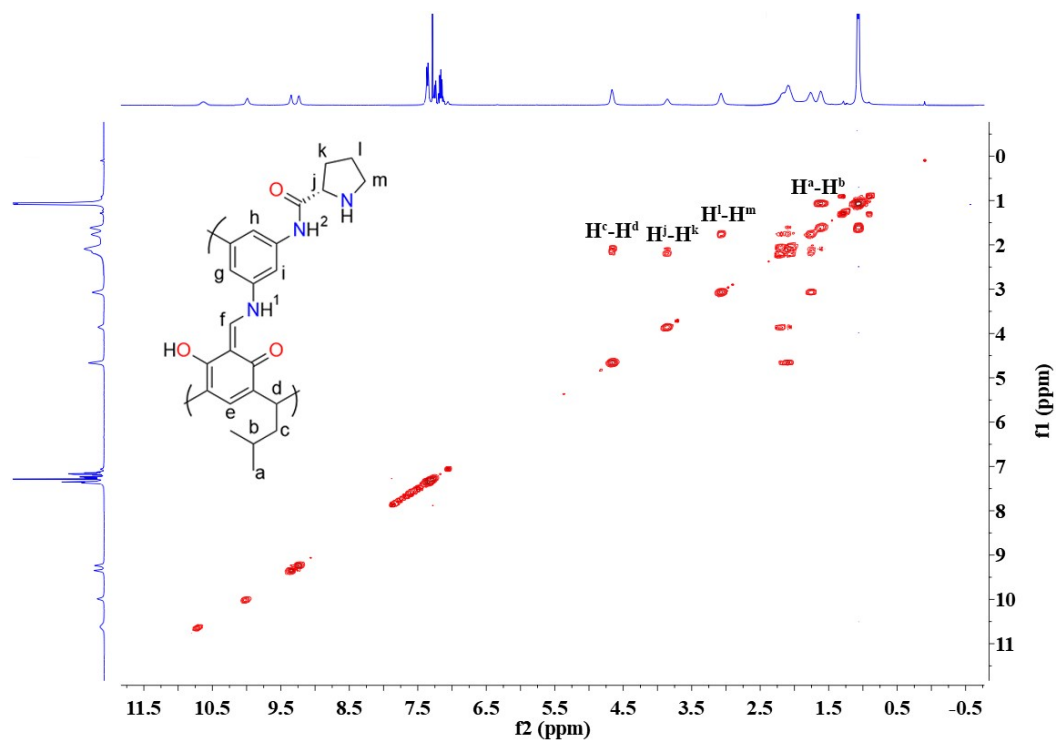

**Figure S4.**  $^1\text{H}$ - $^1\text{H}$  COSY NMR Spectrum of CPOC-401-Pro recorded in  $\text{CDCl}_3$ .

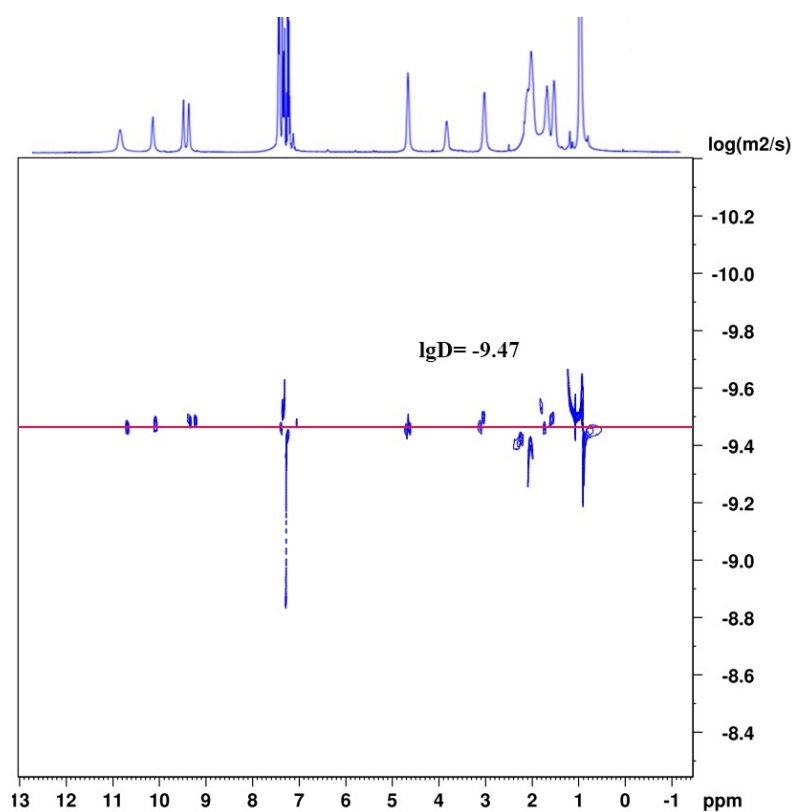

**Figure S5.**  $^1\text{H}$  DOSY NMR spectrum of CPOC-401-Pro recorded in  $\text{CDCl}_3$ .

## SUPPORTING INFORMATION

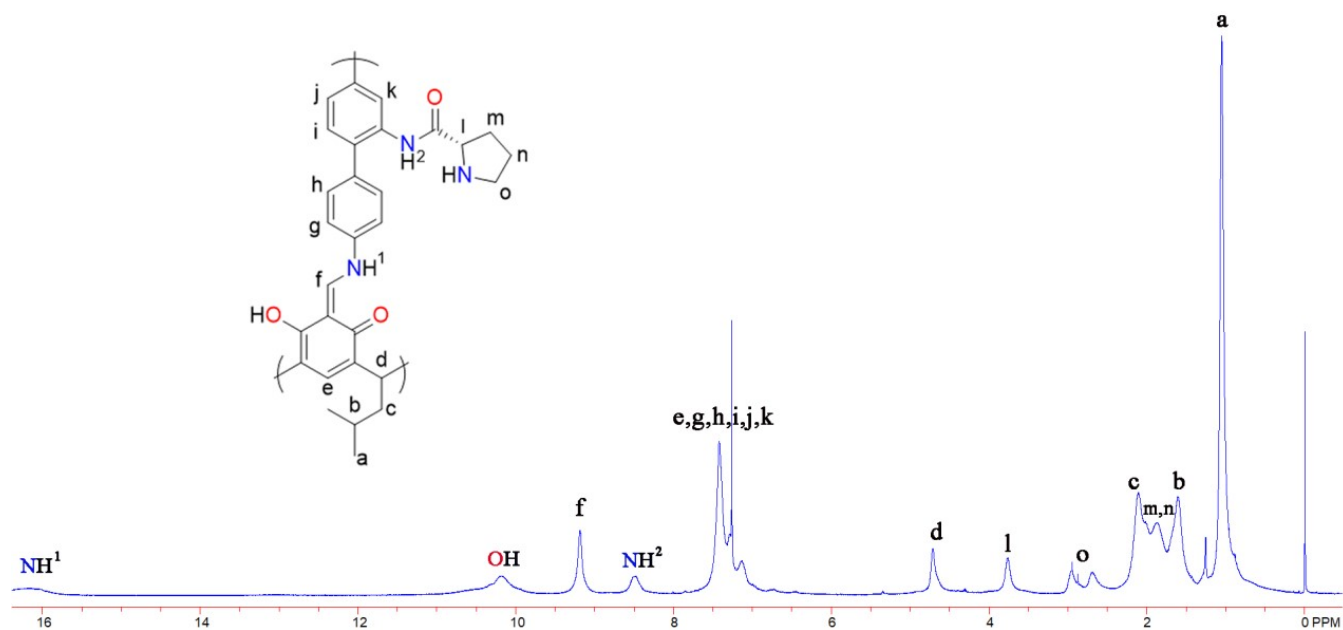

**Figure S6.**  $^1\text{H}$  NMR of CPOC-302-Pro ( $\text{CDCl}_3$ , 400 MHz).

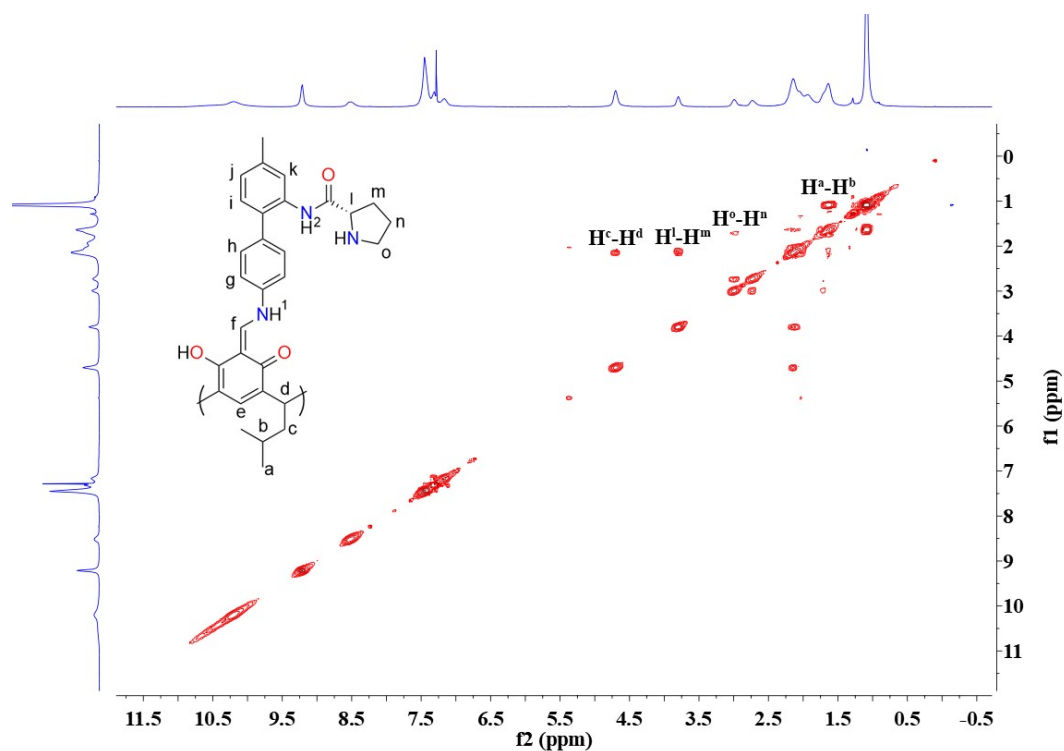

**Figure S7.**  $^1\text{H}$ - $^1\text{H}$  COSY NMR Spectrum of CPOC-302-Pro recorded in  $\text{CDCl}_3$ .

## SUPPORTING INFORMATION

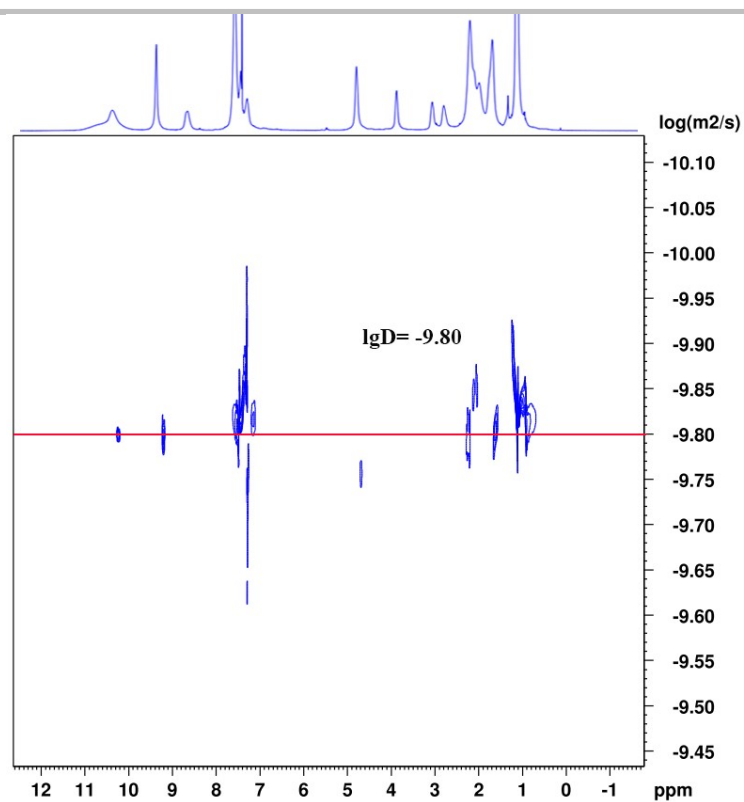

**Figure S8.**  $^1\text{H}$  DOSY NMR spectrum of CPOC-302-Pro recorded in  $\text{CDCl}_3$ .

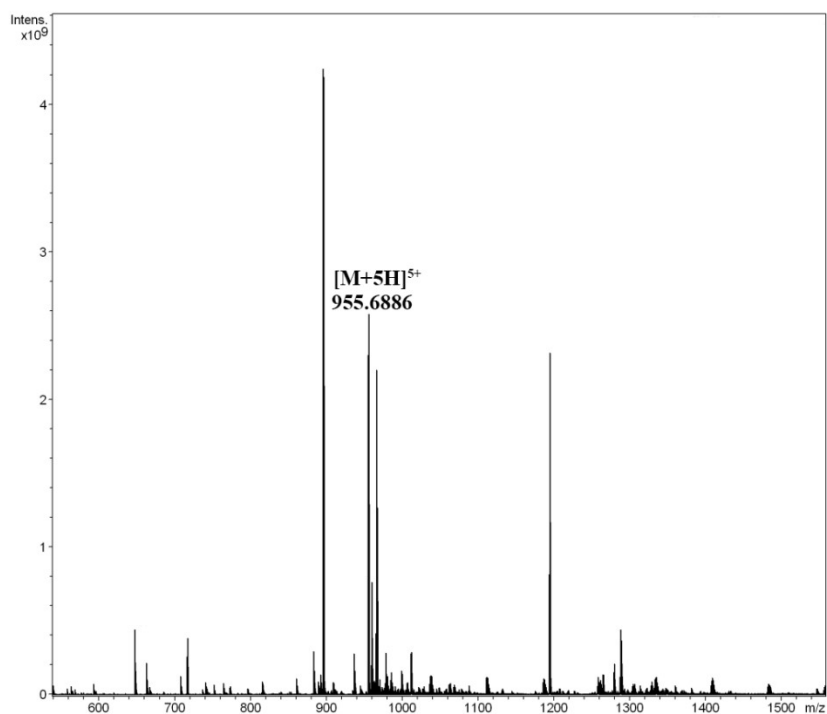

**Figure S9.** ESI-TOF-MS spectrum of CPOC-401-Pro.

## SUPPORTING INFORMATION

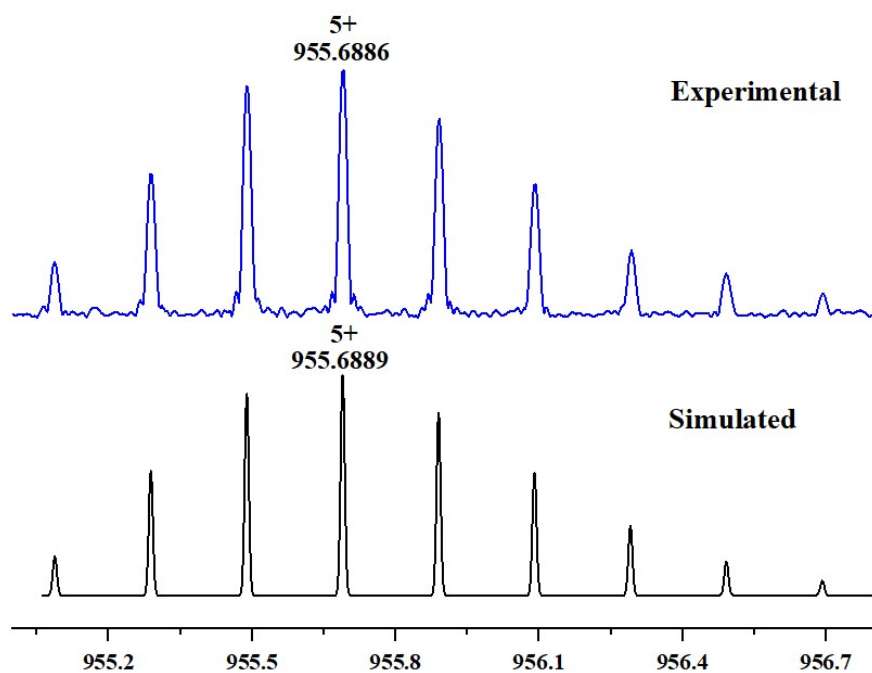

**Figure S10.** ESI-TOF-MS spectrum of  $[M+5H]^{5+}$ , M represents the intact assembly of CPOC-401-Pro.

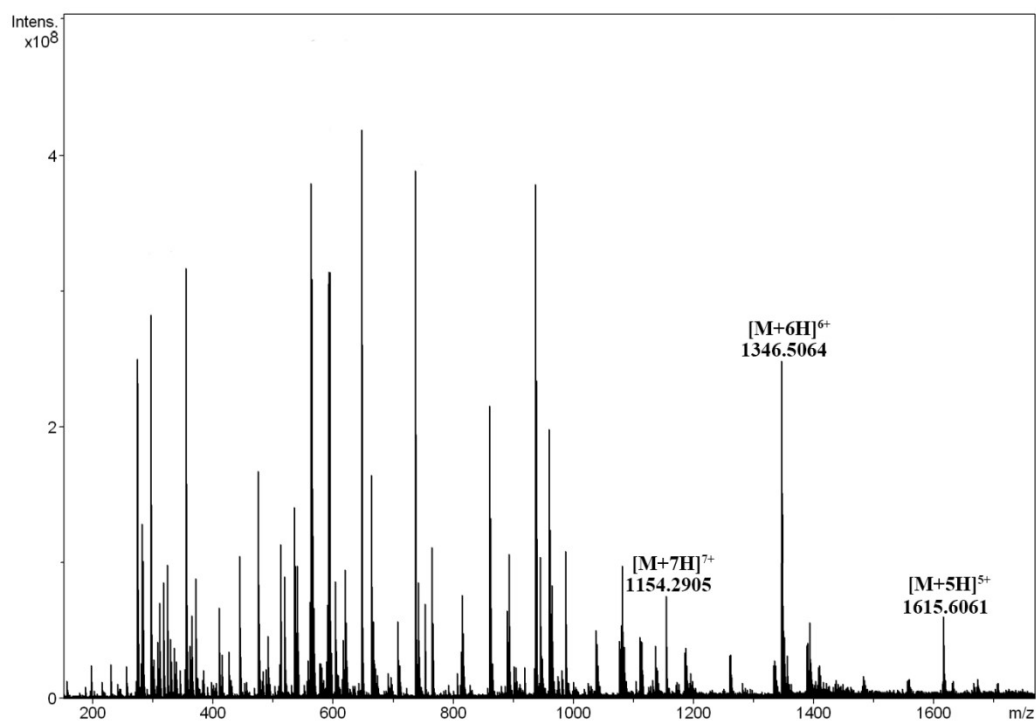

**Figure S11.** ESI-TOF-MS spectrum of CPOC-302-Pro.

## SUPPORTING INFORMATION

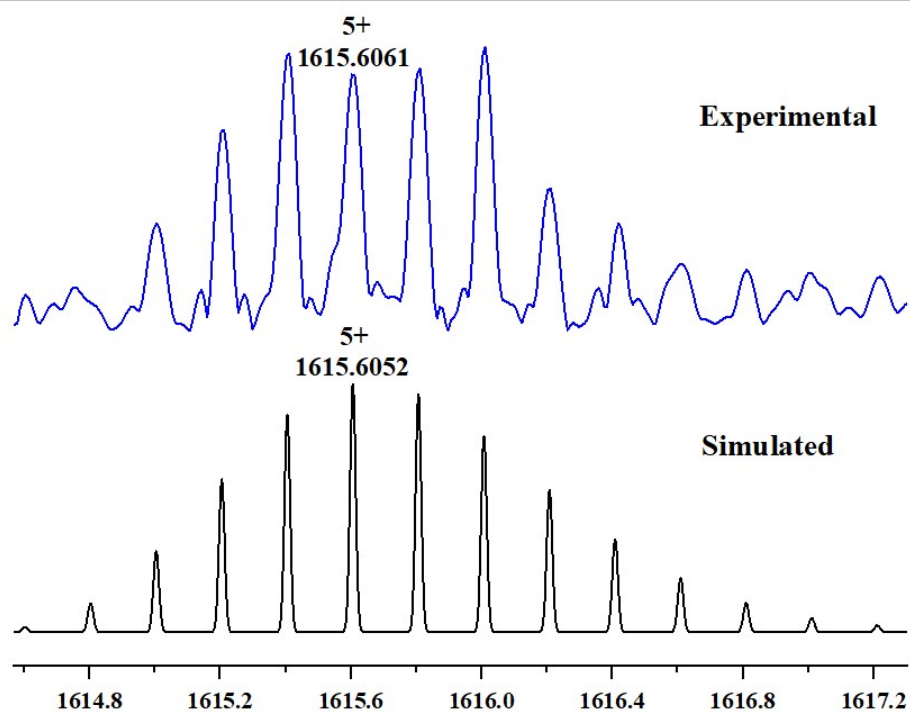

**Figure S12.** ESI-TOF-MS spectrum of  $[M+5H]^{5+}$ , M represents the intact assembly of CPOC-302-Pro.

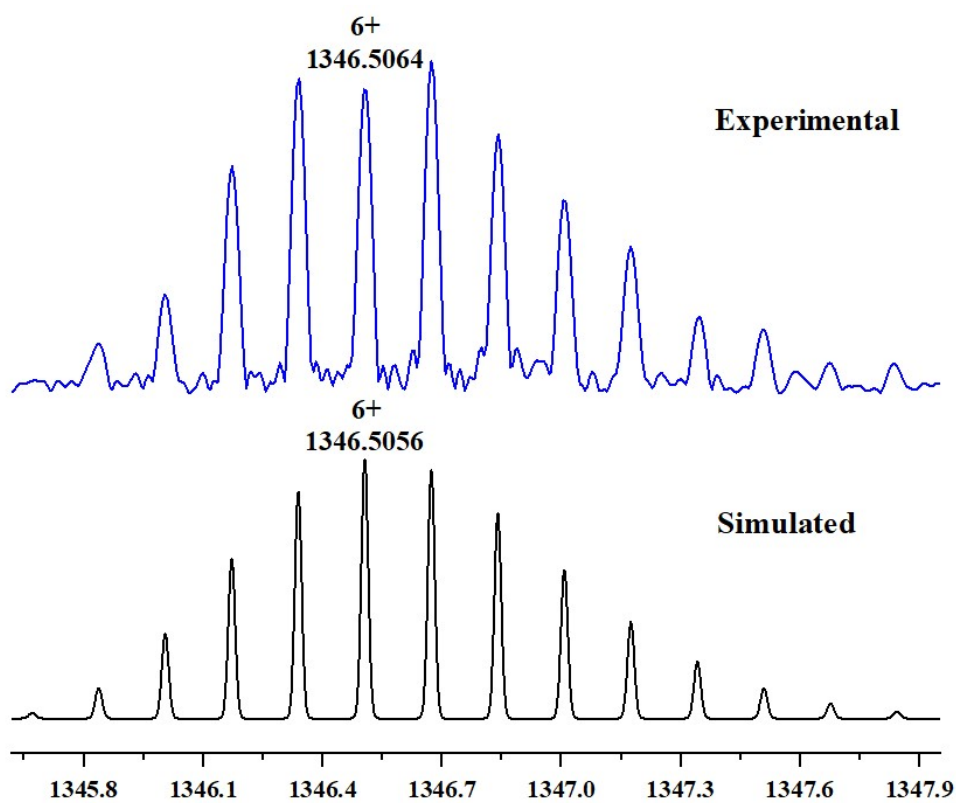

**Figure S13.** ESI-TOF-MS spectrum of  $[M+6H]^{6+}$ , M represents the intact assembly of CPOC-302-Pro.

## SUPPORTING INFORMATION

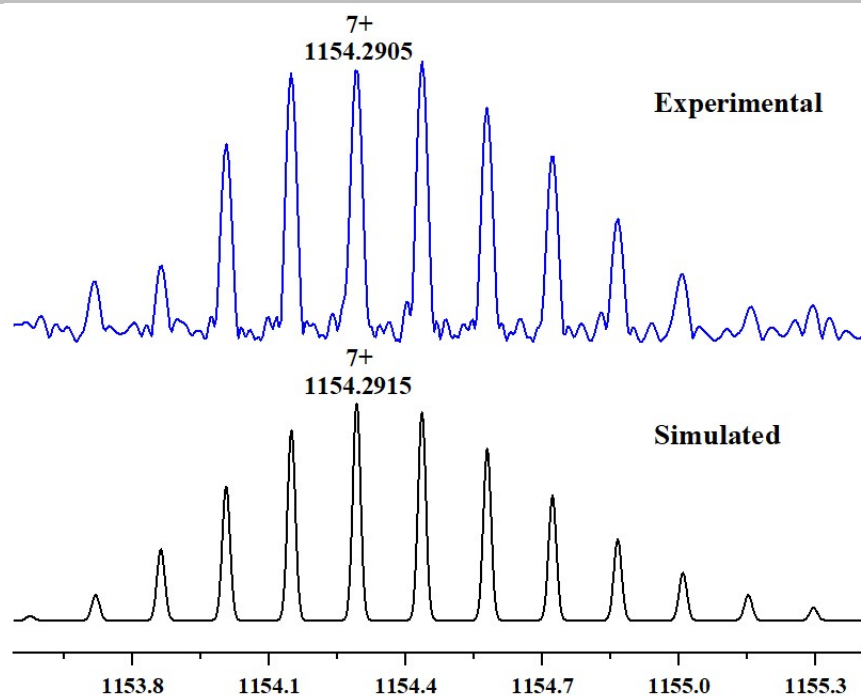

**Figure S14.** ESI-TOF-MS spectrum of  $[M+7H]^{7+}$ , M represents the intact assembly of CPOC-302-Pro.

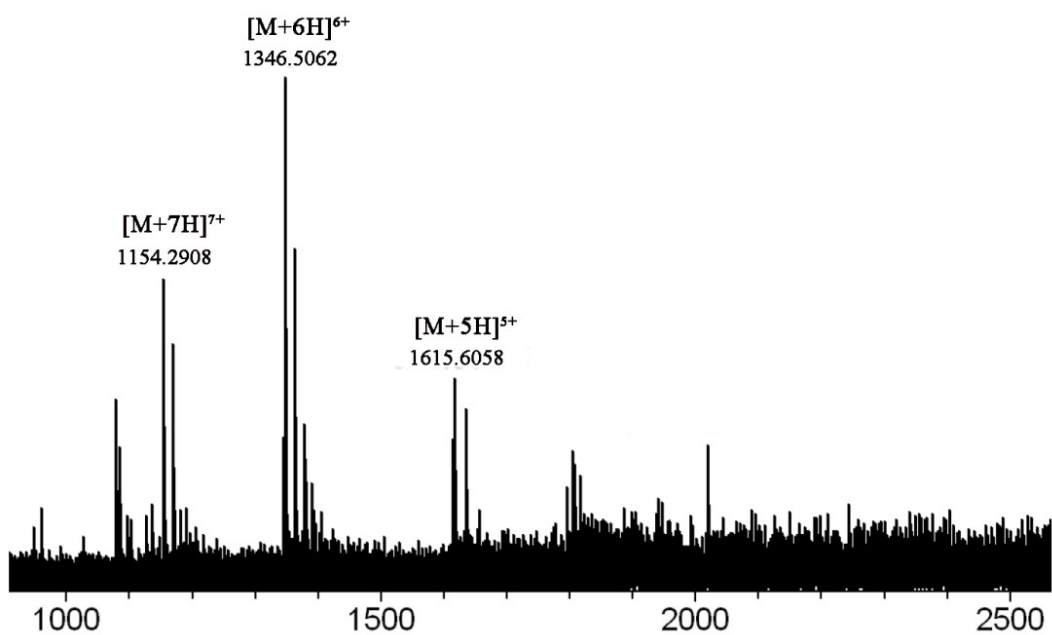

**Figure S15.** ESI-TOF-MS spectrum of CPOC-302-Pro after five catalytic cycles.

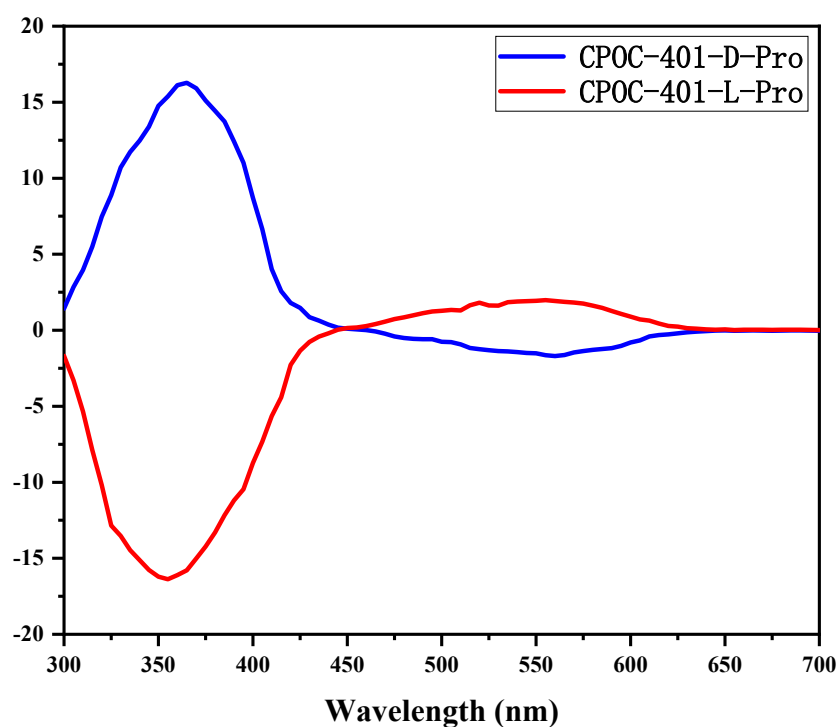

**Figure S16.** CD spectra of CPOC-401-Pro in  $\text{CHCl}_3$  at room temperature.

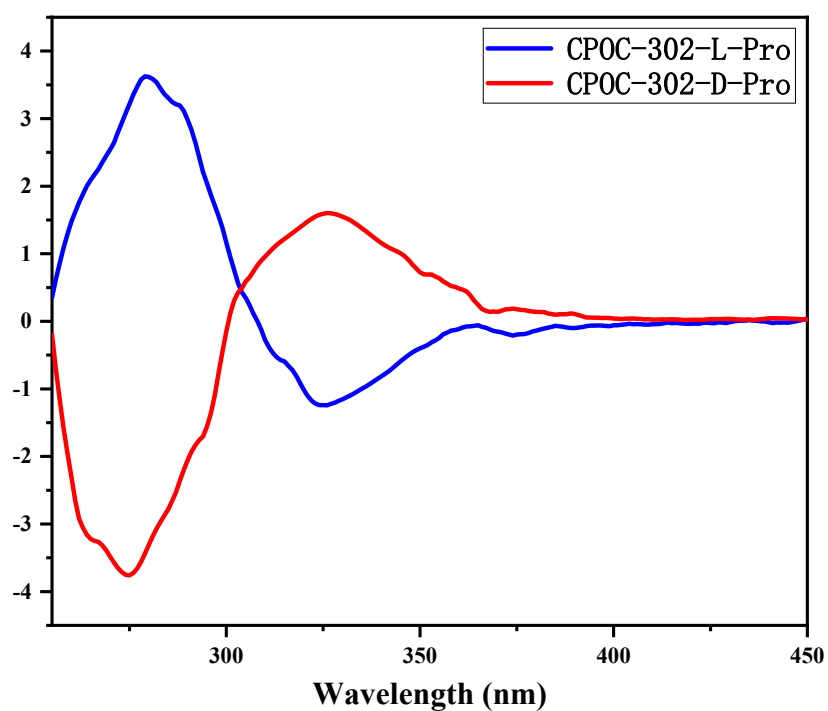

**Figure S17.** CD spectra of CPOC-302-Pro in  $\text{CHCl}_3$  at room temperature.



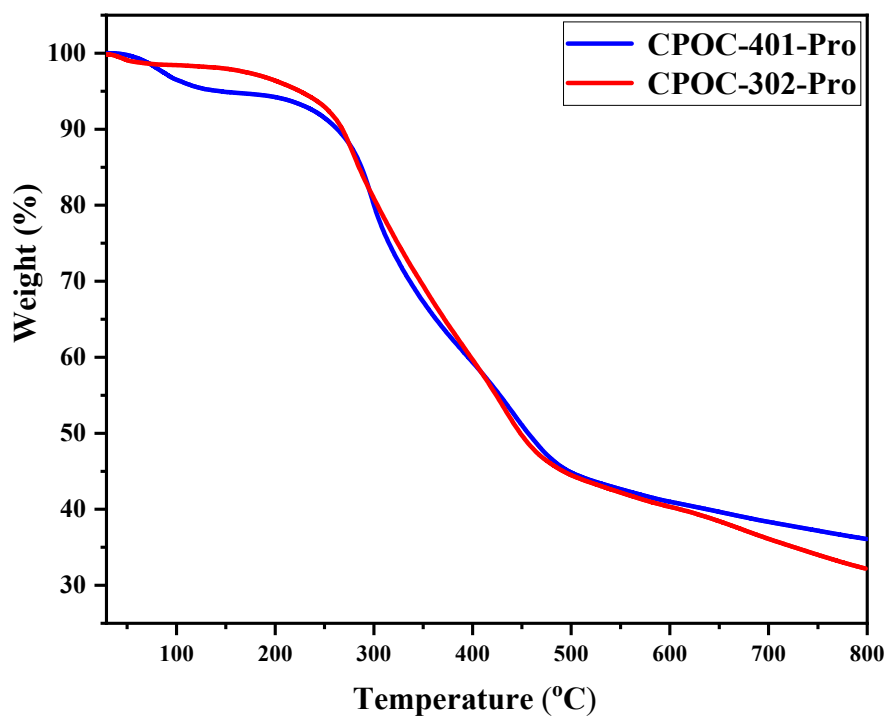

Figure S18. TGA curves of CPOC-401-Pro and CPOC-302-Pro.

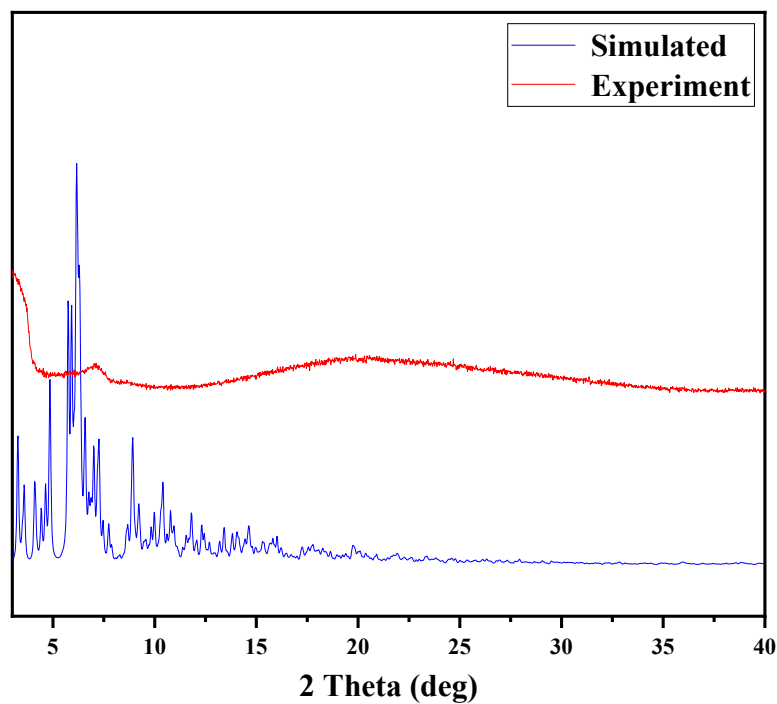

Figure S19. PXRD patterns of CPOC-401-Pro after desolvation.

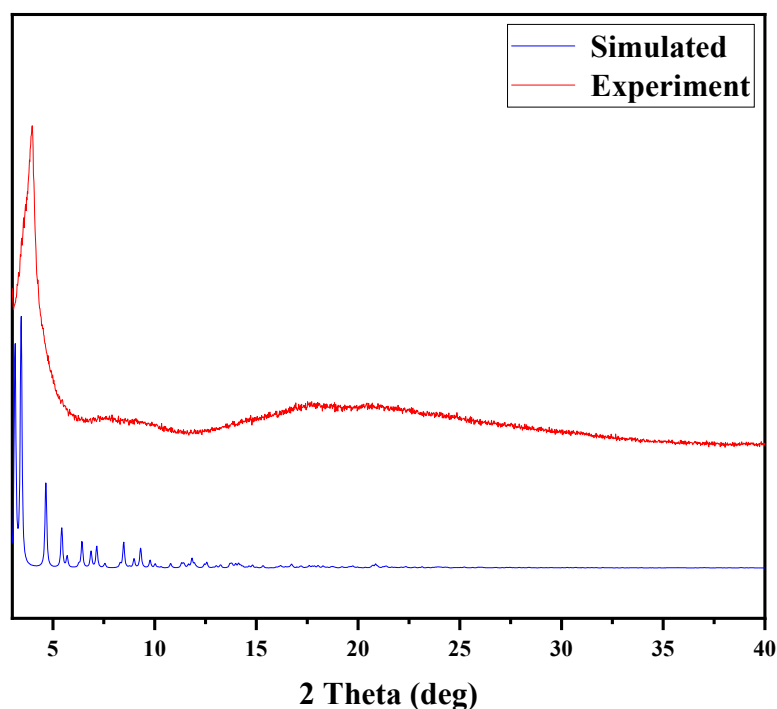

Figure S20. PXRD patterns of CPOC-302-Pro after desolvation.

### 2.3 Catalytic activity test of the synthesized chiral POCs

Table S1. Optimization of the reaction conditions of asymmetric aldol reaction

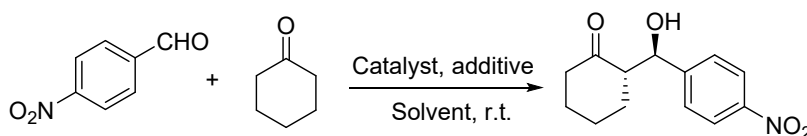

| Entry <sup>a</sup> | Catalyst     | Solvent            | Additive    | Yield(%) <sup>b</sup> | anti/syn <sup>c</sup> | ee(%) <sup>d</sup> |
|--------------------|--------------|--------------------|-------------|-----------------------|-----------------------|--------------------|
| 1                  | CPOC-302-Pro | Toluene            | Acetic acid | 65                    | 85:15                 | 79                 |
| 2                  | CPOC-302-Pro | Toluene            | TFA         | Trace                 | --                    | --                 |
| 3                  | CPOC-302-Pro | Toluene            | TsOH        | Trace                 | --                    | --                 |
| 4                  | CPOC-302-Pro | Toluene            | PhCOOH      | 76                    | 87:13                 | 81                 |
| 5                  | CPOC-302-Pro | Toluene            | 4-NBA       | 88                    | 88:12                 | 82                 |
| 6                  | CPOC-302-Pro | CHCl <sub>3</sub>  | 4-NBA       | 75                    | 89:11                 | 79                 |
| 7                  | CPOC-302-Pro | DCE                | 4-NBA       | 86                    | 83:17                 | 80                 |
| 8                  | CPOC-302-Pro | o-Xylene           | 4-NBA       | 90                    | 86:14                 | 83                 |
| 9                  | CPOC-302-Pro | Mesitylene         | 4-NBA       | 83                    | 85:15                 | 83                 |
| 10                 | CPOC-302-Pro | THF                | 4-NBA       | 64                    | 80:20                 | 82                 |
| 11                 | CPOC-302-Pro | CH <sub>3</sub> CN | 4-NBA       | 45                    | 75:25                 | 66                 |
| 12                 | CPOC-302-Pro | MTBE               | 4-NBA       | 95                    | 90:10                 | 86                 |

## SUPPORTING INFORMATION

|           |              |                             |       |    |       |    |
|-----------|--------------|-----------------------------|-------|----|-------|----|
| <b>13</b> | CPOC-302-Pro | MTBE/H <sub>2</sub> O=100/1 | 4-NBA | 99 | 93:7  | 92 |
| <b>14</b> | CPOC-401-Pro | MTBE/H <sub>2</sub> O=100/1 | 4-NBA | 98 | 88:12 | 83 |

<sup>a</sup>Reaction conditions: aldehyde (0.20 mmol), ketone (2.0 mmol), 10 mol% catalyst (related to the proline amount in the material), 4-nitrobenzoic acid (4-NBA) (20 mol%), H<sub>2</sub>O (0.01 mL), and MTBE (1.0 mL) at r.t. for 3 days. <sup>b</sup>Isolated yield. <sup>c</sup>Determined by <sup>1</sup>H NMR. <sup>d</sup>Determined by chiral HPLC.

### 2.3.1 General Procedure for asymmetric aldol reaction

In a tube with the aldehyde (0.2 mmol), ketone (2.0 mmol), 4-nitrobenzoic acid (0.04 mmol) and the chiral POCs (10 mol% loading of effective chiral proline groups) was added 1.0 mL MTBE and 0.01 mL H<sub>2</sub>O at room temperature. The mixture was stirred for 3 days at room temperature. After the reaction was completed (monitored by TLC), 3.0 mL *n*-hexane was added to the mixture and the catalyst was isolated by centrifugation and thoroughly washed with *n*-hexane for three times. The combined organic phase was concentrated in vacuo and purified by column chromatography on silica gel. <sup>1</sup>H NMR spectroscopy was used to determine the diastereoselectivity (dr) value. The enantioselectivity (ee) value was determined by HPLC on a chiral-phase Chiralpak AD-H, OD-H or AS-H column.

**Table S2.** Performance comparison between CPOC-302-Pro with other chiral porous/supramolecular materials for the model aldol reactions.

| Catalyst       | yield (%) | anti/syn | ee (%) | Reference |
|----------------|-----------|----------|--------|-----------|
| CPOC-302-Pro   | 99        | 93:7     | 92     | This work |
| CMIL-1         | 81        | 4:1      | 66     | S1        |
| Cd-TBT         | 97        | 1:1      | 58     | S2        |
| IRMOF-Pro      | 100       | 3:1      | 14     | S3        |
| Ap@3           | 72        | 3.3:1    | 74     | S4        |
| UiO-68-NHPro   | 97        | 12:88    | 0      | S5        |
| CZJ-18(Cu)-Pro | 95        | 5:1      | 88     | S6        |
| DMTA-TPB1/4'   | 95        | 9:1      | 92     | S7        |
| PAF-1-NHPro    | 70        | 10.3:1   | 71     | S8        |
| Co-Pro1        | 42        | 6:1      | 73     | S9        |

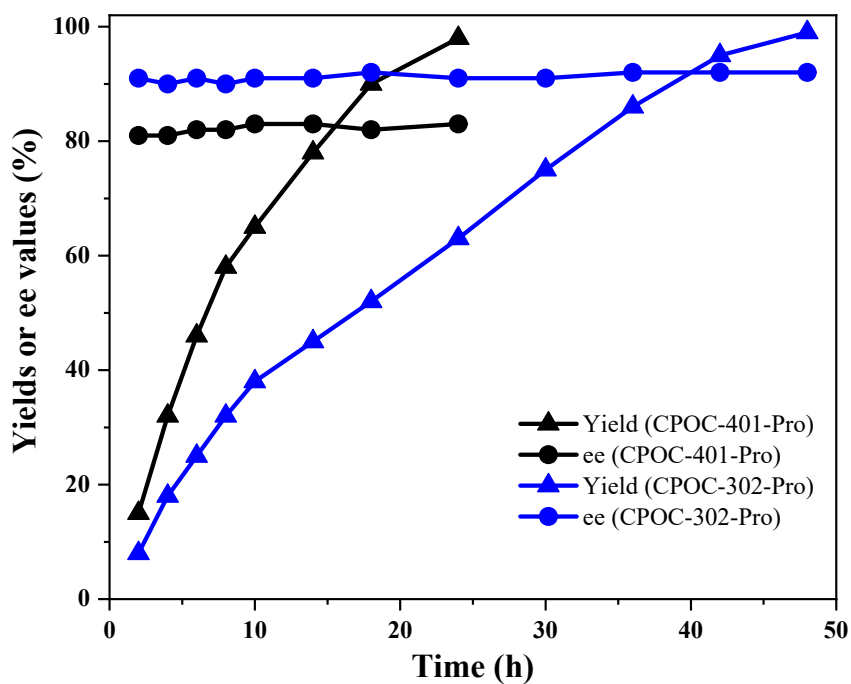

**Figure S21.** Kinetic results for the asymmetric aldol addition of p-nitrobenzaldehyde with cyclohexanone with 10 mol% loadings of chiral proline groups in the cage catalysts.

**Table S3.** Substrate Scope of the aldol addition reactions catalyzed by CPOC-401-Pro<sup>a</sup>

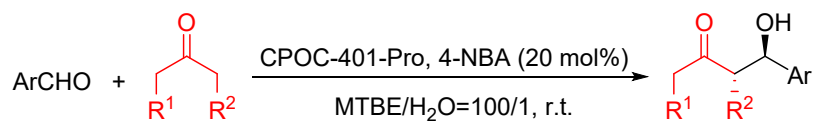

## SUPPORTING INFORMATION

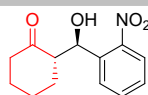

yield = 90%  
dr = 87:13  
ee = 84%

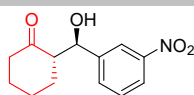

yield = 93%  
dr = 85:15  
ee = 82%

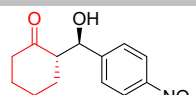

yield = 95%  
dr = 90:10  
ee = 83%

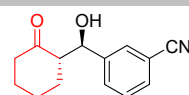

yield = 92%  
dr = 83:17  
ee = 76%

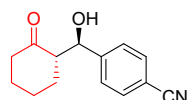

yield = 94%  
dr = 92:8  
ee = 77%

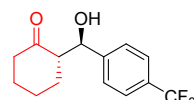

yield = 91%  
dr = 89:11  
ee = 75%

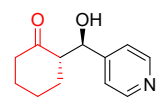

yield = 96%  
dr = 78:22  
ee = 76%

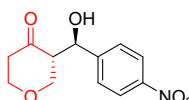

yield = 95%  
dr = 75:25  
ee = 70%

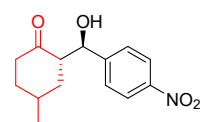

yield = 90%  
dr = 86:14  
ee = 72%

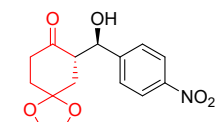

yield = 97%  
dr = 82:18  
ee = 76%

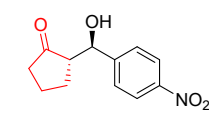

yield = 98%  
dr = 79:21  
ee = 84%<sup>b</sup>

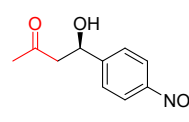

yield = 90%  
ee = 44%<sup>b</sup>

<sup>a</sup>Reaction conditions: aldehyde (0.20 mmol), ketone (2.0 mmol), 10 mol% catalyst (related to the proline amount in the material), 4-NBA (20 mol%), H<sub>2</sub>O (0.01 mL), and MTBE (1.0 mL) at r.t. for 3 days. Isolated yield. The above Catalytic products were characterized by <sup>1</sup>H NMR and their ee values were determined by chiral HPLC. <sup>b</sup>Under the 0 °C reaction conditions.

### 2.3.2 <sup>1</sup>H NMR and HPLC of the catalytic product

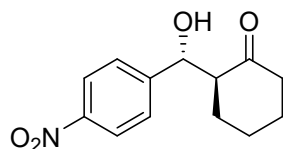

#### (S)-2-((R)-hydroxy(2-nitrophenyl)methyl)cyclohexan-1-one

<sup>1</sup>H NMR (400 MHz, CDCl<sub>3</sub>): δ (ppm) = 8.20 (d, 2H), 7.52 (d, 2H), 4.91 (dd, 1H), 4.13 (d, 1H), 2.58-2.64 (m, 1H), 2.47-2.52 (m, 1H), 2.34-2.42 (m, 1H), 2.09-2.15 (m, 1H), 1.81-1.85 (m, 1H), 1.54-1.70 (m, 3H), 1.33-1.44 (m, 1H). HPLC analysis (Chiralcel AD-H column, n-Hexane/*i*-PrOH = 90:10, 1.0 mL/min, λ = 254 nm), t<sub>minor</sub> = 28.2 min, t<sub>major</sub> = 37.7 min.

# SUPPORTING INFORMATION

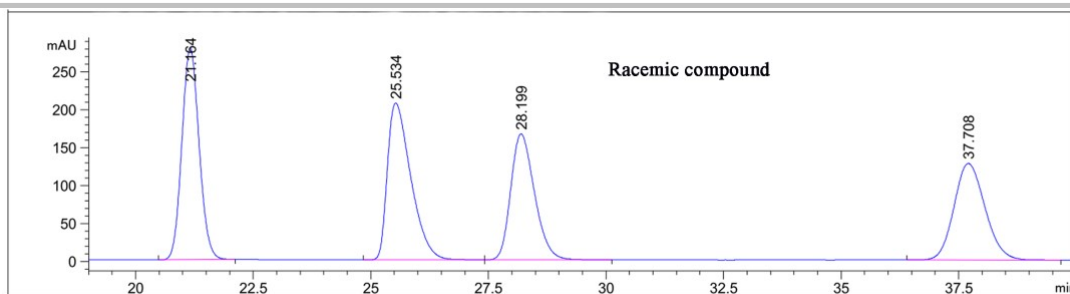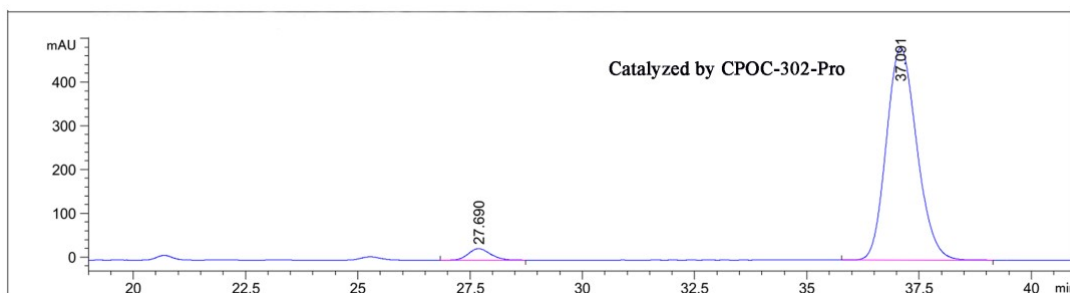

| Serial Number | Retention Time [min] | Area    | Area % |
|---------------|----------------------|---------|--------|
| 1             | 27.690               | 89561   | 3.77   |
| 2             | 37.091               | 2286381 | 96.23  |

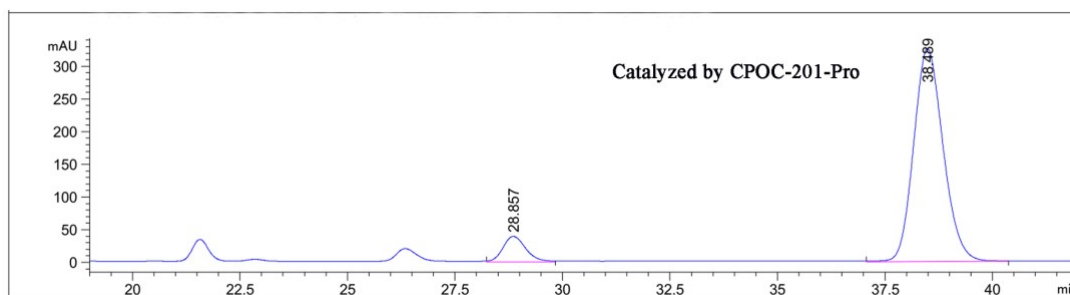

| Serial Number | Retention Time [min] | Area    | Area % |
|---------------|----------------------|---------|--------|
| 1             | 28.857               | 146798  | 8.63   |
| 2             | 38.489               | 1554331 | 91.37  |

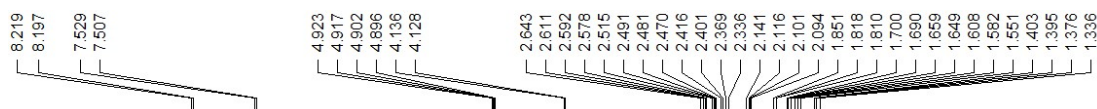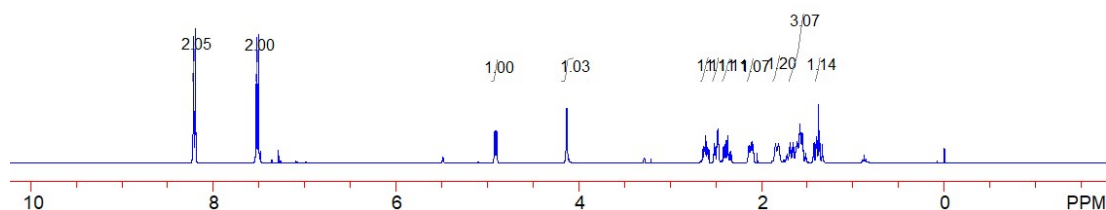

## SUPPORTING INFORMATION

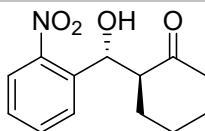

### (S)-2-((R)-hydroxy(4-nitrophenyl)methyl)cyclohexan-1-one

$^1\text{H}$  NMR (400 MHz,  $\text{CDCl}_3$ ):  $\delta$  (ppm) = 7.85 (d, 1H), 7.77 (d, 1H), 7.64 (t, 1H), 7.44 (t, 1H), 5.45 (d, 1H), 4.09 (bs, 1H), 2.74-2.80 (m, 1H), 2.43-2.48 (m, 1H), 2.30-2.39 (m, 1H), 2.05-2.13 (m, 1H), 1.83-1.87 (m, 1H), 1.57-1.78 (m, 4H). HPLC analysis (Chiralcel AD-H column, n-Hexane/*i*-PrOH = 80:20, 0.5 mL/min,  $\lambda$  = 254 nm),  $t_{\text{major}}$  = 22.7 min,  $t_{\text{minor}}$  = 24.4 min.

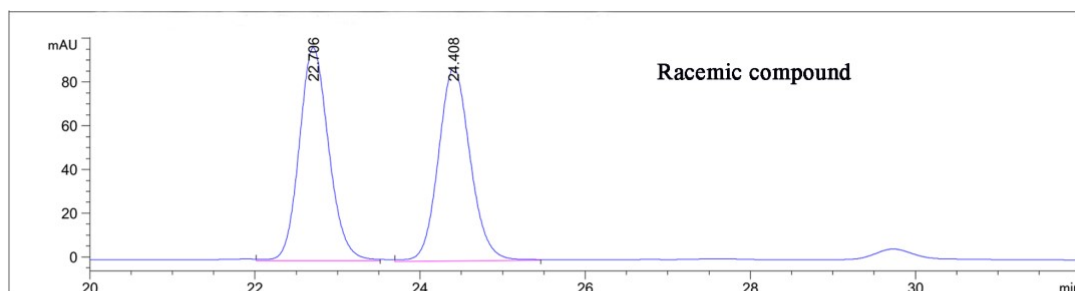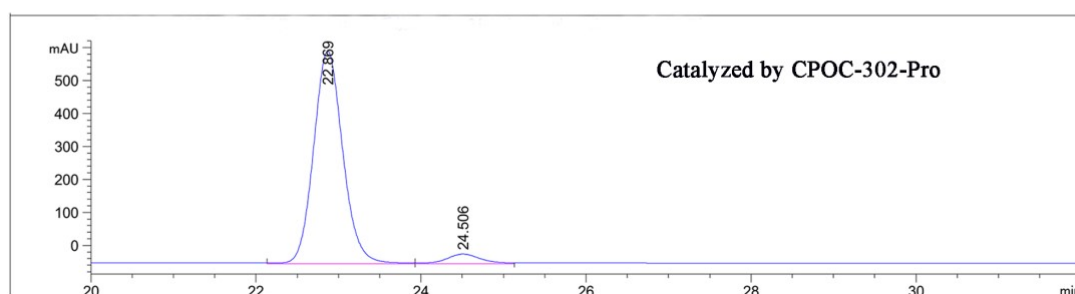

| Serial Number | Retention Time [min] | Area    | Area % |
|---------------|----------------------|---------|--------|
| 1             | 22.869               | 1597001 | 94.82  |
| 2             | 24.506               | 87240   | 5.18   |

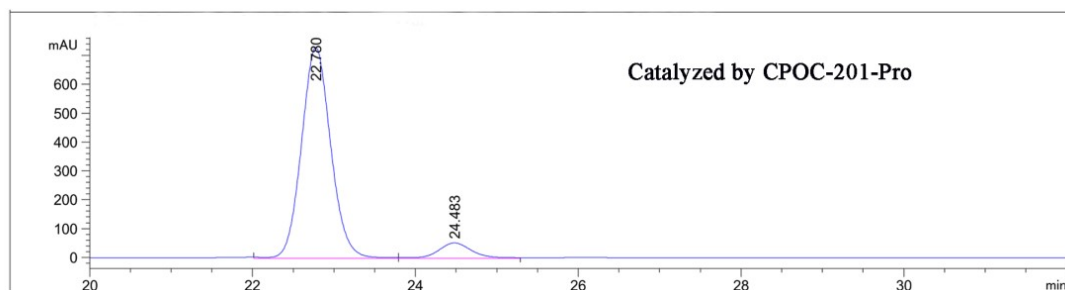

| Serial Number | Retention Time [min] | Area    | Area % |
|---------------|----------------------|---------|--------|
| 1             | 22.780               | 1831771 | 92.10  |
| 2             | 24.483               | 157221  | 7.90   |

# SUPPORTING INFORMATION

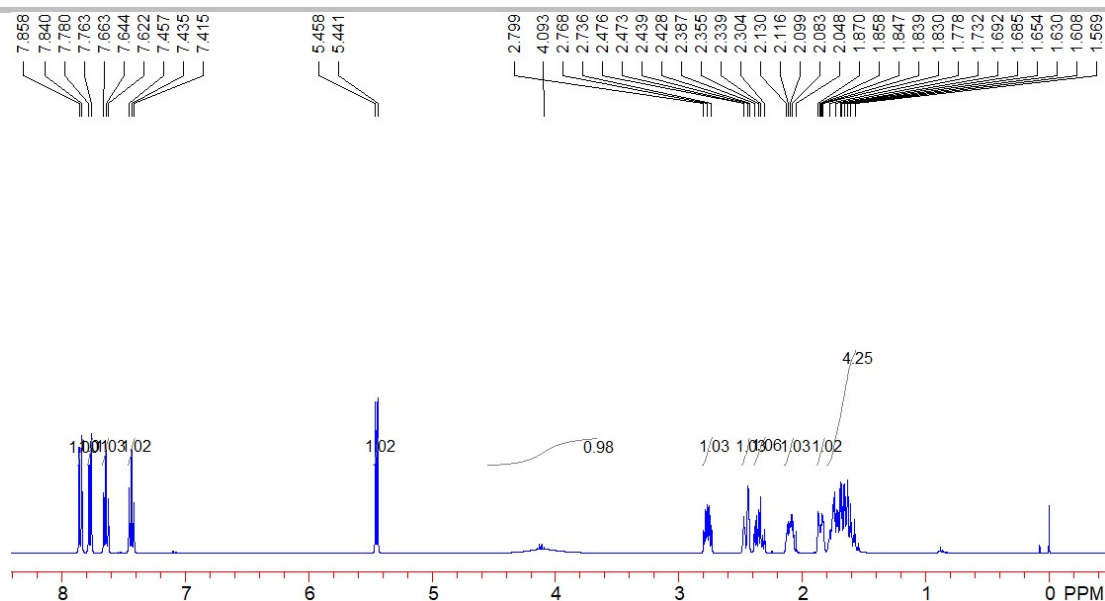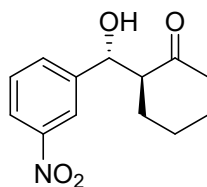

## (S)-2-((R)-hydroxy(3-nitrophenyl)methyl)cyclohexan-1-one

$^1\text{H}$  NMR (400 MHz,  $\text{CDCl}_3$ ):  $\delta$  (ppm)= 8.22 (s, 1H), 8.15-8.18 (m, 1H), 7.68 (d, 1H), 7.54 (t, 1H), 4.91 (dd, 1H), 4.17 (d, 1H), 2.62-2.67 (m, 1H), 2.48-2.53 (m, 1H), 2.38-2.42 (m, 1H), 2.10-2.15 (m, 1H), 1.81-1.85 (m, 1H), 1.55-1.71 (m, 3H), 1.38-1.42 (m, 1H). HPLC analysis (Chiralcel AD-H column, n-Hexane/i-PrOH = 90:10, 1.0 mL/min,  $\lambda$  = 254 nm),  $t_{\text{major}}$  = 22.3 min,  $t_{\text{minor}}$  = 28.6 min.

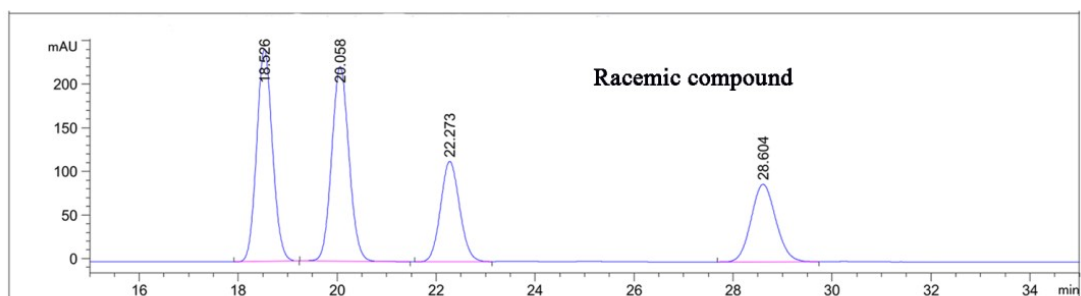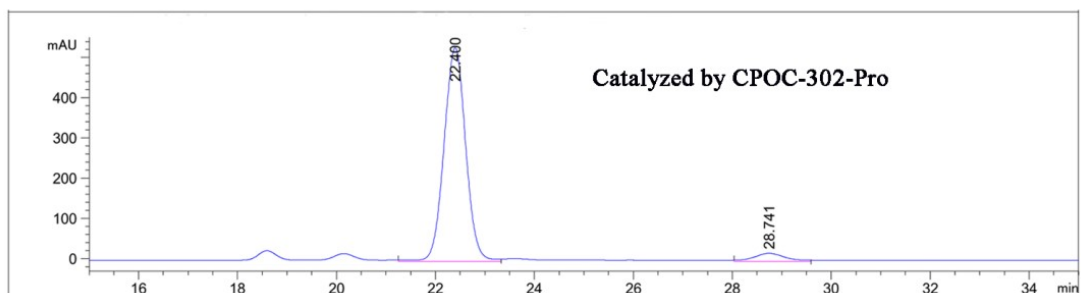



## SUPPORTING INFORMATION

| Serial Number | Retention Time [min] | Area    | Area % |
|---------------|----------------------|---------|--------|
| 1             | 22.400               | 1620880 | 94.58  |
| 2             | 28.741               | 92884   | 5.42   |

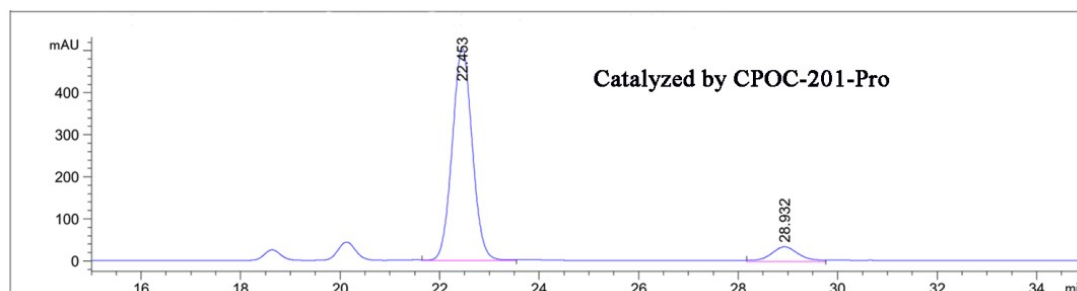

| Serial Number | Retention Time [min] | Area    | Area % |
|---------------|----------------------|---------|--------|
| 1             | 22.453               | 1422240 | 91.08  |
| 2             | 28.932               | 139239  | 8.92   |

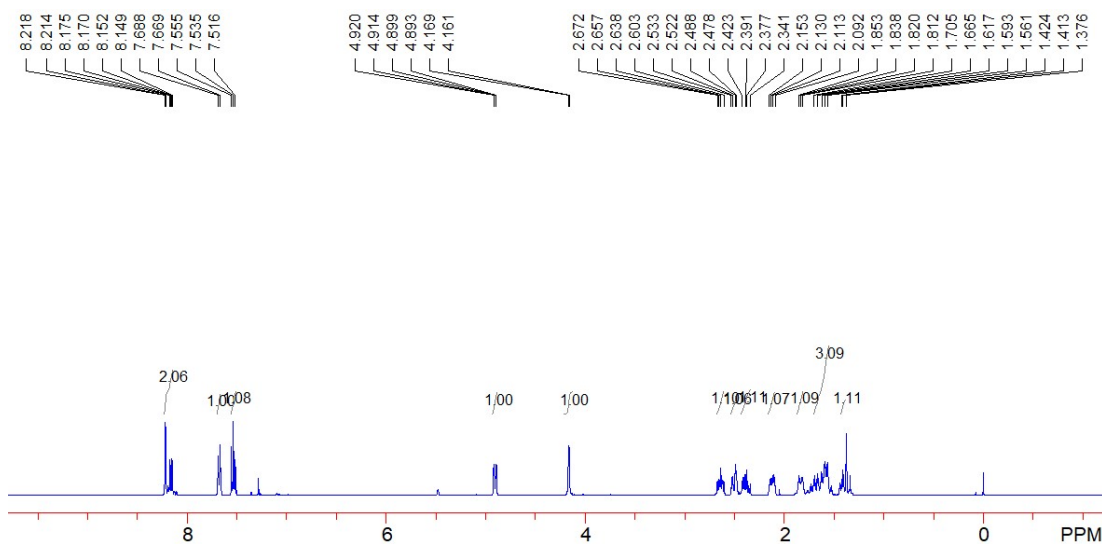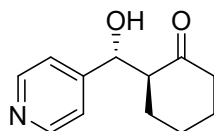

### (S)-2-((R)-hydroxy(pyridin-4-yl)methyl)cyclohexan-1-one

<sup>1</sup>H NMR (400 MHz, CDCl<sub>3</sub>): δ (ppm)= 8.54-8.56 (m, 2H), 7.26-7.27 (m, 2H), 4.82 (d, 1H), 4.40 (s, 1H), 2.58-2.64 (m, 1H), 2.45-2.50 (m, 1H), 2.32-2.40 (m, 1H), 2.08-2.12 (m, 1H), 1.82-1.85 (m, 1H), 1.55-1.69 (m, 1H), 1.36-1.43 (m, 1H). HPLC analysis (Chiralcel OD-H column, n-Hexane/i-PrOH = 90:10, 1.0 mL/min, λ = 254 nm), t<sub>major</sub> = 19.2 min, t<sub>minor</sub> = 21.3 min.

# SUPPORTING INFORMATION

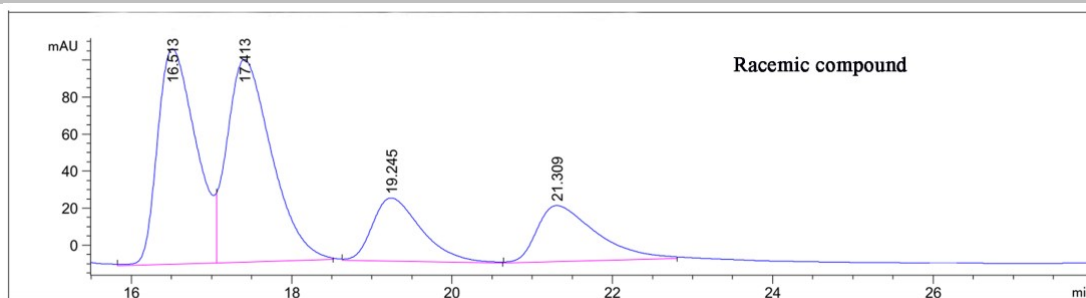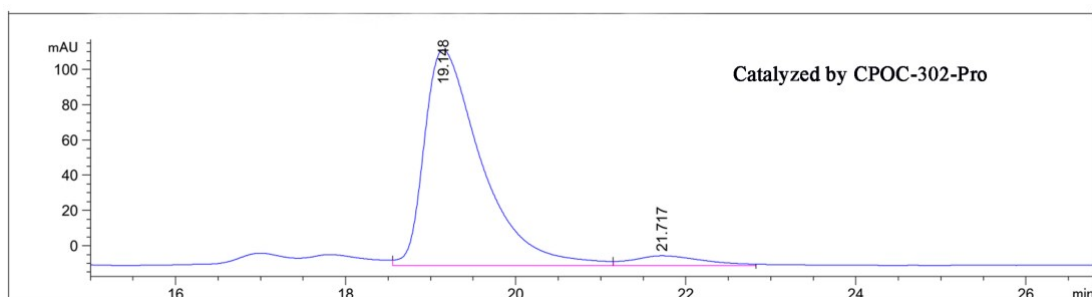

| Serial Number | Retention Time [min] | Area    | Area % |
|---------------|----------------------|---------|--------|
| 1             | 19.148               | 5724669 | 94.68  |
| 2             | 21.717               | 321526  | 5.32   |

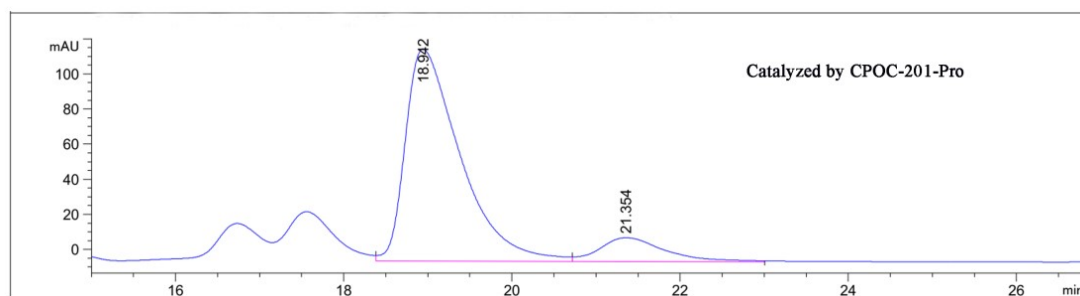

| Serial Number | Retention Time [min] | Area    | Area % |
|---------------|----------------------|---------|--------|
| 1             | 18.942               | 5472777 | 88.16  |
| 2             | 21.354               | 735248  | 11.84  |

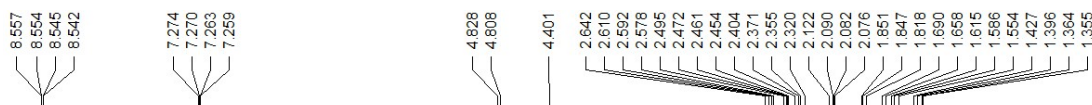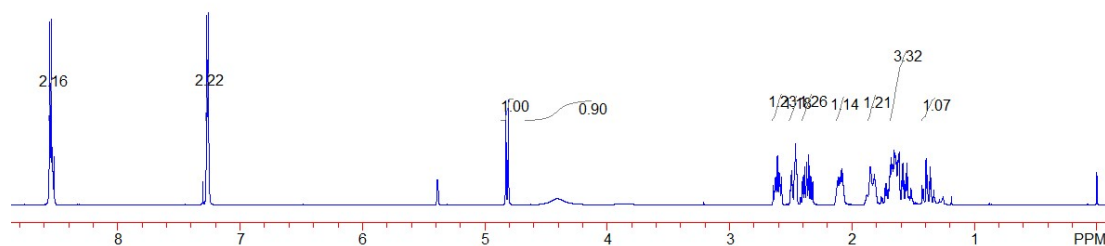

## SUPPORTING INFORMATION

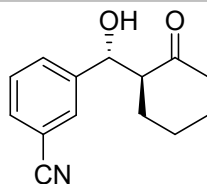

### 3-((R)-hydroxy((S)-2-oxocyclohexyl)methyl)benzonitrile

$^1\text{H}$  NMR (400 MHz,  $\text{CDCl}_3$ ):  $\delta$  (ppm) = 7.65 (s, 1H), 7.56-7.61 (m, 2H), 7.45-7.48 (m, 1H), 4.82 (d, 1H), 4.12 (s, 1H), 2.55-2.62 (m, 1H), 2.47-2.52 (m, 1H), 2.33-2.41 (m, 1H), 2.09-2.14 (m, 1H), 1.81-1.85 (m, 1H), 1.53-1.70 (m, 3H), 1.26-1.37 (m, 1H). HPLC analysis (Chiralcel AD-H column, n-Hexane/*i*-PrOH = 90:10, 1.0 mL/min,  $\lambda$  = 220 nm),  $t_{\text{major}}$  = 23.6 min,  $t_{\text{minor}}$  = 30.6 min.

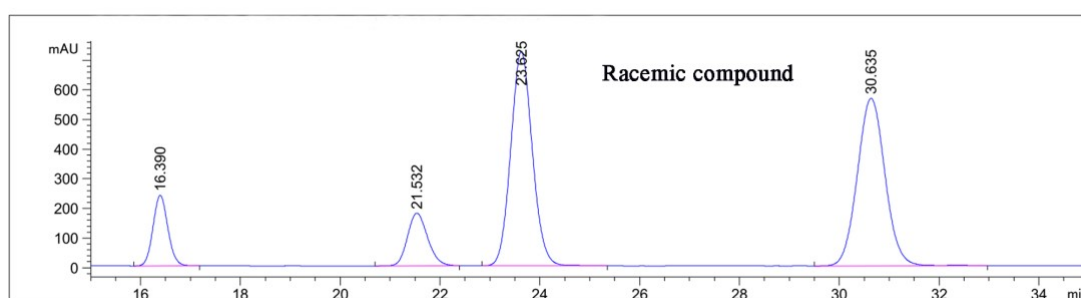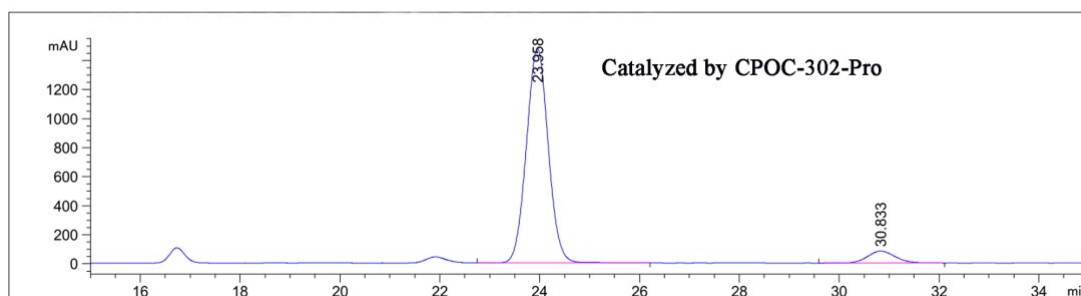

| Serial Number | Retention Time [min] | Area    | Area % |
|---------------|----------------------|---------|--------|
| 1             | 23.958               | 4498071 | 93.38  |
| 2             | 30.833               | 318736  | 6.62   |

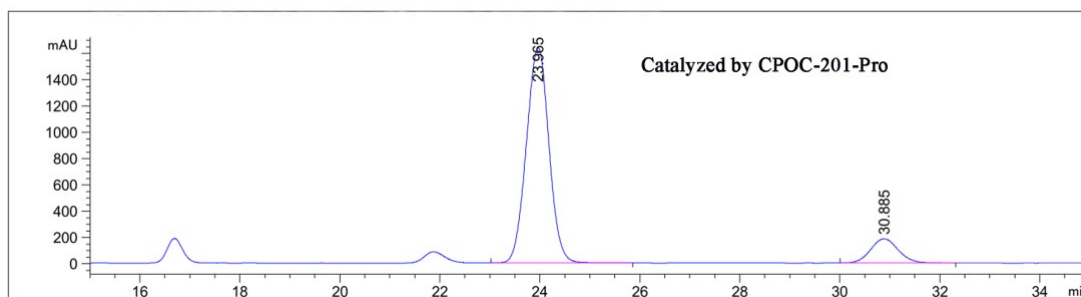

| Serial Number | Retention Time [min] | Area    | Area % |
|---------------|----------------------|---------|--------|
| 1             | 23.965               | 5152551 | 87.94  |
| 2             | 30.885               | 706541  | 12.06  |

# SUPPORTING INFORMATION

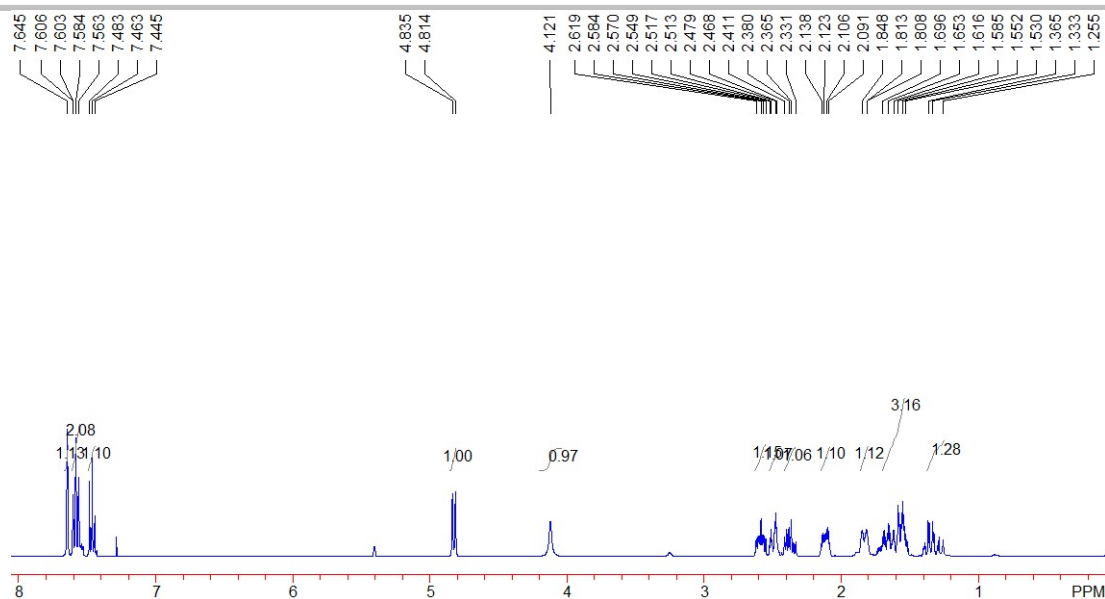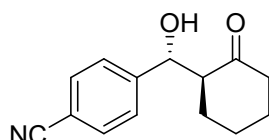

## 4-((R)-hydroxy((S)-2-oxocyclohexyl)methyl)benzonitrile

$^1\text{H}$  NMR (400 MHz,  $\text{CDCl}_3$ ):  $\delta$  (ppm)= 7.65 (d, 2H), 7.45 (d, 2H), 4.84 (dd, 1H), 4.09 (d, 1H), 2.46-2.61 (m, 2H), 2.32-2.40 (m, 1H), 2.09-2.13 (m, 1H), 1.81-1.84 (m, 1H), 1.53-1.69 (m, 3H), 1.33-1.37 (m, 1H). HPLC analysis (Chiralcel AD-H column, n-Hexane/*i*-PrOH = 90:10, 1.0 mL/min,  $\lambda$  = 220 nm),  $t_{\text{minor}}$  = 27.2 min,  $t_{\text{major}}$  = 34.9 min.

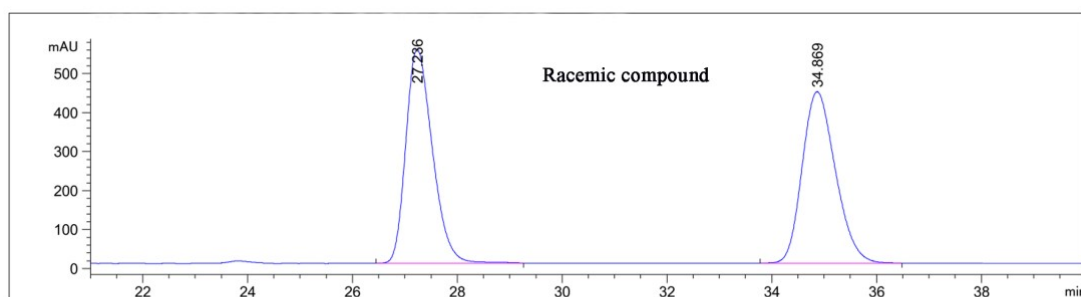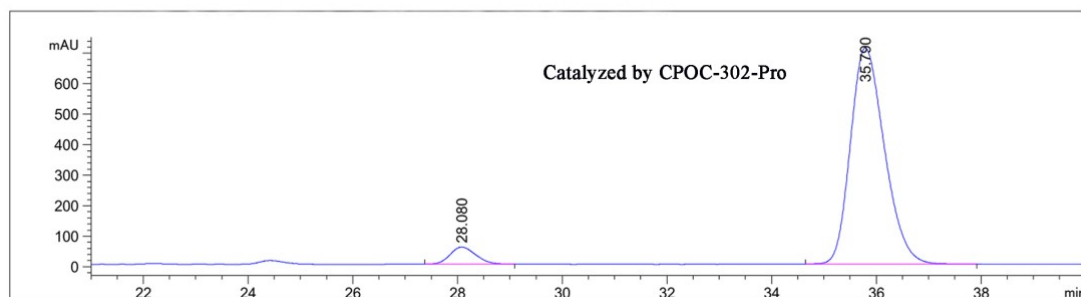

| Serial Number | Retention Time [min] | Area    | Area % |
|---------------|----------------------|---------|--------|
| 1             | 28.080               | 191464  | 5.64   |
| 2             | 35.790               | 3200451 | 94.36  |

# SUPPORTING INFORMATION

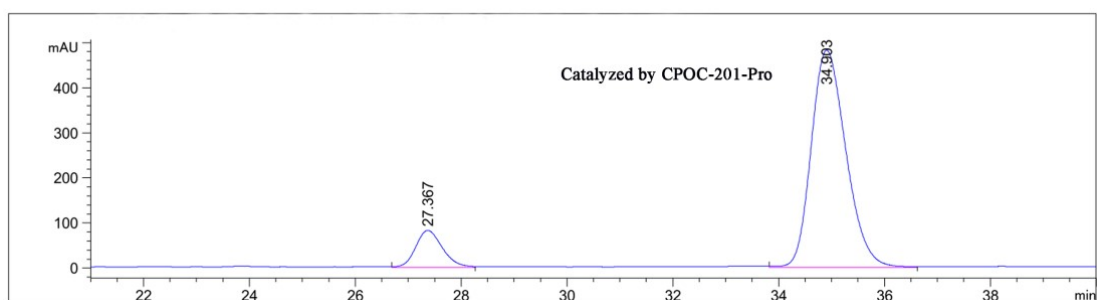

| Serial Number | Retention Time [min] | Area    | Area % |
|---------------|----------------------|---------|--------|
| 1             | 27.367               | 293189  | 11.75  |
| 2             | 34.903               | 2202461 | 88.25  |

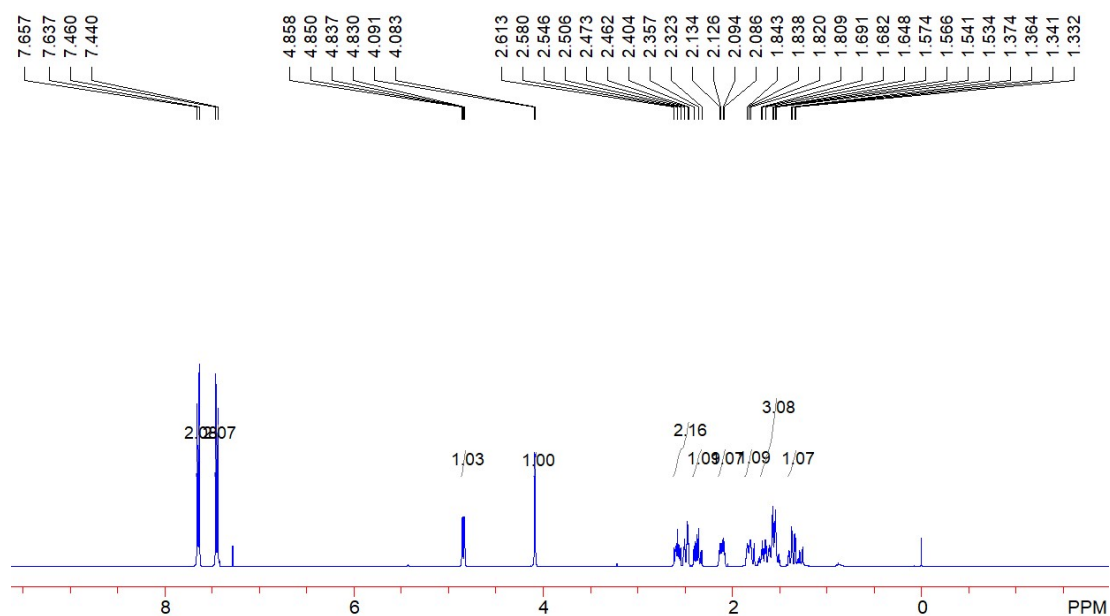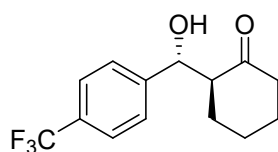

## (S)-2-((R)-hydroxy(4-(trifluoromethyl)phenyl)methyl)cyclohexan-1-one

$^1\text{H}$  NMR (400 MHz,  $\text{CDCl}_3$ ):  $\delta$  (ppm) = 7.61 (d, 2H), 7.45 (d, 2H), 4.85 (d, 1H), 4.06 (s, 1H), 2.56-2.63 (m, 1H), 2.47-2.52 (m, 1H), 2.32-2.41 (m, 1H), 2.07-2.14 (m, 1H), 1.79-1.84 (m, 1H), 1.64-1.69 (m, 1H), 1.53-1.61 (m, 2H), 1.32-1.38 (m, 1H). HPLC analysis (Chiralcel AD-H column, n-Hexane/*i*-PrOH = 90:10, 1.0 mL/min,  $\lambda$  = 220 nm),  $t_{\text{minor}}$  = 11.2 min,  $t_{\text{major}}$  = 14.2 min.

# SUPPORTING INFORMATION

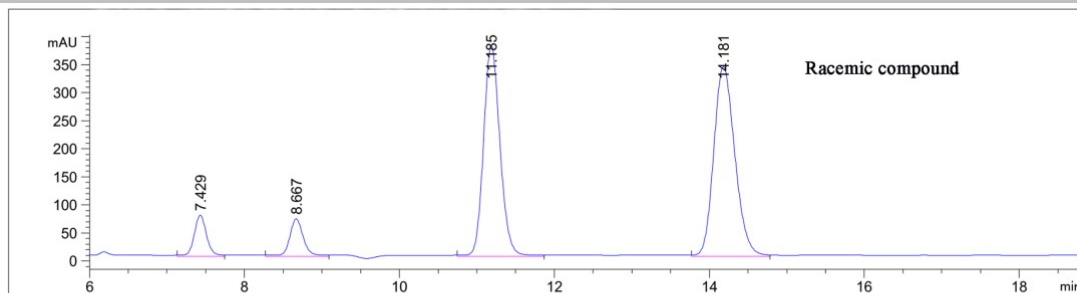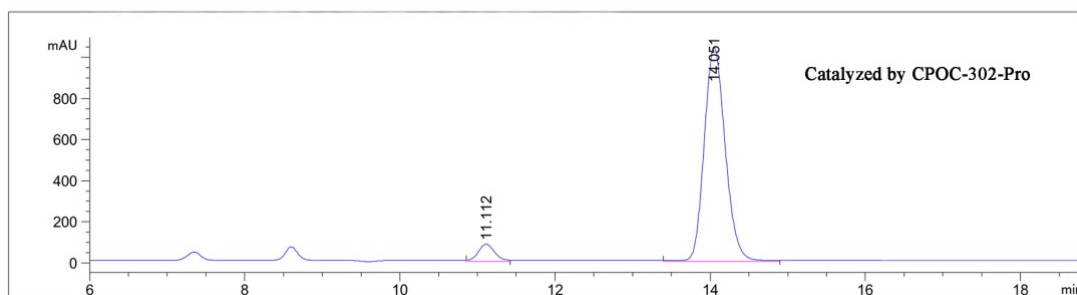

| Serial Number | Retention Time [min] | Area    | Area % |
|---------------|----------------------|---------|--------|
| 1             | 11.112               | 124667  | 5.95   |
| 2             | 14.051               | 1969261 | 94.05  |

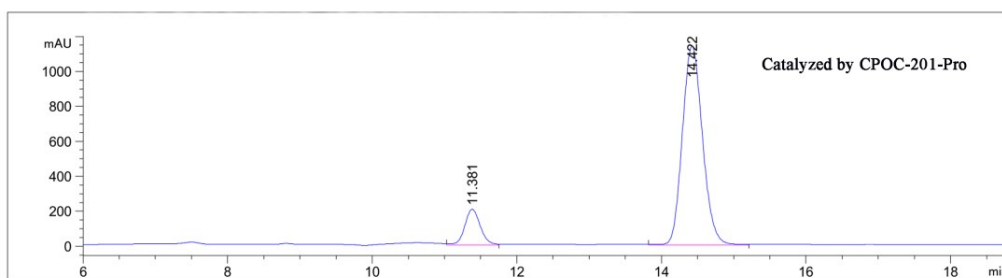

| Serial Number | Retention Time [min] | Area    | Area % |
|---------------|----------------------|---------|--------|
| 1             | 11.381               | 309841  | 12.26  |
| 2             | 14.422               | 2216971 | 87.74  |

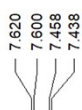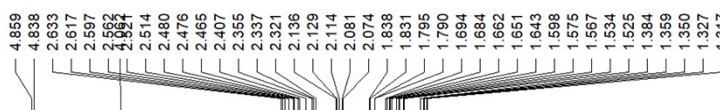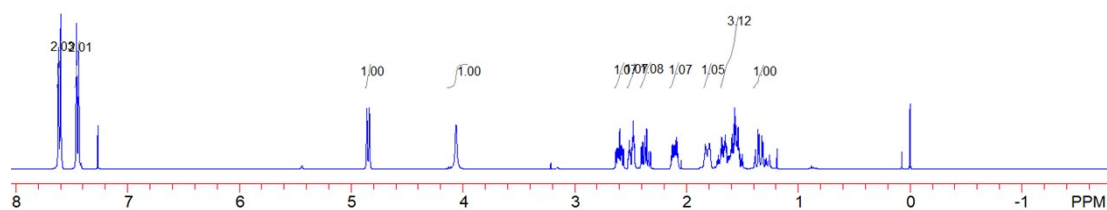

## SUPPORTING INFORMATION

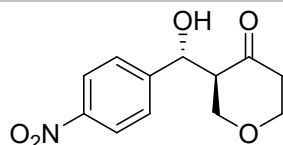

### (S)-3-((R)-hydroxy(4-nitrophenyl)methyl)tetrahydro-4H-pyran-4-one

$^1\text{H}$  NMR (400 MHz,  $\text{CDCl}_3$ ):  $\delta$  (ppm) = 8.23 (d, 2H), 7.53 (d, 2H), 5.00 (dd, 1H), 4.18-4.24 (m, 1H), 3.87 (d, 1H), 3.70-3.77 (m, 2H), 3.44-3.49 (m, 1H), 2.87-2.93 (m, 1H), 2.65-2.73 (m, 1H), 2.52-2.57 (m, 1H). HPLC analysis (Chiralcel AD-H column, n-Hexane/*i*-PrOH = 90:10, 1.0 mL/min,  $\lambda$  = 254 nm),  $t_{\text{minor}}$  = 22.6 min,  $t_{\text{major}}$  = 26.2 min.

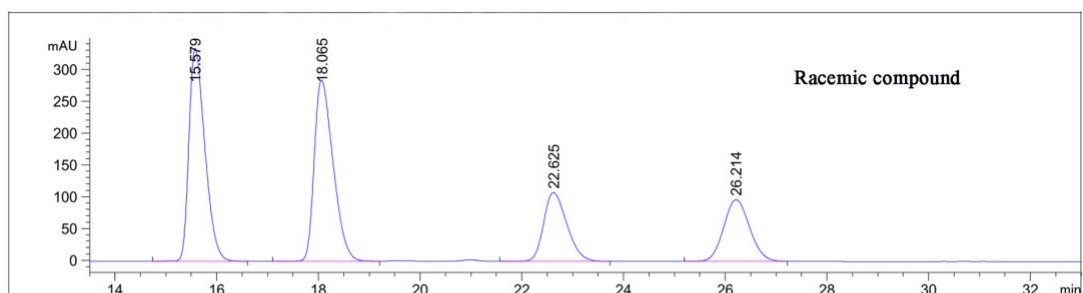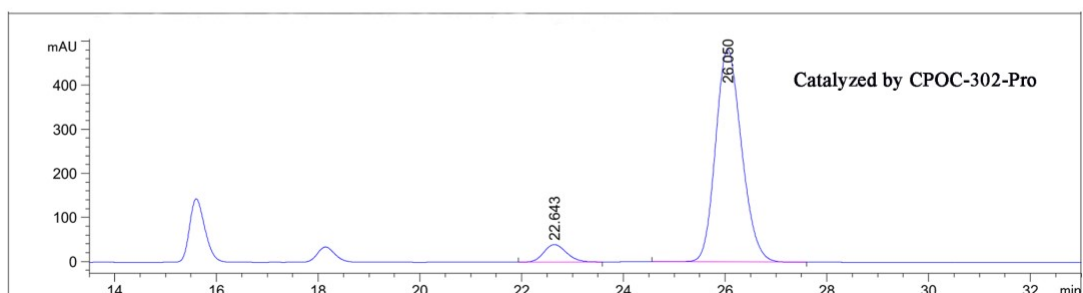

| Serial Number | Retention Time [min] | Area    | Area % |
|---------------|----------------------|---------|--------|
| 1             | 22.643               | 121308  | 6.60   |
| 2             | 26.050               | 1715741 | 93.40  |

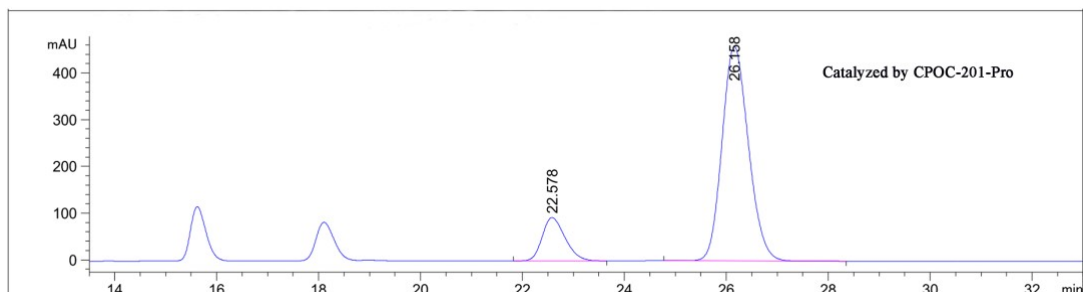

| Serial Number | Retention Time [min] | Area    | Area % |
|---------------|----------------------|---------|--------|
| 1             | 22.578               | 287445  | 14.80  |
| 2             | 26.158               | 1654121 | 85.20  |

## SUPPORTING INFORMATION

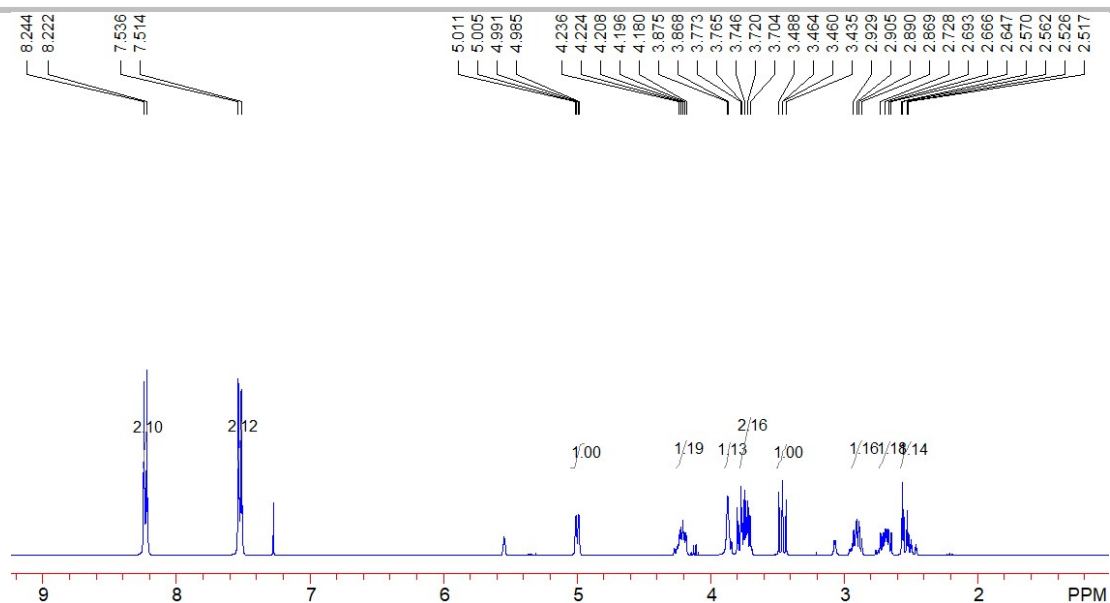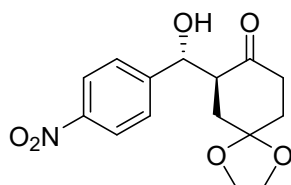

### (S)-7-((R)-hydroxy(4-nitrophenyl)methyl)-1,4-dioxaspiro[4.5]decan-8-one

$^1\text{H}$  NMR (400 MHz,  $\text{CDCl}_3$ ):  $\delta$  (ppm) = 8.22 (d, 2H), 7.51 (d, 2H), 4.93 (d, 1H), 4.08 (s, 1H), 3.86-3.97 (m, 4H), 2.96-3.02 (m, 1H), 2.69-2.77 (m, 1H), 2.44-2.50 (m, 1H), 1.94-2.09 (m, 2H), 1.71-1.78 (m, 1H), 1.48-1.53 (m, 1H). HPLC analysis (Chiralcel AS-H column, n-Hexane/*i*-PrOH = 70:30, 1.0 mL/min,  $\lambda$  = 254 nm),  $t_{\text{minor}}$  = 11.5 min,  $t_{\text{major}}$  = 16.3 min.

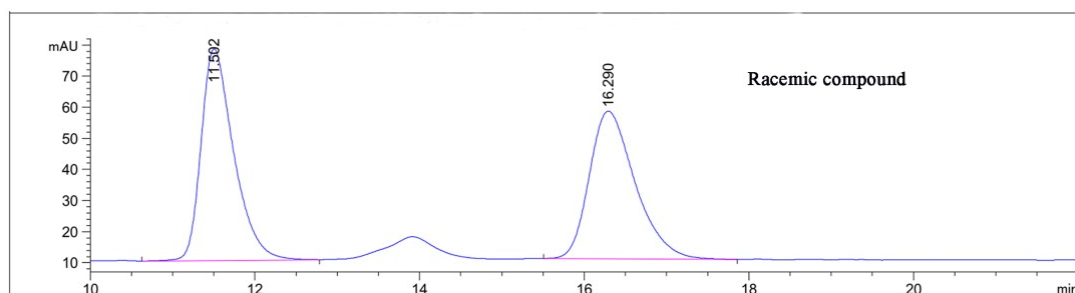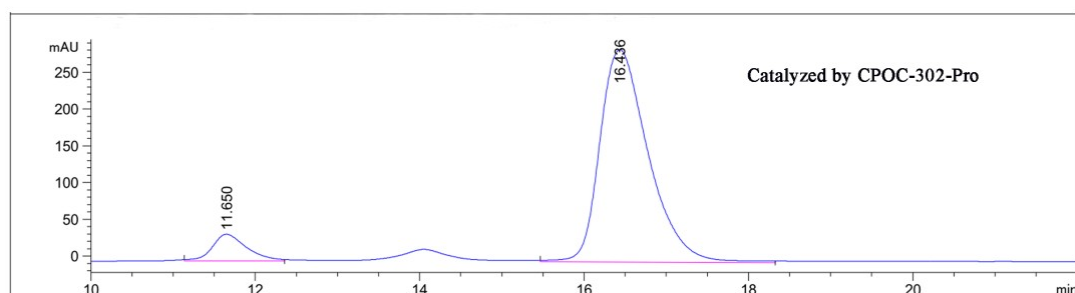



## SUPPORTING INFORMATION

| Serial Number | Retention Time [min] | Area    | Area % |
|---------------|----------------------|---------|--------|
| 1             | 11.650               | 106101  | 8.20   |
| 2             | 16.436               | 1187551 | 91.80  |

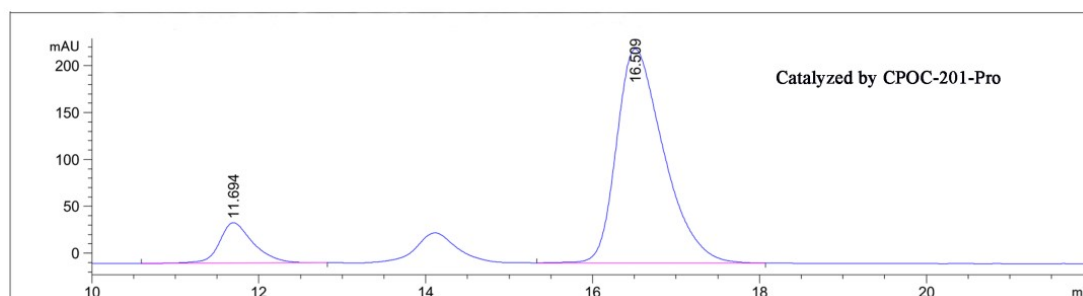

| Serial Number | Retention Time [min] | Area   | Area % |
|---------------|----------------------|--------|--------|
| 1             | 11.694               | 121668 | 11.96  |
| 2             | 16.509               | 895758 | 88.04  |

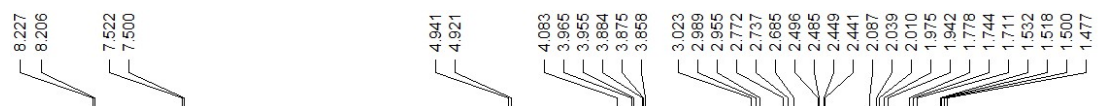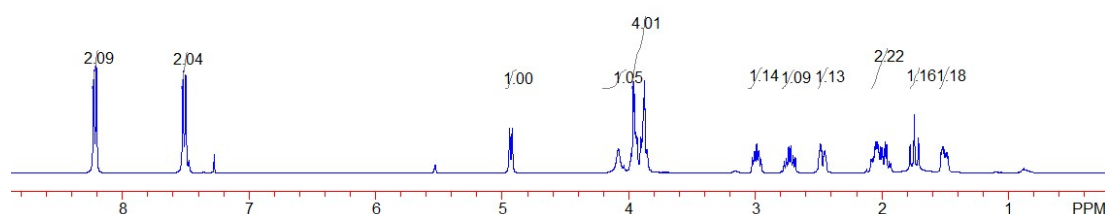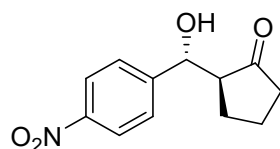

### (S)-2-((R)-hydroxy(4-nitrophenyl)methyl)cyclopentan-1-one

<sup>1</sup>H NMR (400 MHz, CDCl<sub>3</sub>): δ (ppm)= 8.20-8.23 (m, 2H), 7.51-7.55 (m, 2H), 5.43 (t, 1H), 2.61 (d, 1H), 2.36-2.52 (m, 2H), 2.11-2.19 (m, 1H), 1.96-2.07 (m, 2H), 1.70-1.76 (m, 2H). HPLC analysis (Chiralcel AD-H column, n-Hexane/*i*-PrOH = 90:10, 1.0 mL/min, λ = 254 nm), t<sub>minor</sub> = 26.7 min, t<sub>major</sub> = 28.2 min.

# SUPPORTING INFORMATION

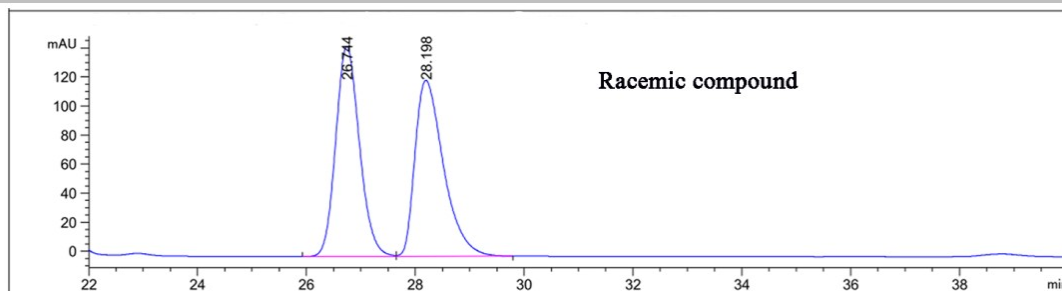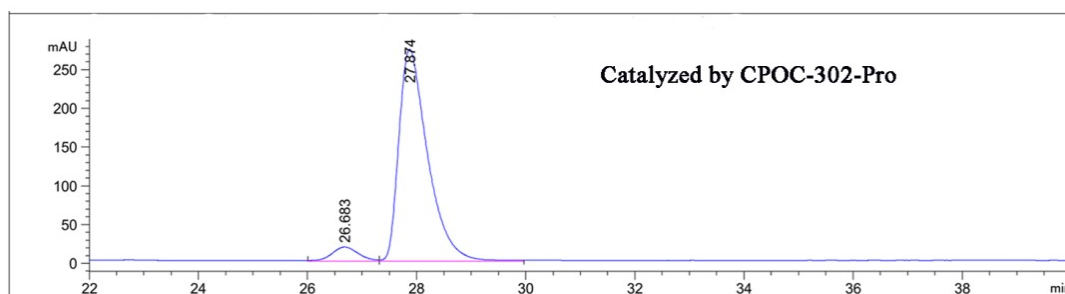

| Serial Number | Retention Time [min] | Area    | Area % |
|---------------|----------------------|---------|--------|
| 1             | 26.683               | 76968   | 6.90   |
| 2             | 27.874               | 1038201 | 93.10  |

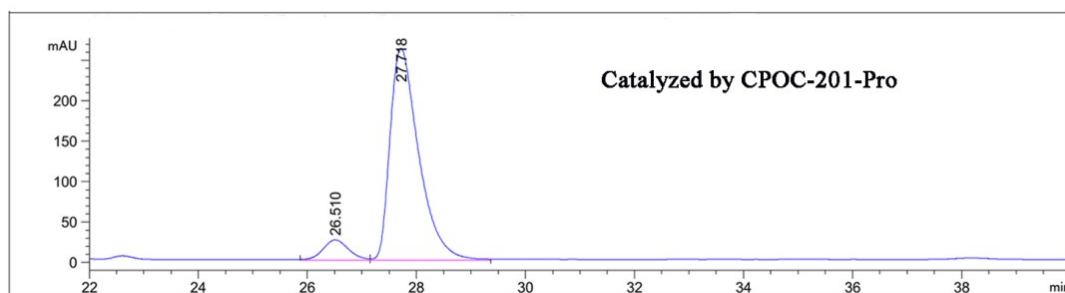

| Serial Number | Retention Time [min] | Area   | Area % |
|---------------|----------------------|--------|--------|
| 1             | 26.510               | 82909  | 7.94   |
| 2             | 27.718               | 961706 | 92.06  |

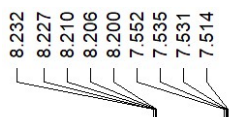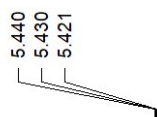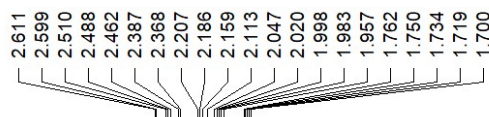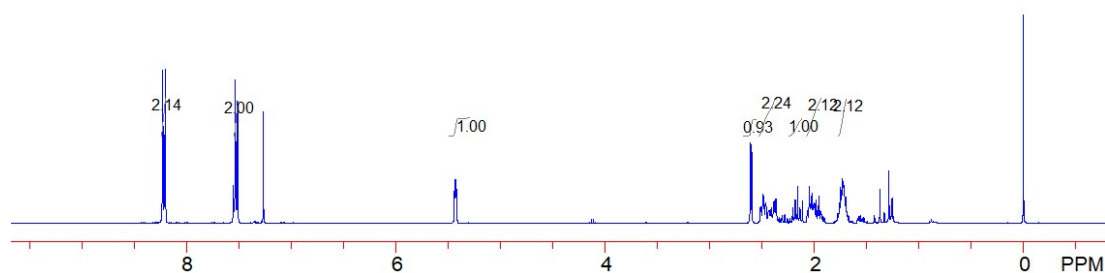

## SUPPORTING INFORMATION

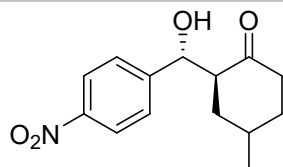

### (2S)-2-((R)-hydroxy(4-nitrophenyl)methyl)-4-methylcyclohexan-1-one

$^1\text{H}$  NMR (400 MHz,  $\text{CDCl}_3$ ):  $\delta$  (ppm) = 8.22 (d, 2H), 7.51 (d, 2H), 4.94 (d, 1H), 3.98 (s, 1H), 2.72-2.78 (m, 1H), 2.39-2.59 (m, 2H), 2.09-2.10 (m, 1H), 1.92-1.98 (m, 1H), 1.77-1.81 (m, 1H), 1.56-1.63 (m, 1H), 1.26-1.34 (m, 1H), 1.06 (d, 3H). HPLC analysis (Chiralcel OD-H column, n-Hexane/i-PrOH = 90:10, 1.0 mL/min,  $\lambda$  = 254 nm),  $t_{\text{minor}}$  = 23.2 min,  $t_{\text{major}}$  = 28.2 min.

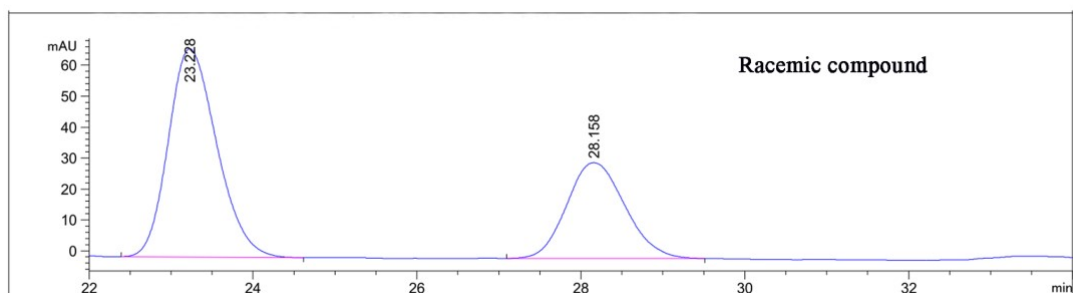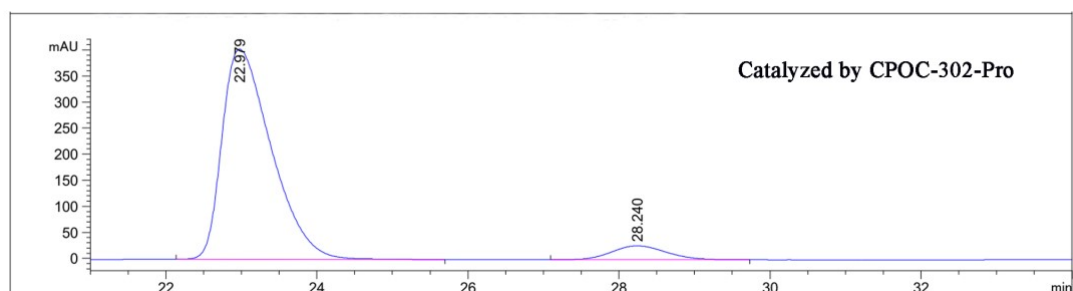

| Serial Number | Retention Time [min] | Area    | Area % |
|---------------|----------------------|---------|--------|
| 1             | 22.979               | 1826091 | 93.15  |
| 2             | 28.240               | 134333  | 6.85   |

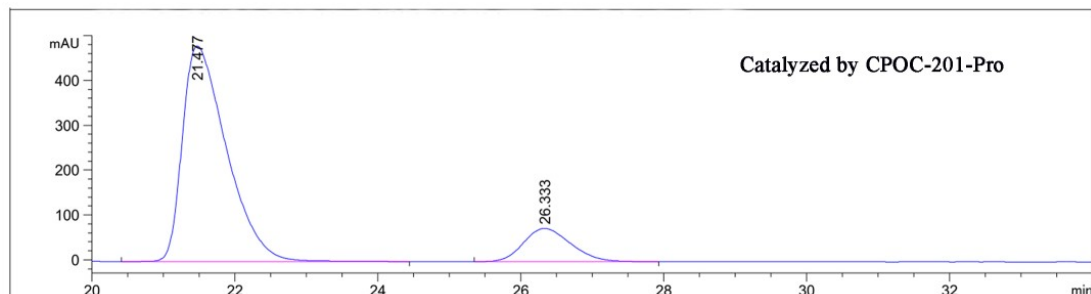

| Serial Number | Retention Time [min] | Area    | Area % |
|---------------|----------------------|---------|--------|
| 1             | 21.477               | 2059801 | 85.81  |
| 2             | 26.333               | 340666  | 14.19  |

## SUPPORTING INFORMATION

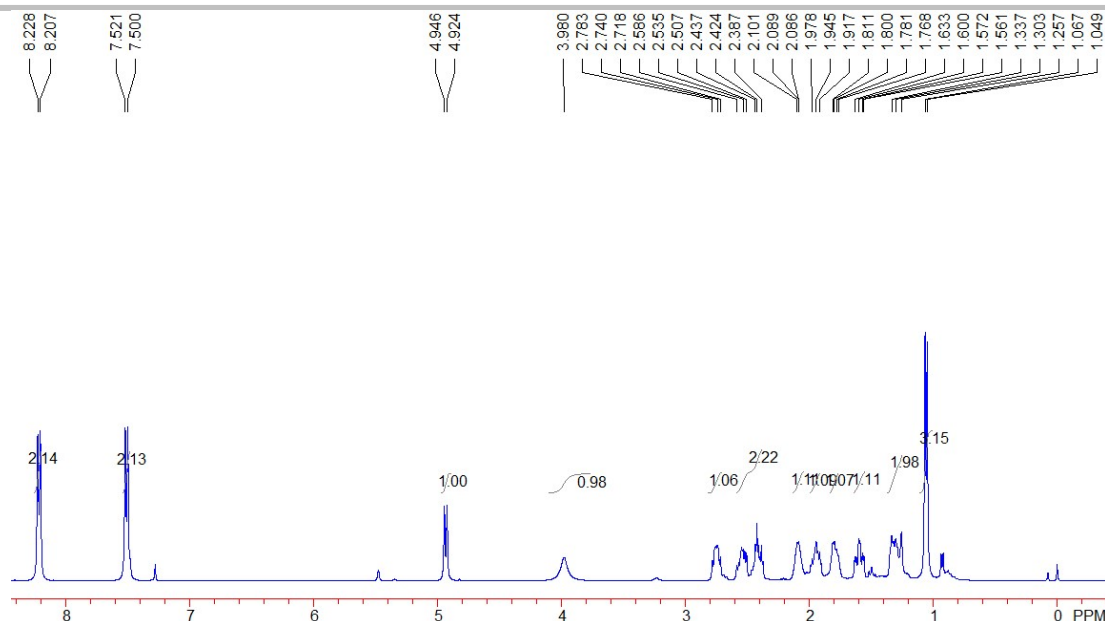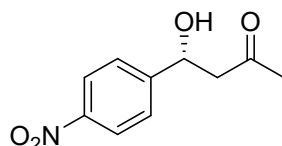

### (R)-4-hydroxy-4-(4-nitrophenyl)butan-2-one

$^1\text{H}$  NMR (400 MHz,  $\text{CDCl}_3$ ):  $\delta$  (ppm)= 8.22 (d, 2H), 7.55 (d, 2H), 5.25-5.29 (m, 1H), 3.63 (d, 1H), 2.85-2.87 (m, 2H), 2.23 (s, 3H). HPLC analysis (Chiralcel AS-H column, n-Hexane/*i*-PrOH = 70:30, 1.0 mL/min,  $\lambda$  = 254 nm),  $t_{\text{major}}$  = 9.7 min,  $t_{\text{minor}}$  = 12.3 min.

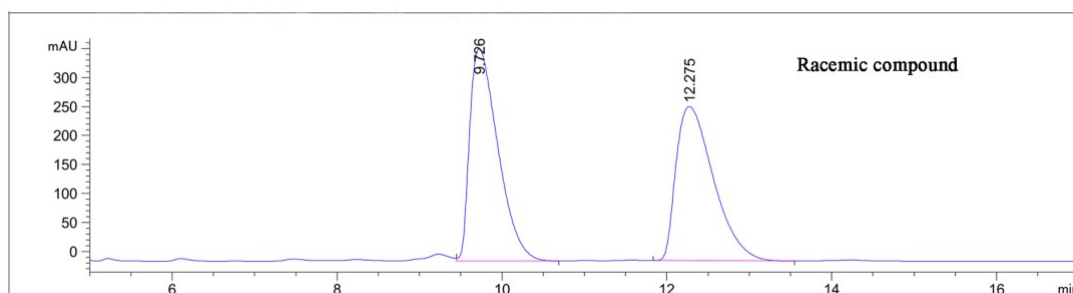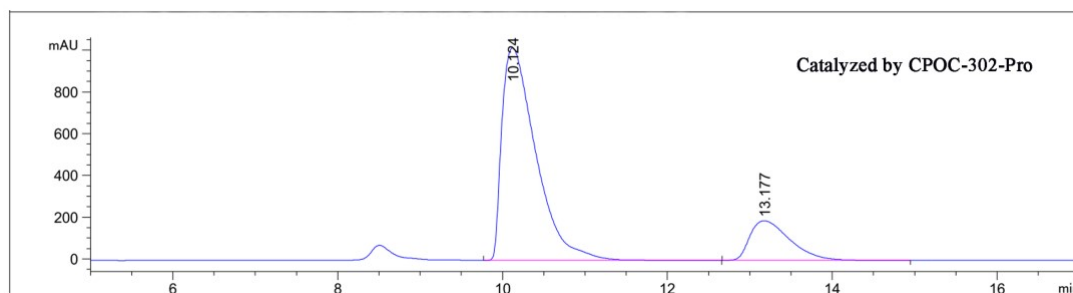

| Serial Number | Retention Time [min] | Area    | Area % |
|---------------|----------------------|---------|--------|
| 1             | 10.124               | 2901571 | 82.15  |
| 2             | 13.177               | 630295  | 17.85  |

## SUPPORTING INFORMATION

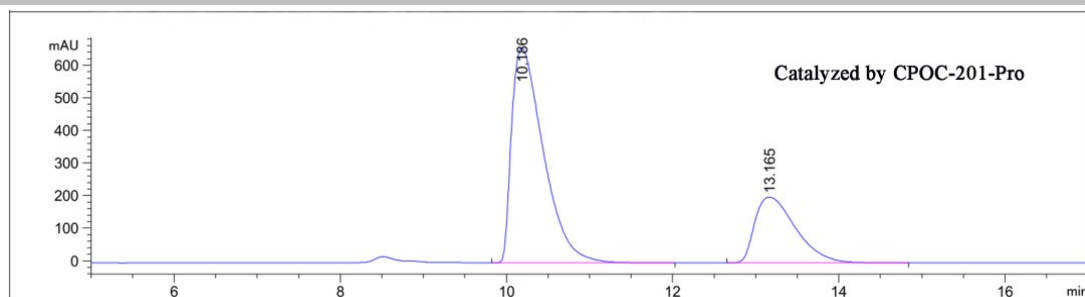

| Serial Number | Retention Time [min] | Area    | Area % |
|---------------|----------------------|---------|--------|
| 1             | 10.186               | 1748691 | 71.86  |
| 2             | 13.165               | 684886  | 28.14  |

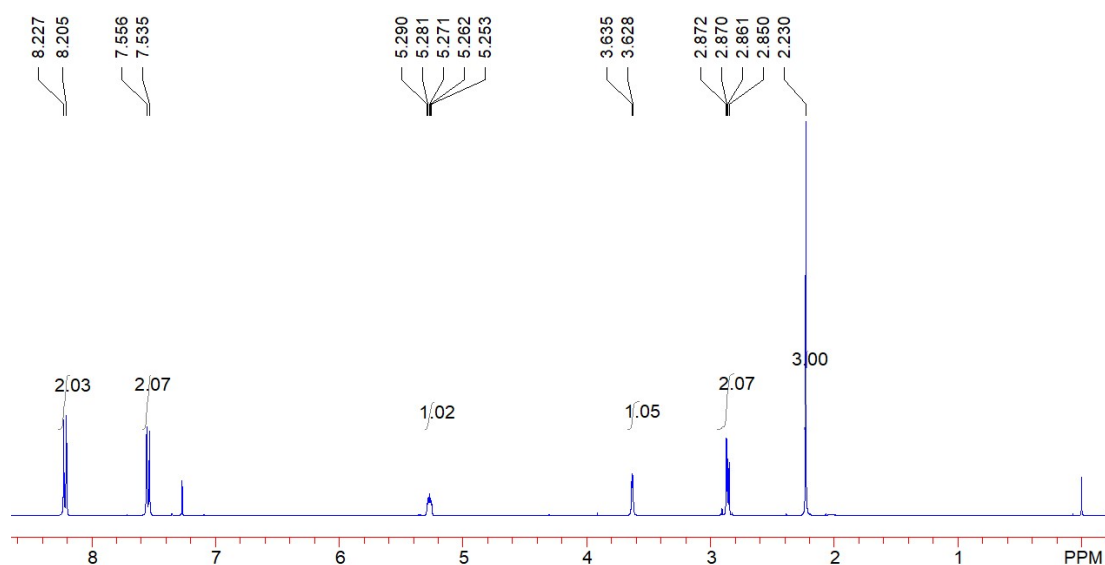

### 2.4 2D NOESY experiments

For NOESY experiments with the mixture of CPOC-302-Pro and the reactant (*p*-nitrobenzaldehyde or cyclohexanone), 0.05 mmol of the reactant was added to a solution of CPOC-302-Pro (20 mg CPOC-302-Pro in 1.0 mL CDCl<sub>3</sub>). After stirring for half an hour at room temperature, the mixture was carried out for the NOESY experiments.

## SUPPORTING INFORMATION

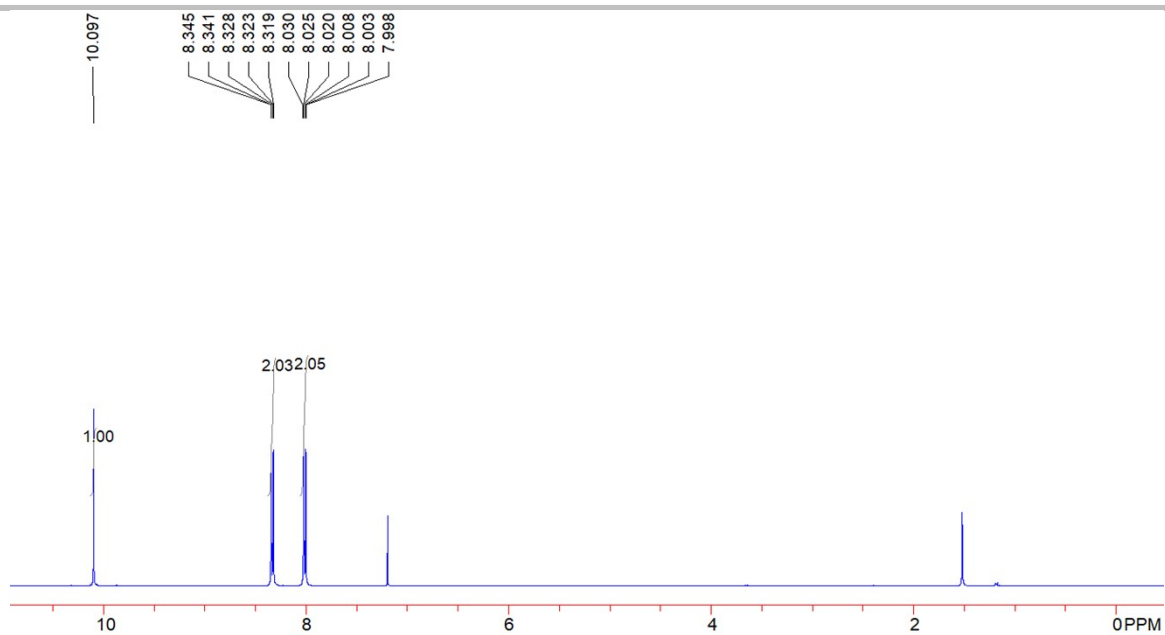

**Figure S22.**  $^1\text{H}$  NMR spectrum of *p*-nitrobenzaldehyde ( $\text{CDCl}_3$ , 400 MHz).

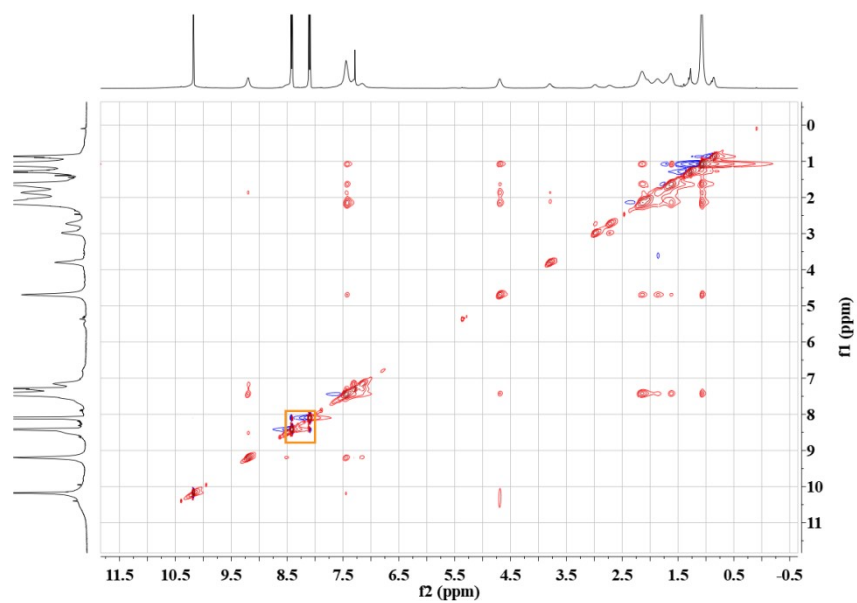

**Figure S23.** 2D NOESY NMR spectrum (400 MHz,  $\text{CDCl}_3$ , 298 K) of the mixture of CPOC-302-Pro and *p*-nitrobenzaldehyde. Expansion of marked area (in orange rectangle) is reported below.

## SUPPORTING INFORMATION

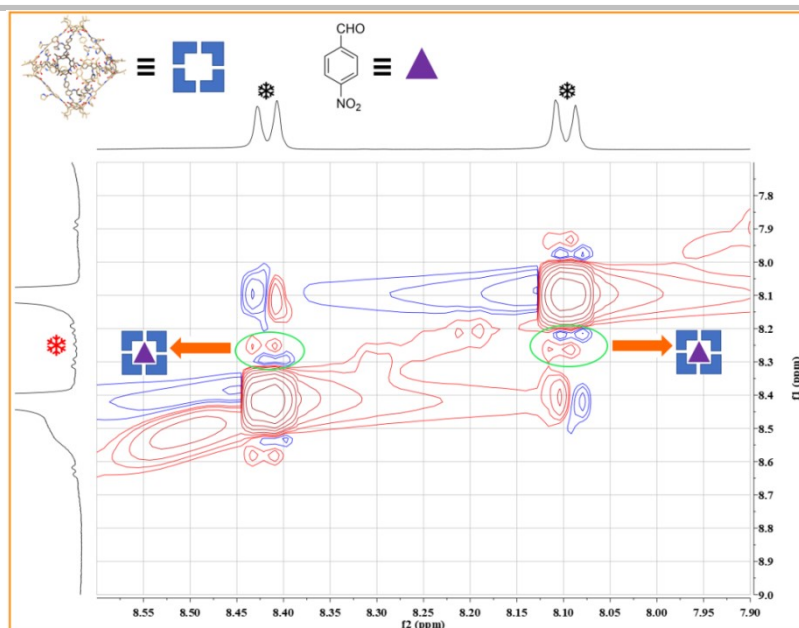

**Figure S24.** Enlarged view of the orange rectangle in the 2D NOESY NMR spectrum of the mixture of CPOC-302-Pro and *p*-nitrobenzaldehyde. Exchange peaks between aromatic protons of *p*-nitrobenzaldehyde outside the cavity (indicated with black snowflakes) and inside the cavity (indicated with a red snowflake) are shown.

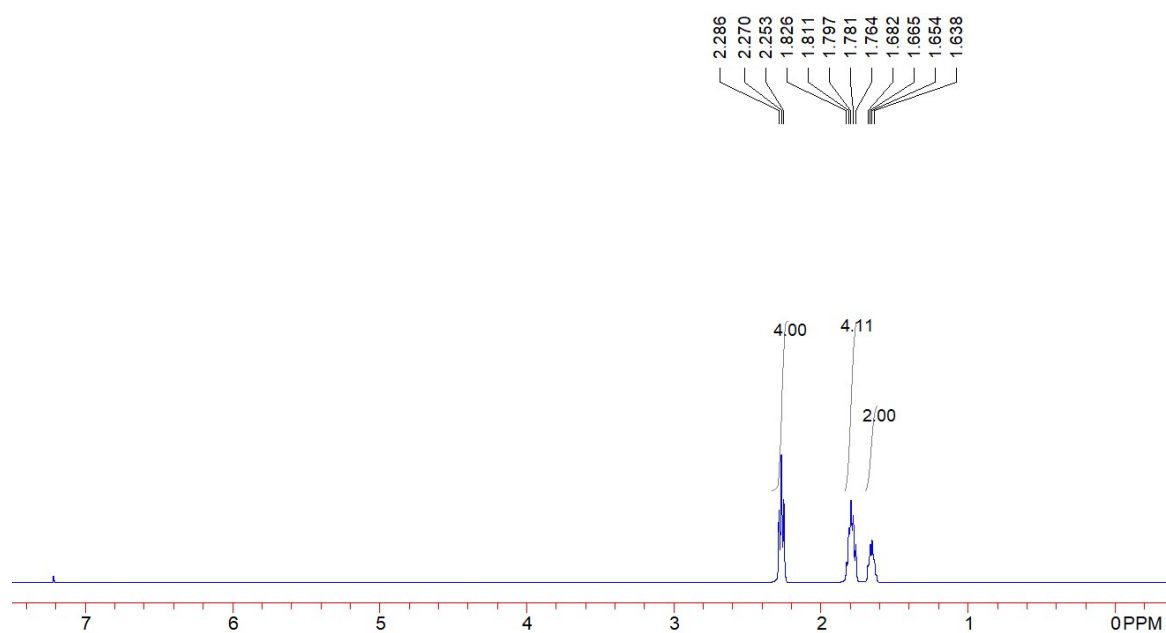

**Figure S25.**  $^1\text{H}$  NMR spectrum of cyclohexanone ( $\text{CDCl}_3$ , 400 MHz).

## SUPPORTING INFORMATION

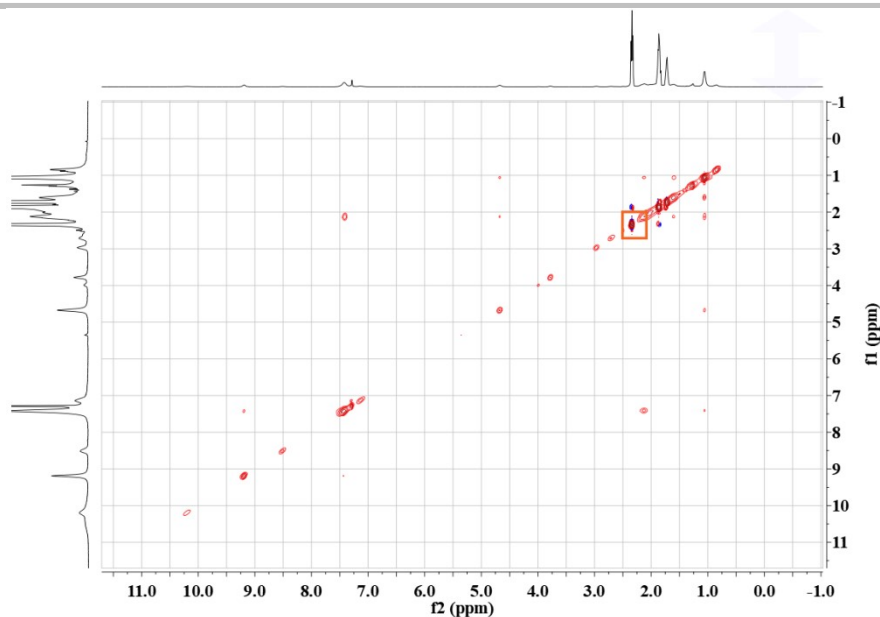

**Figure S26.** 2D NOESY NMR spectrum (400 MHz,  $\text{CDCl}_3$ , 298 K) of the mixture of CPOC-302-Pro and cyclohexanone. Expansion of marked area (in orange rectangle) is reported below.

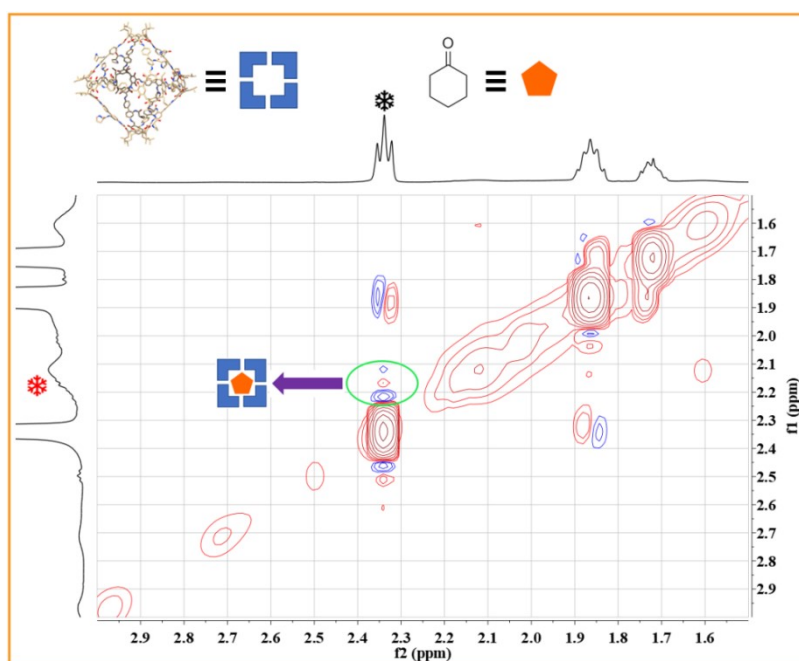

**Figure S27.** Enlarged view of the orange rectangle in the 2D NOESY NMR spectrum of the mixture of CPOC-302-Pro and cyclohexanone. Exchange peaks between methylene protons (the  $\alpha$  position) of cyclohexanone outside the cavity (indicated with a black snowflakes) and inside the cavity (indicated with a red snowflake) are shown.



## SUPPORTING INFORMATION

### 2.5 Size selectivity study of CPOC-302-Pro

#### Synthesis of 5-formyl-2-nitrophenyl-3,5-di-tert-butylbenzoate

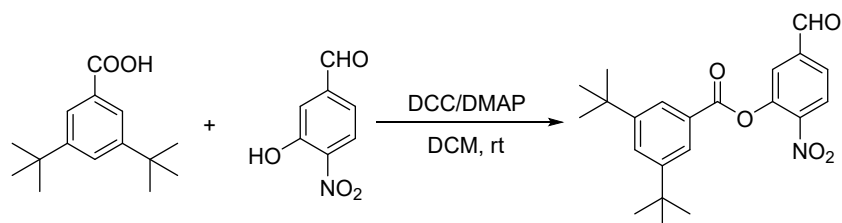

To a solution of 3,5-di-tert-butylbenzoic acid (703 mg, 3.0 mmol) in dry dichloromethane (12 mL) was added DCC (680 mg, 3.3 mmol), DMAP (403 mg, 3.3 mmol) under 0 °C and stirred for 1 h. 3-hydroxy-4-nitrobenzaldehyde (501 mg, 3.0 mmol) in 10 mL dichloromethane was added slowly and the mixture was stirred at room temperature for 12 h. After the reaction was completed, the reaction mixture was filtered and the obtained solution was concentrated under reduced pressure. The crude product was purified by chromatography on silica gel with petroleum ether/ethyl acetate (5/1, v/v) as the eluent to afford the product 5-formyl-2-nitrophenyl 3,5-di-tert-butylbenzoate as white solids in 90% yield.  $^1\text{H NMR}$  (400 MHz,  $\text{CDCl}_3$ ):  $\delta$  (ppm)= 10.12 (s, 1H), 8.26 (d, 1H), 8.04 (d, 2H), 7.95 (d, 2H), 7.76 (s, 1H), 1.39 (s, 18H).

For size selectivity study, two sets of reactions were performed. The procedures are similar to the above catalytic reactions. Under the optimal reaction conditions, 0.20 mmol 5-formyl-2-nitrophenyl 3,5-di-tert-butylbenzoate and 2.0 mmol cyclohexanone were reacted at room temperature in presence of model catalyst BPP and CPOC-302-Pro, respectively. After two days, the corresponding product was isolated by fast column chromatography with petroleum ether/ethyl acetate (6/1, v/v) as the eluent.

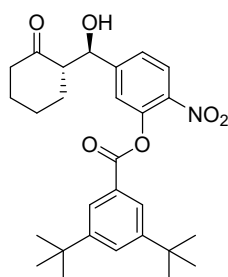

#### 5-((R)-hydroxy((S)-2-oxocyclohexyl)methyl)-2-nitrophenyl 3,5-di-tert-butylbenzoate

$^1\text{H NMR}$  (400 MHz,  $\text{CDCl}_3$ ):  $\delta$  (ppm)= 8.12 (d, 1H), 8.04 (d, 2H), 7.74 (t, 1H), 7.40 (d, 1H), 7.35 (d, 1H), 5.49 (s, 1H), 3.30 (s, 1H), 2.64-2.69 (m, 1H), 2.38-2.50 (m, 2H), 2.08-2.13 (m, 1H), 1.87-1.90 (m, 1H), 1.54-1.75 (m, 4H), 1.38 (s, 18H).

## SUPPORTING INFORMATION

### 2.6 Catalytic recycle test of CPOC-302-Pro

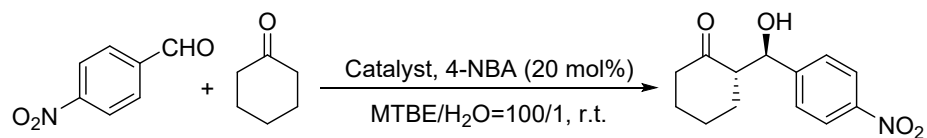

| Run | catalyst     | Time (d) | yield (%) | anti/syn | ee (%) |
|-----|--------------|----------|-----------|----------|--------|
| 1   | CPOC-302-Pro | 2        | 99        | 93:7     | 92     |
| 2   | CPOC-302-Pro | 2        | 96        | 93:7     | 92     |
| 3   | CPOC-302-Pro | 2        | 95        | 92:8     | 92     |
| 4   | CPOC-302-Pro | 2        | 93        | 92:8     | 92     |
| 5   | CPOC-302-Pro | 2        | 90        | 91:9     | 90     |

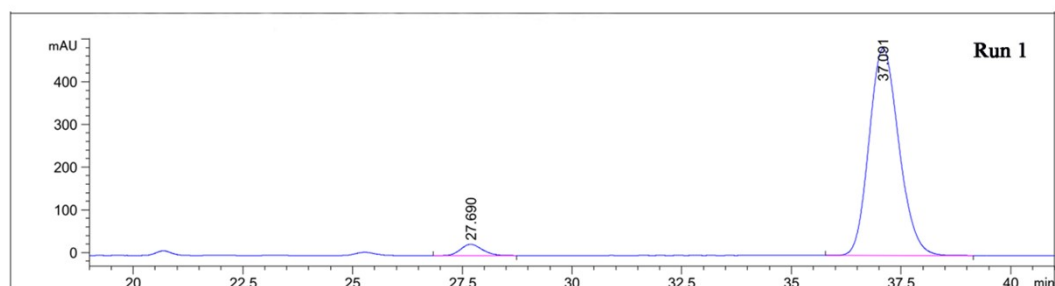

| Serial Number | Retention Time [min] | Area    | Area % |
|---------------|----------------------|---------|--------|
| 1             | 27.690               | 89561   | 3.77   |
| 2             | 37.091               | 2286381 | 96.23  |

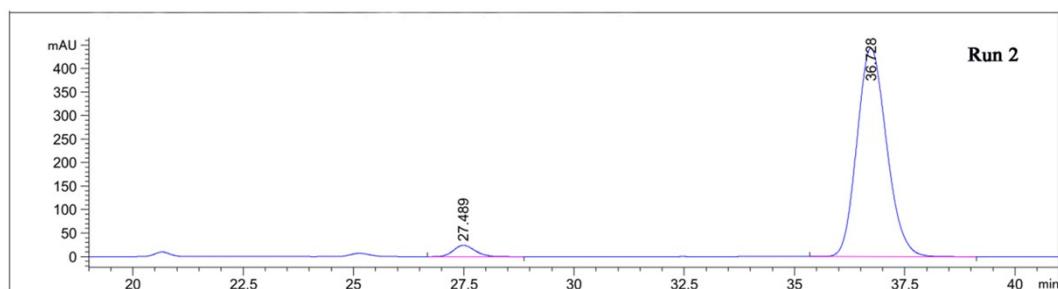

| Serial Number | Retention Time [min] | Area    | Area % |
|---------------|----------------------|---------|--------|
| 1             | 27.489               | 81424   | 3.79   |
| 2             | 36.728               | 2066973 | 96.21  |

## SUPPORTING INFORMATION

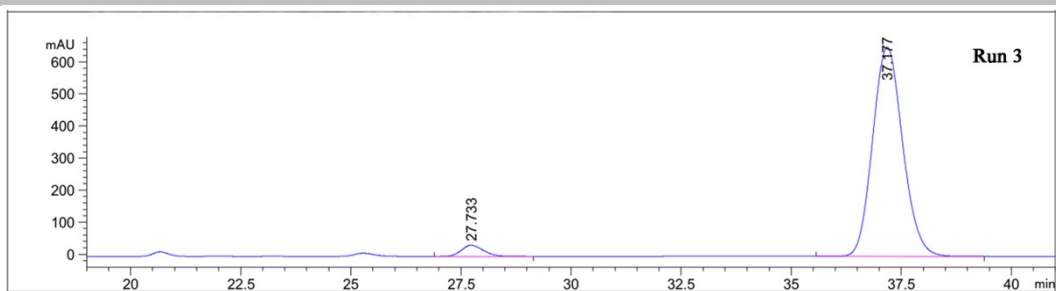

| Serial Number | Retention Time [min] | Area    | Area % |
|---------------|----------------------|---------|--------|
| 1             | 27.733               | 121744  | 3.80   |
| 2             | 37.177               | 3082045 | 96.20  |

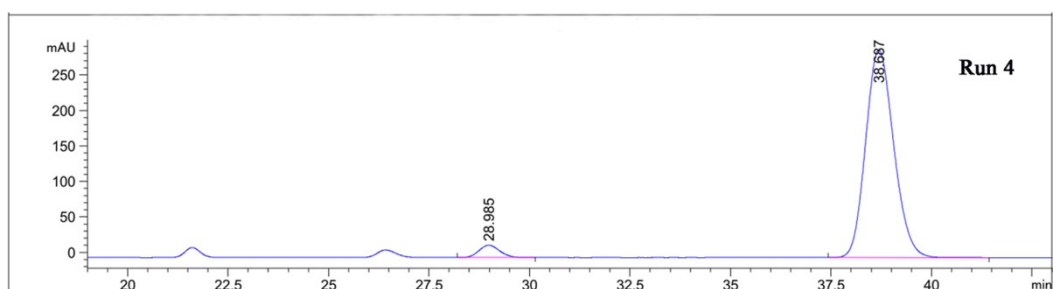

| Serial Number | Retention Time [min] | Area    | Area % |
|---------------|----------------------|---------|--------|
| 1             | 28.985               | 62236   | 4.20   |
| 2             | 38.687               | 1419931 | 95.80  |

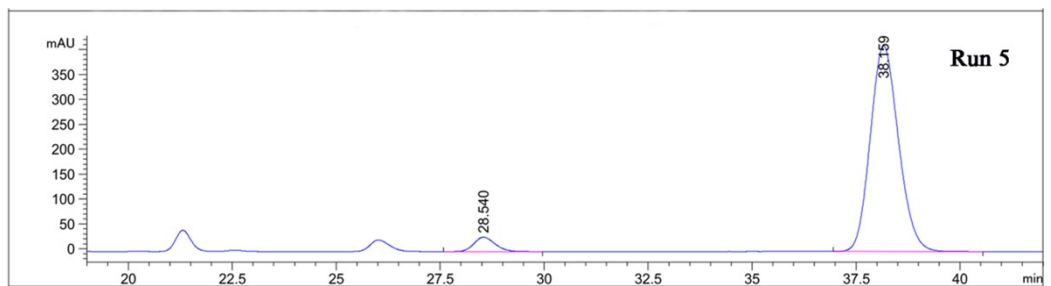

| Serial Number | Retention Time [min] | Area    | Area % |
|---------------|----------------------|---------|--------|
| 1             | 28.540               | 102052  | 4.98   |
| 2             | 38.159               | 1947361 | 95.02  |

# SUPPORTING INFORMATION

## 2.7 $^1\text{H}$ , $^{13}\text{C}$ NMR spectra and mass spectra of the precursor molecules

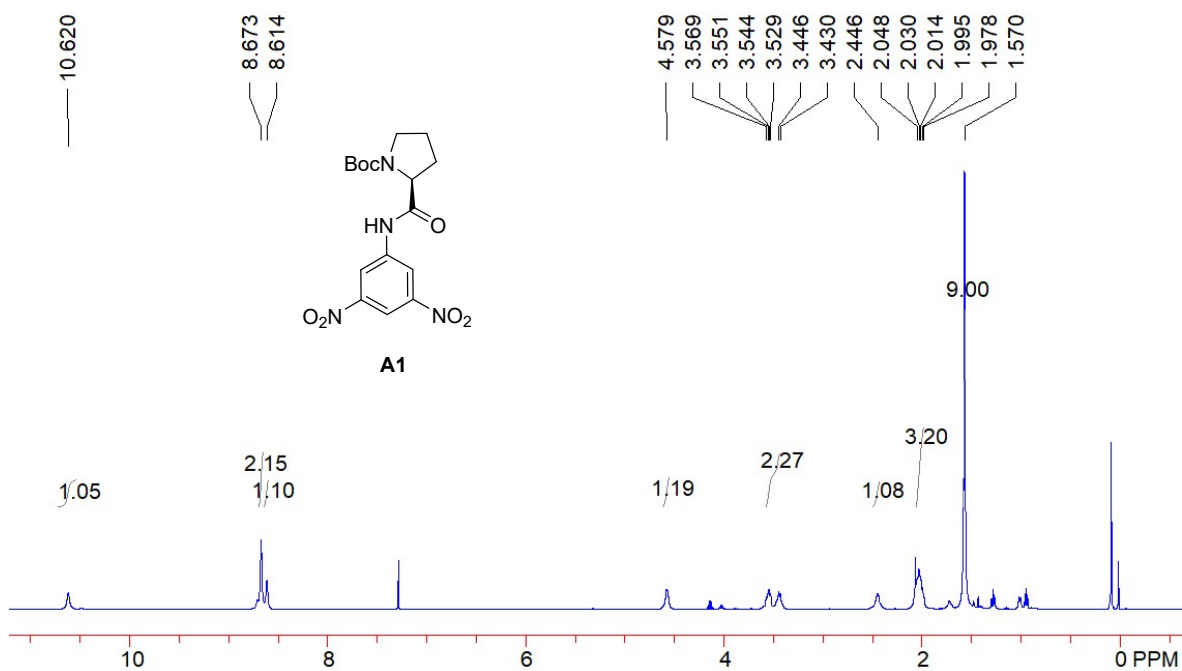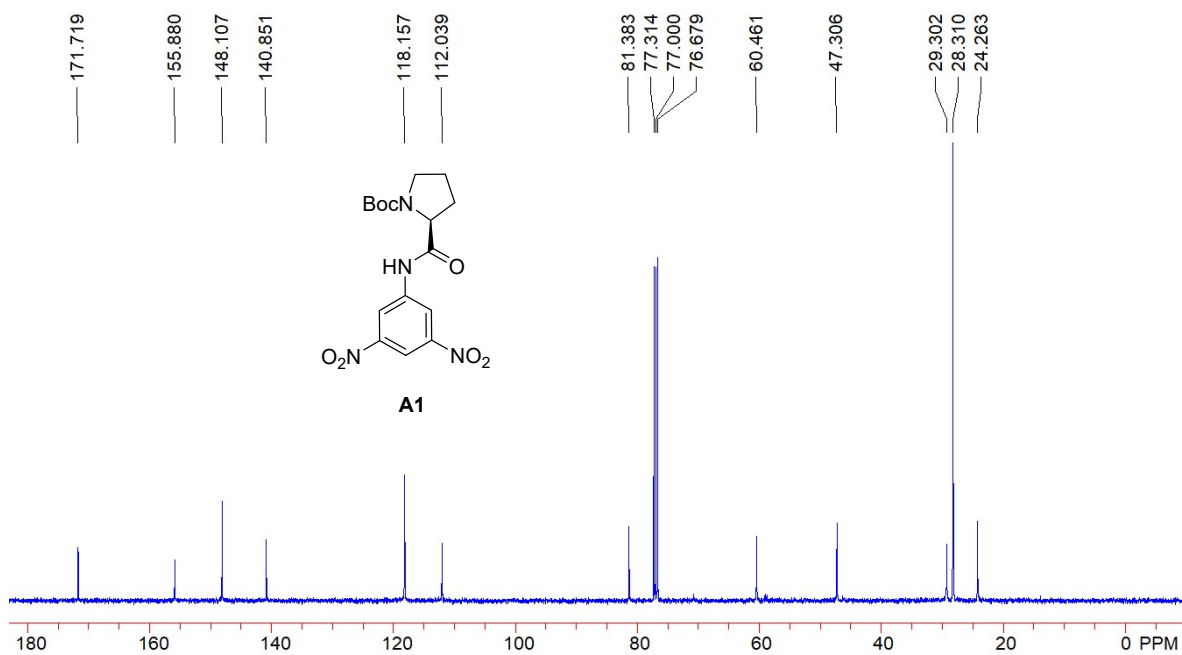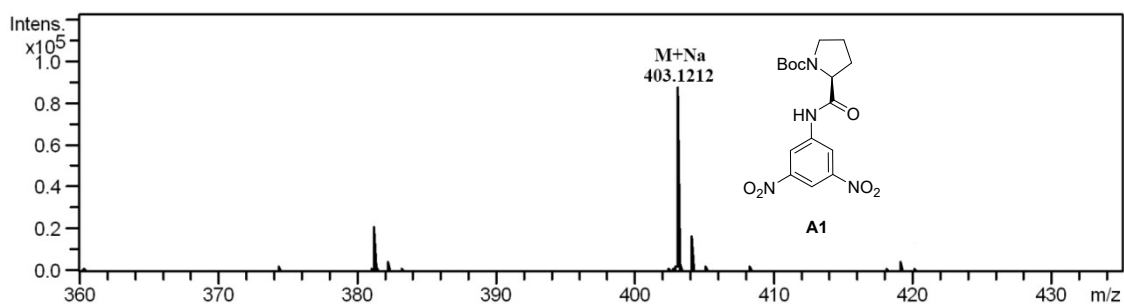

# SUPPORTING INFORMATION

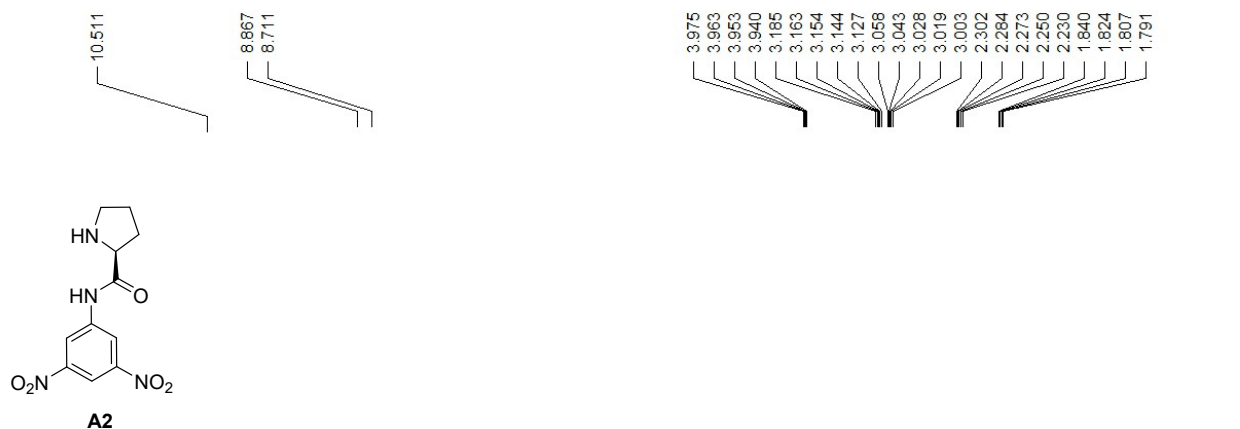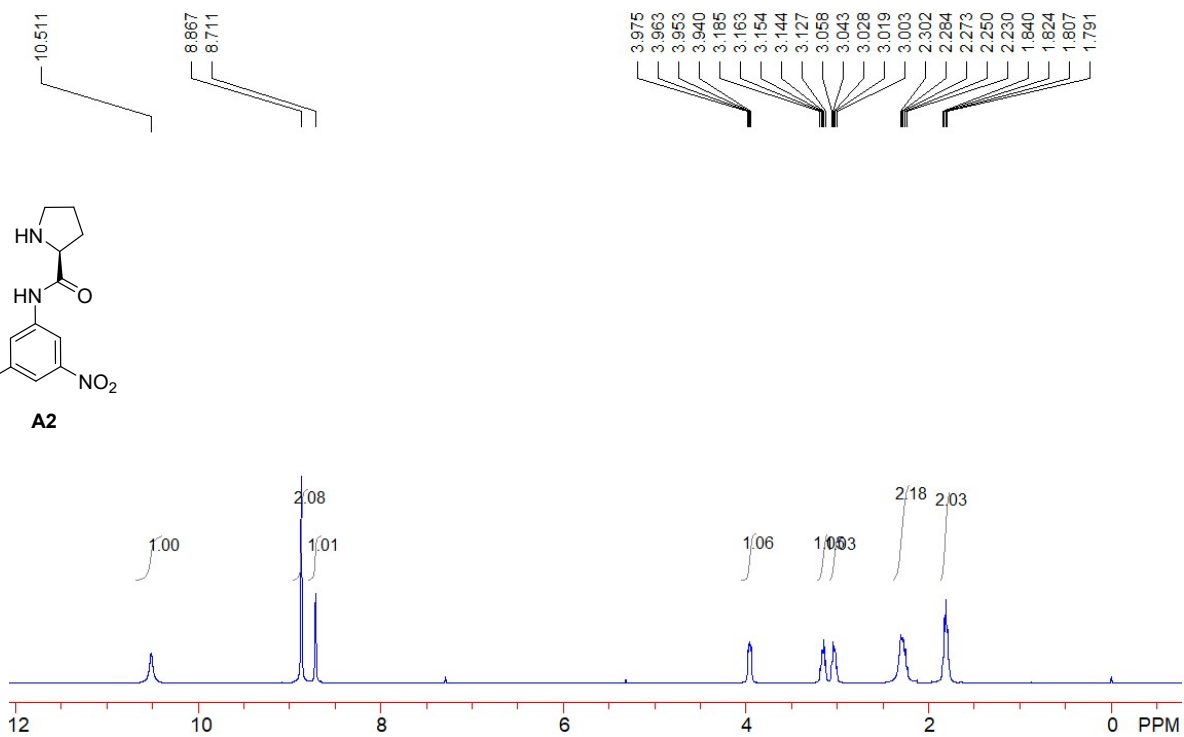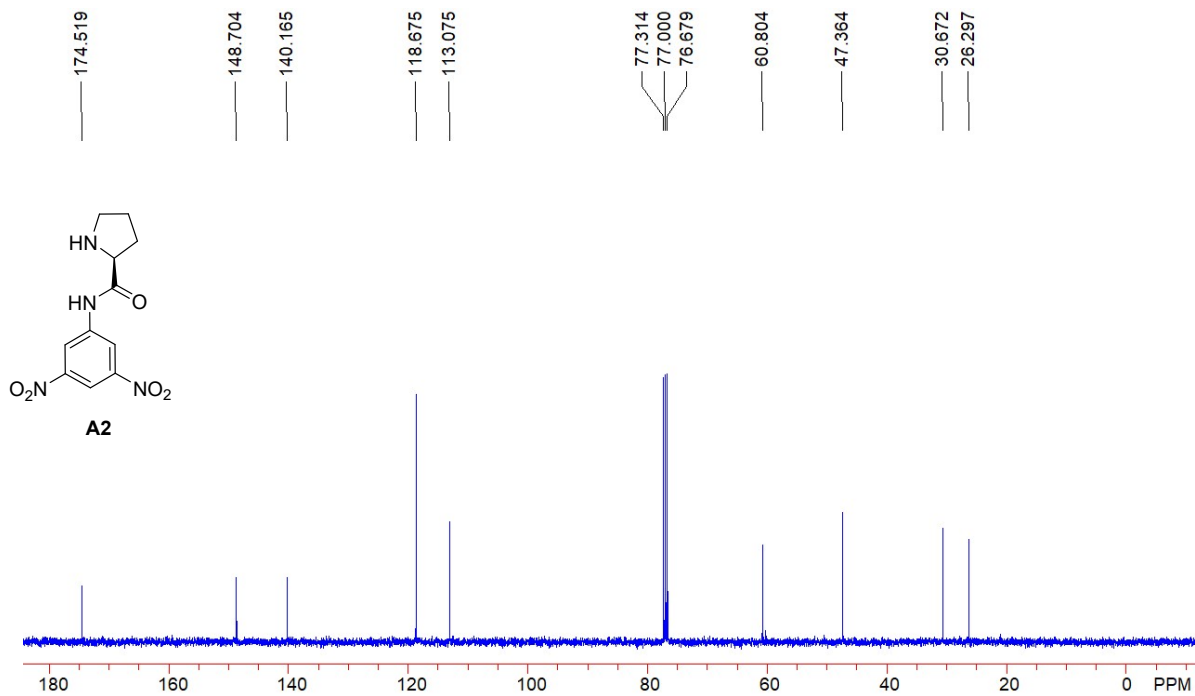

# SUPPORTING INFORMATION

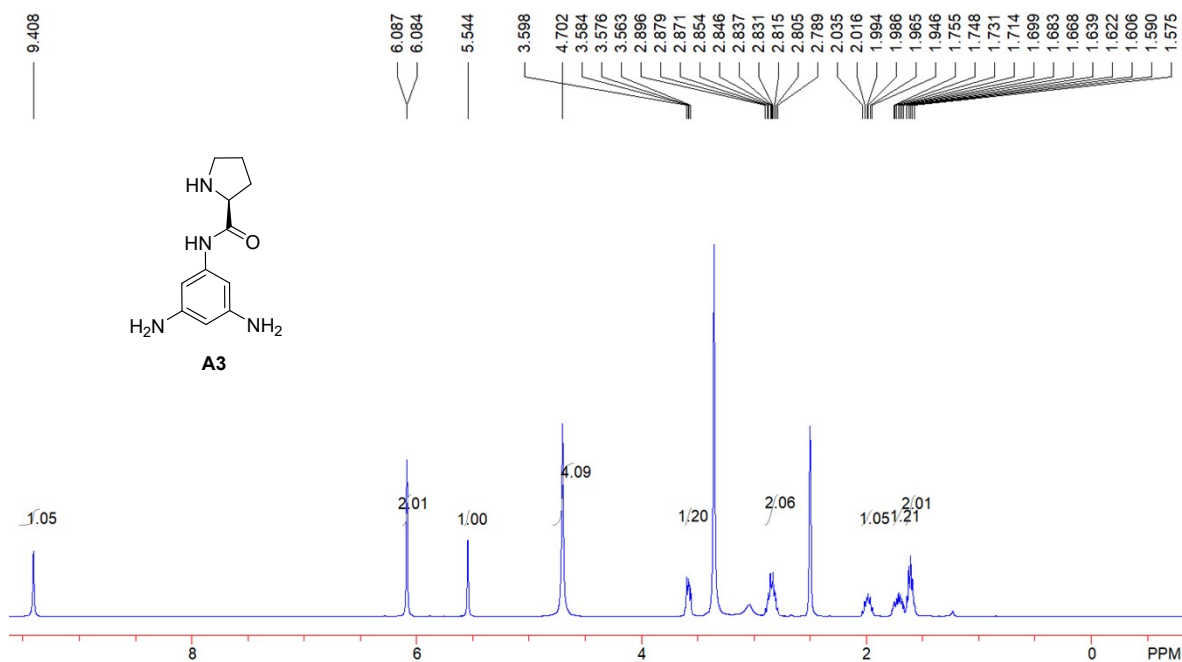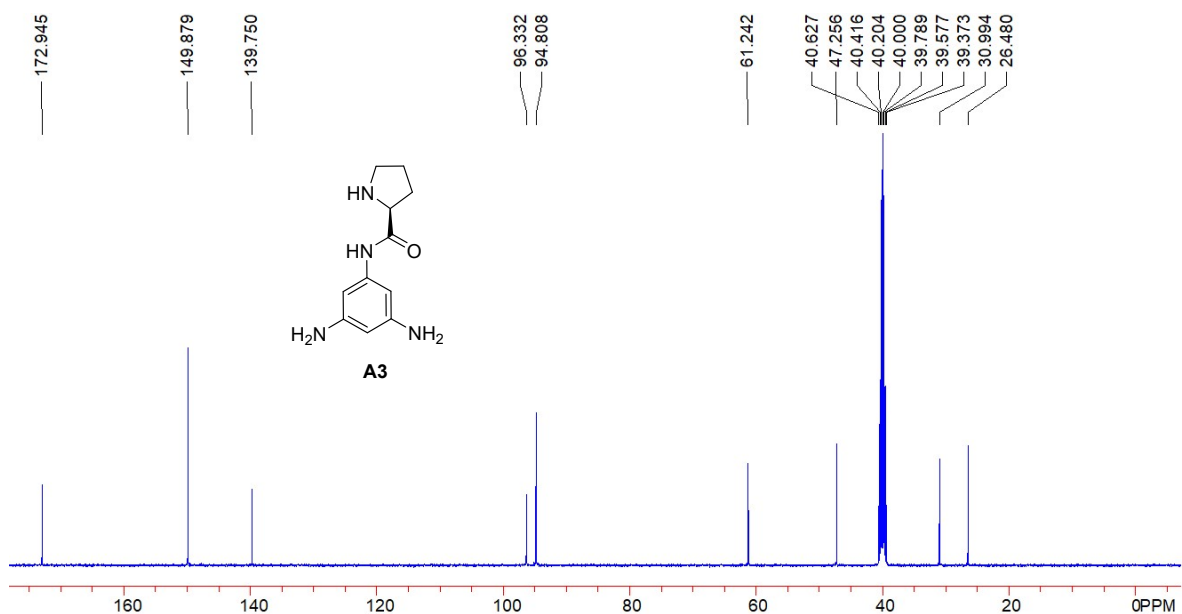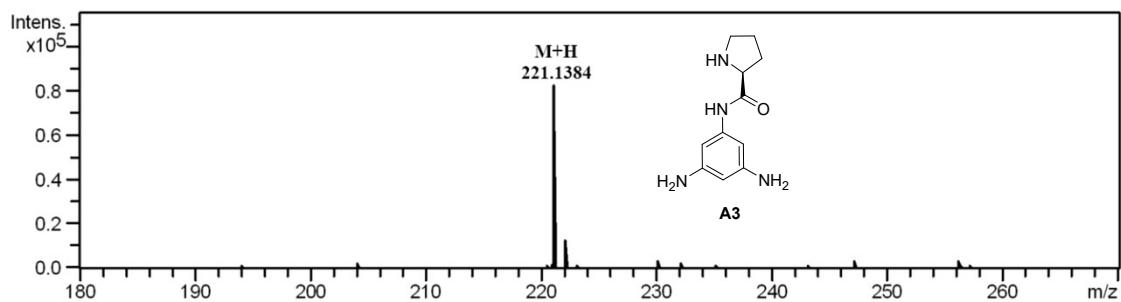

# SUPPORTING INFORMATION

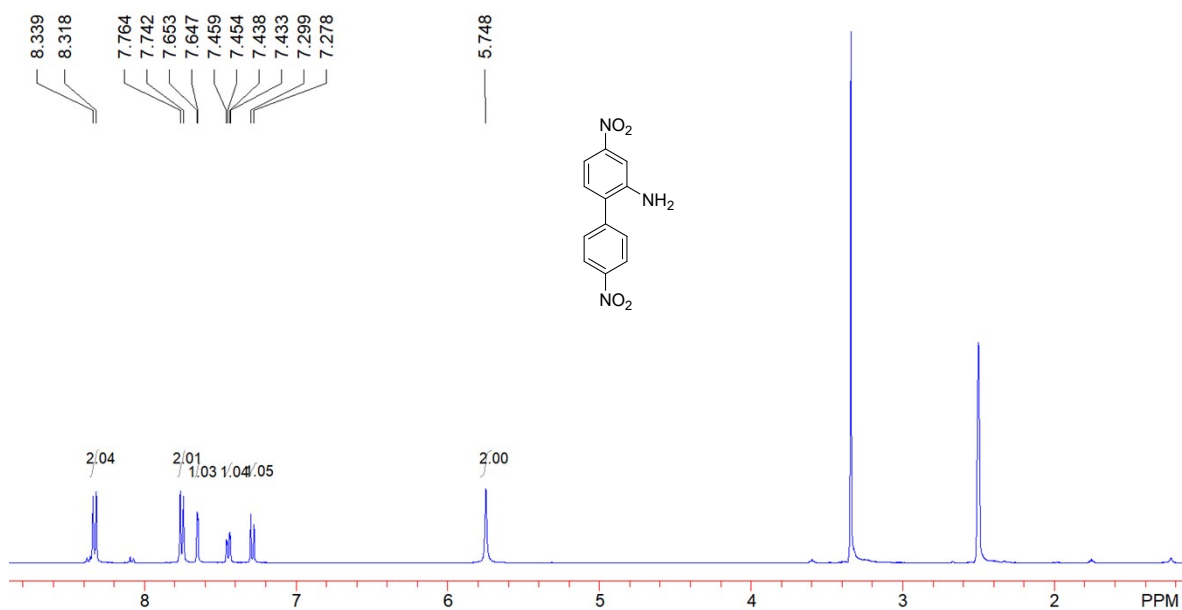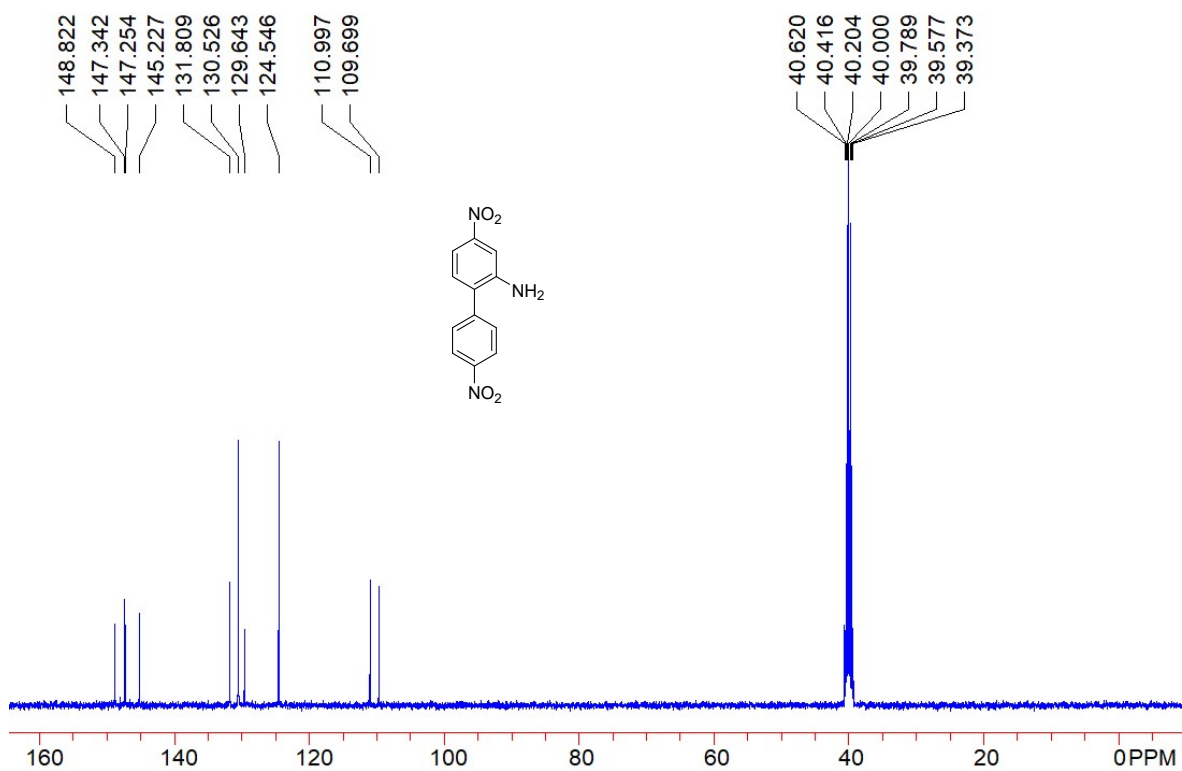

# SUPPORTING INFORMATION

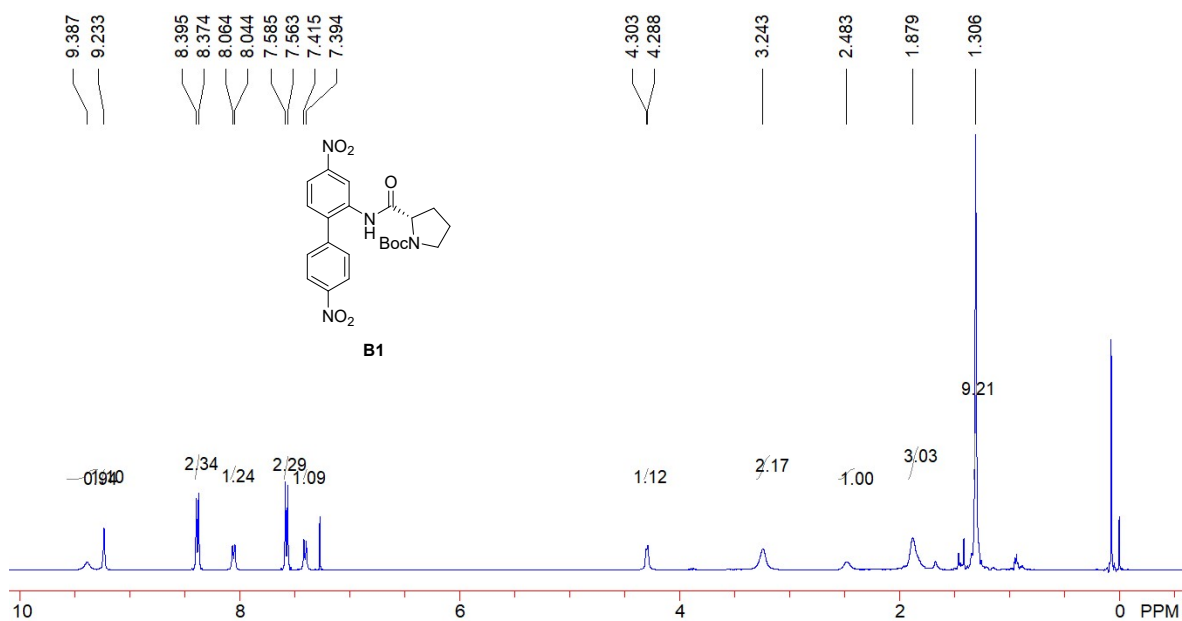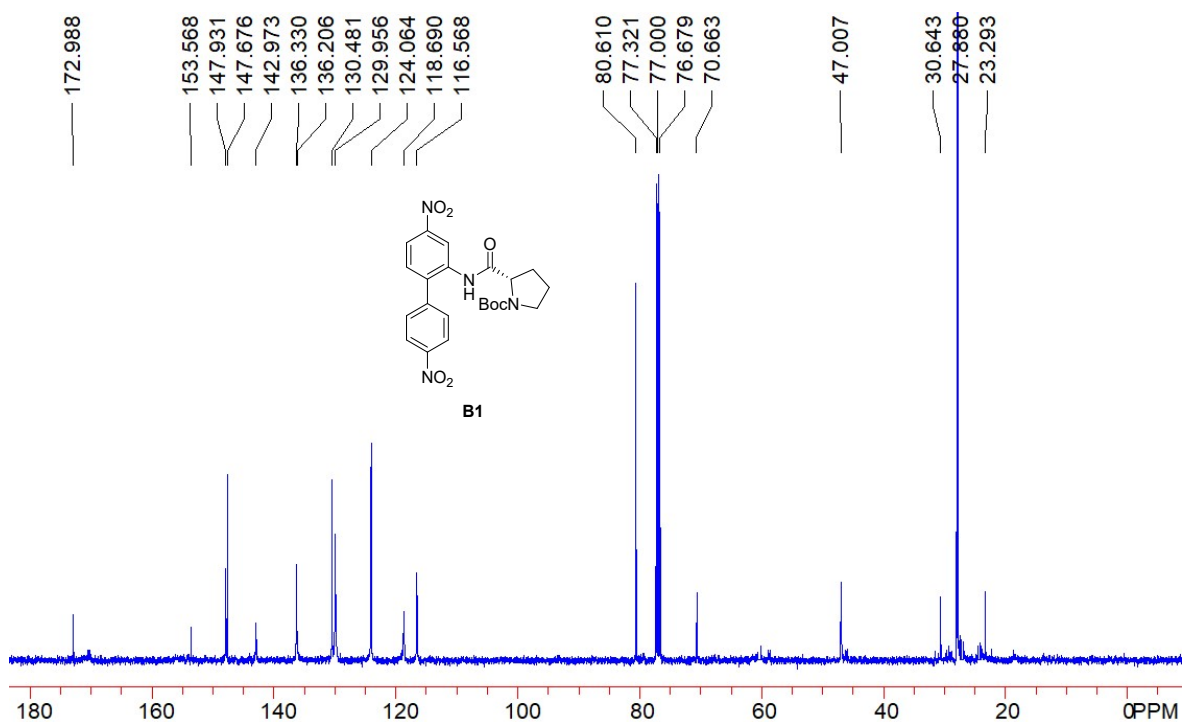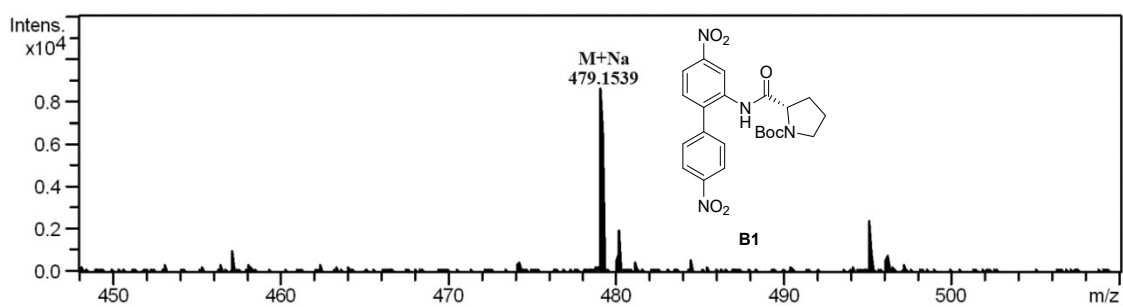



# SUPPORTING INFORMATION

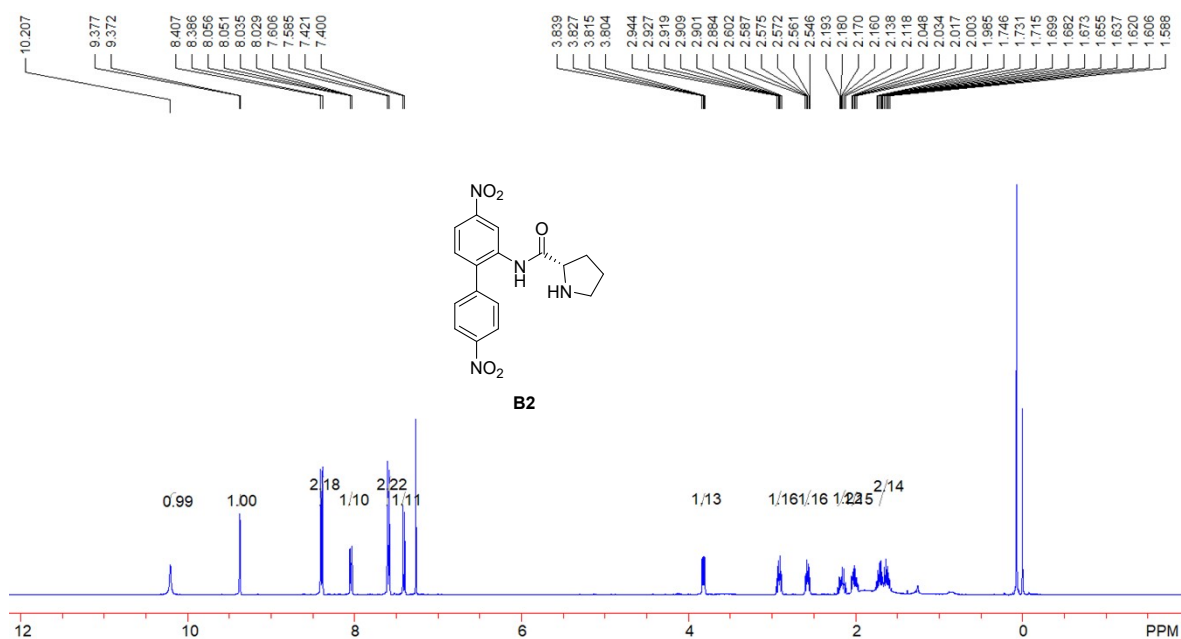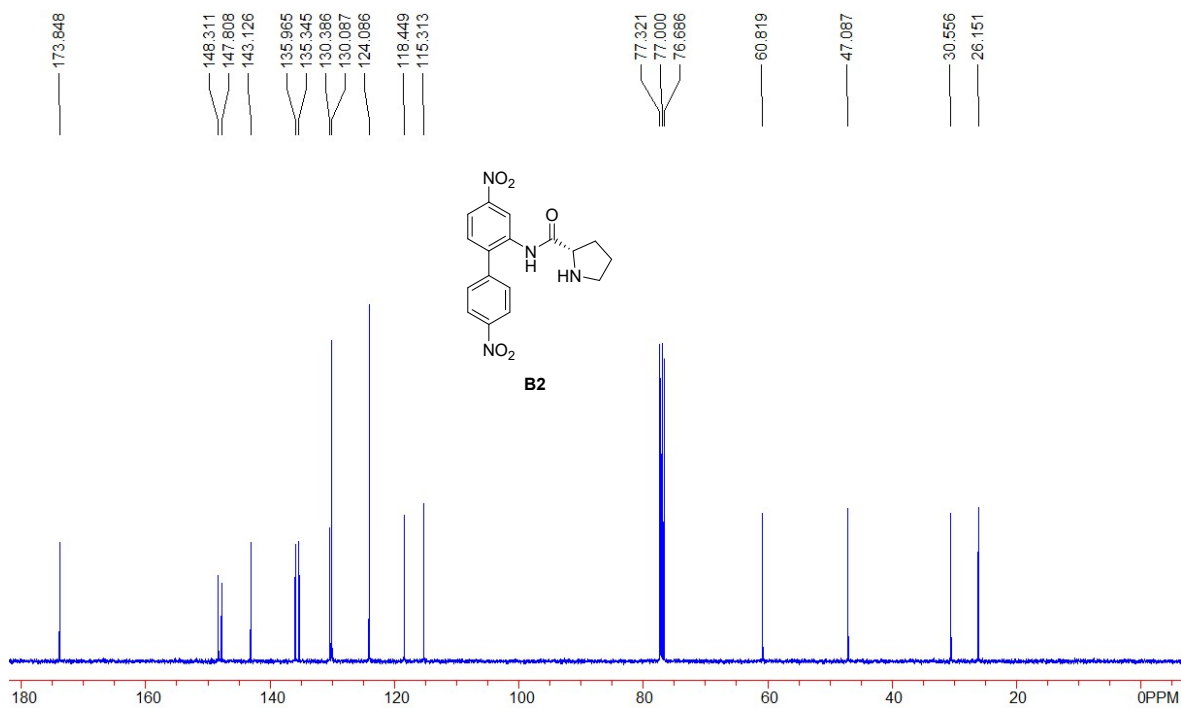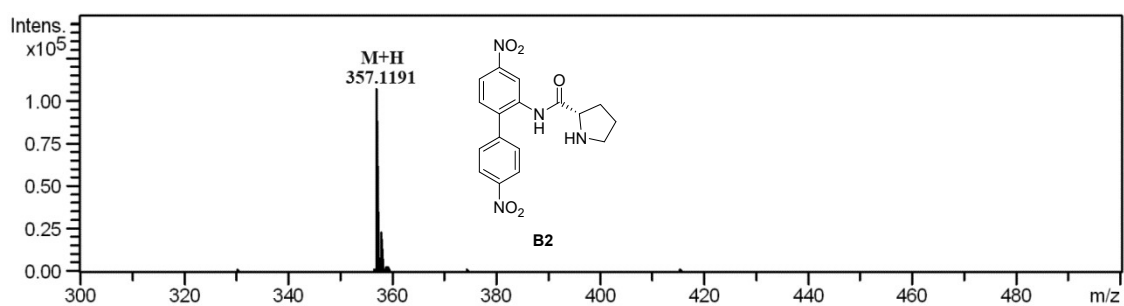

# SUPPORTING INFORMATION

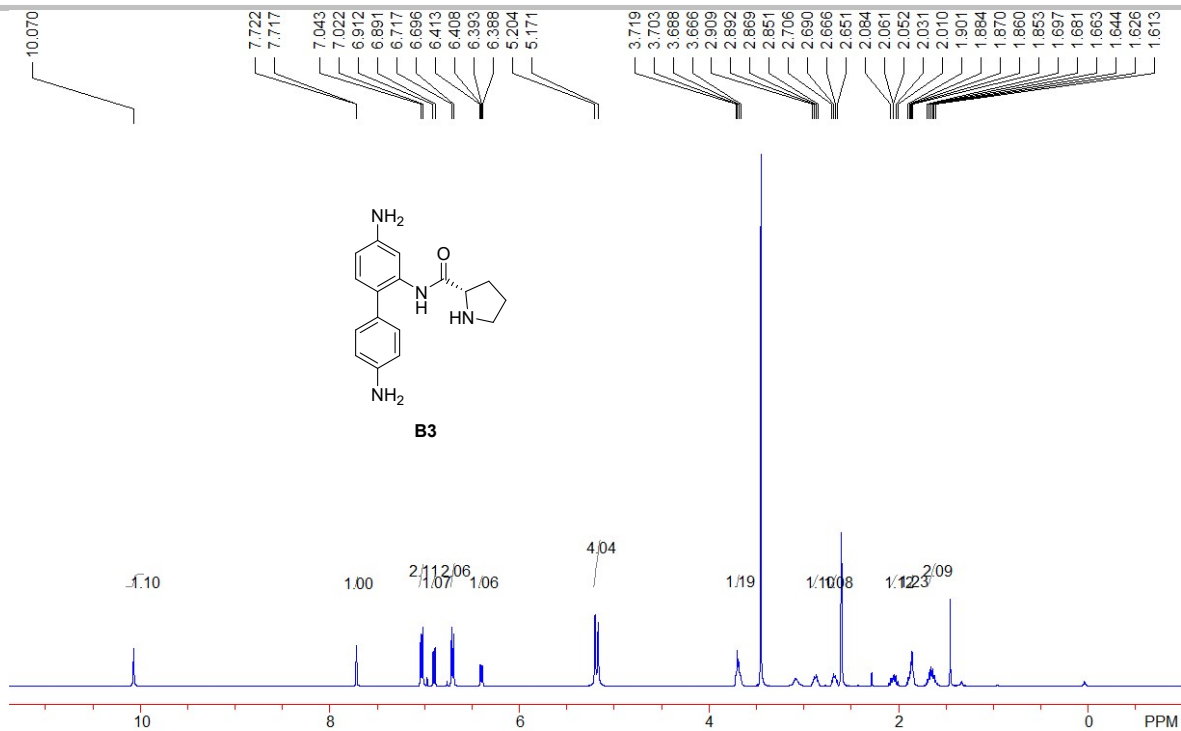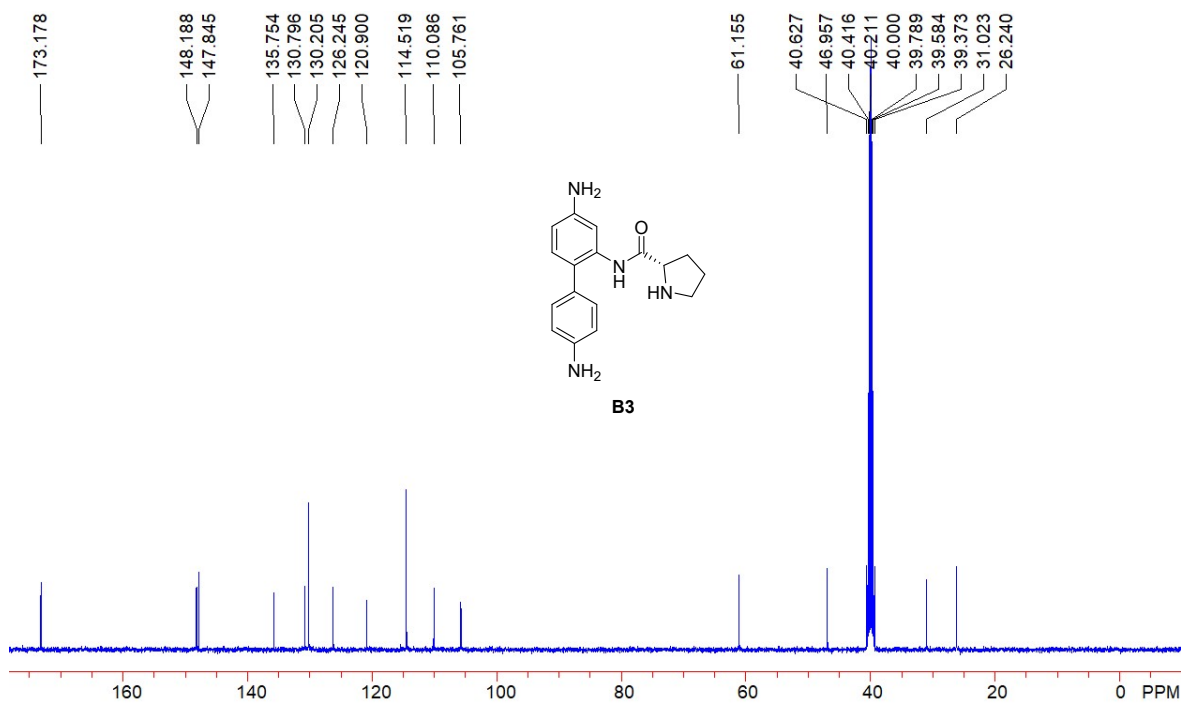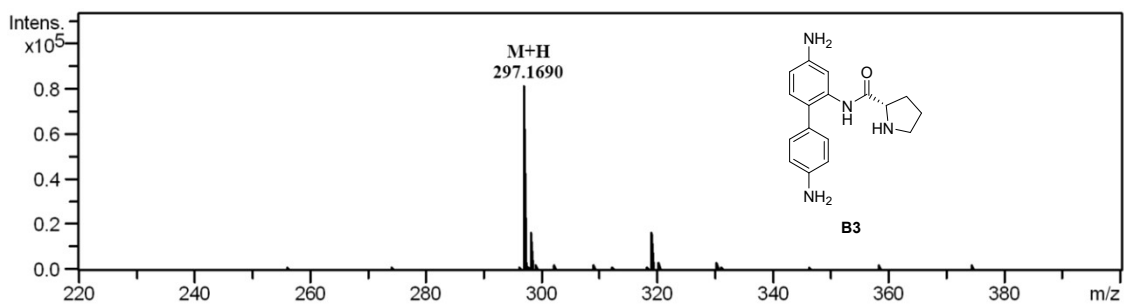

# SUPPORTING INFORMATION

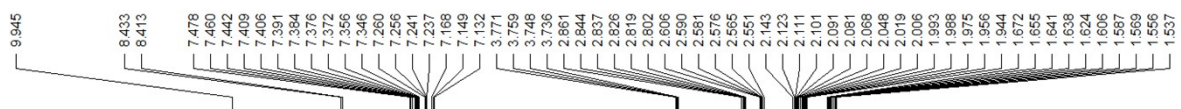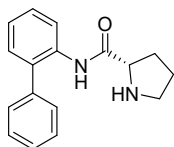

**BPP**

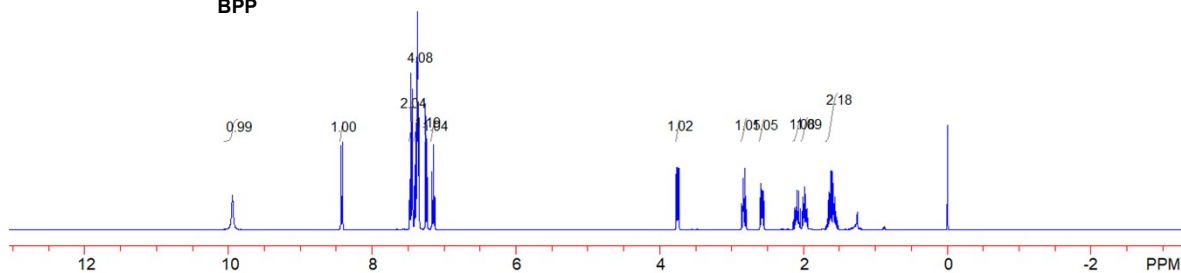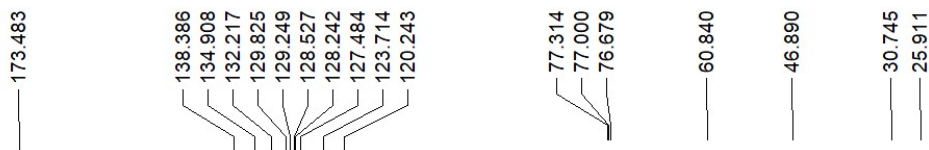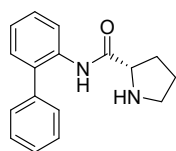

**BPP**

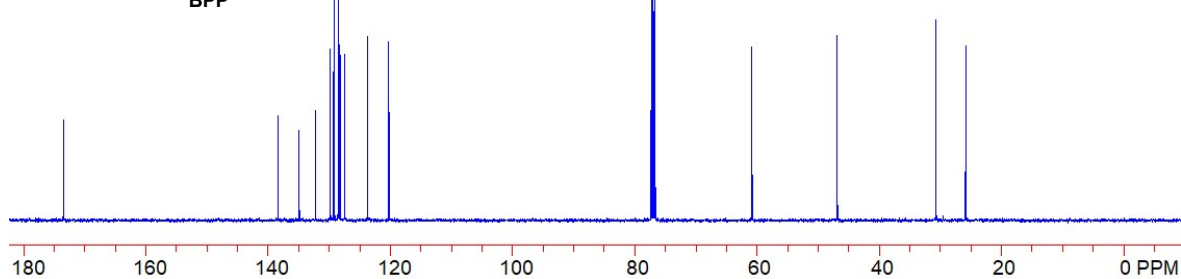

## SUPPORTING INFORMATION

### 3. Single Crystal Determination and Results

Single-crystal X-ray data of CPOC-302-Pro and CPOC-401-Pro were collected at 100.0(1) K on XtaLAB Synergy R, HyPix equipped with Hybrid Pixel Array detector. Data reduction was performed with CrysAlisPro package.<sup>S10</sup>

The structures of CPOC-302-Pro and CPOC-401-Pro were solved by *SHELXD*-2018 and *SHELXT*-2018, respectively, and the refinements were done by full-matrix least-squares on  $F^2$  (*SHELXL*-2018) with the graphical interface *Shelxle*.<sup>S11</sup> The atoms in the cage framework were refined anisotropically, including constraints, restraints and rigid bodies where necessary. H atoms attached to carbon, nitrogen, and hydroxyl oxygen atoms were positioned geometrically and constrained to ride on their parent atoms. The two crystals were weakly diffracting, immediately losing solvent after removal from the mother liquor. Hence, the quality of the data is far more than sufficient to locate the substituted group. Meanwhile, the structure features large solvent-accessible volumes within the cage. The contents of these volumes are highly disordered and the residual electron density peaks are not arranged in an interpretable pattern. Consequently, the *SQUEEZE* function<sup>S12</sup> of *PLATON* was employed to remove the contribution of the electron density, which gave a potential solvent-accessible void of 33021 and 18897 Å<sup>3</sup> per unit cell (a total of approximately 6593 and 2594 electrons). The resultant files were used in further refinement. The detailed crystal data and cell parameters are summarized in Table S3. The geometry optimized structures of CPOC-302-Pro and CPOC-401-Pro were modeled using CP2K software, and the overlay of the X-ray and GFN-xTB optimized structure by CP2K shows a remarkable agreement (Figure S15)

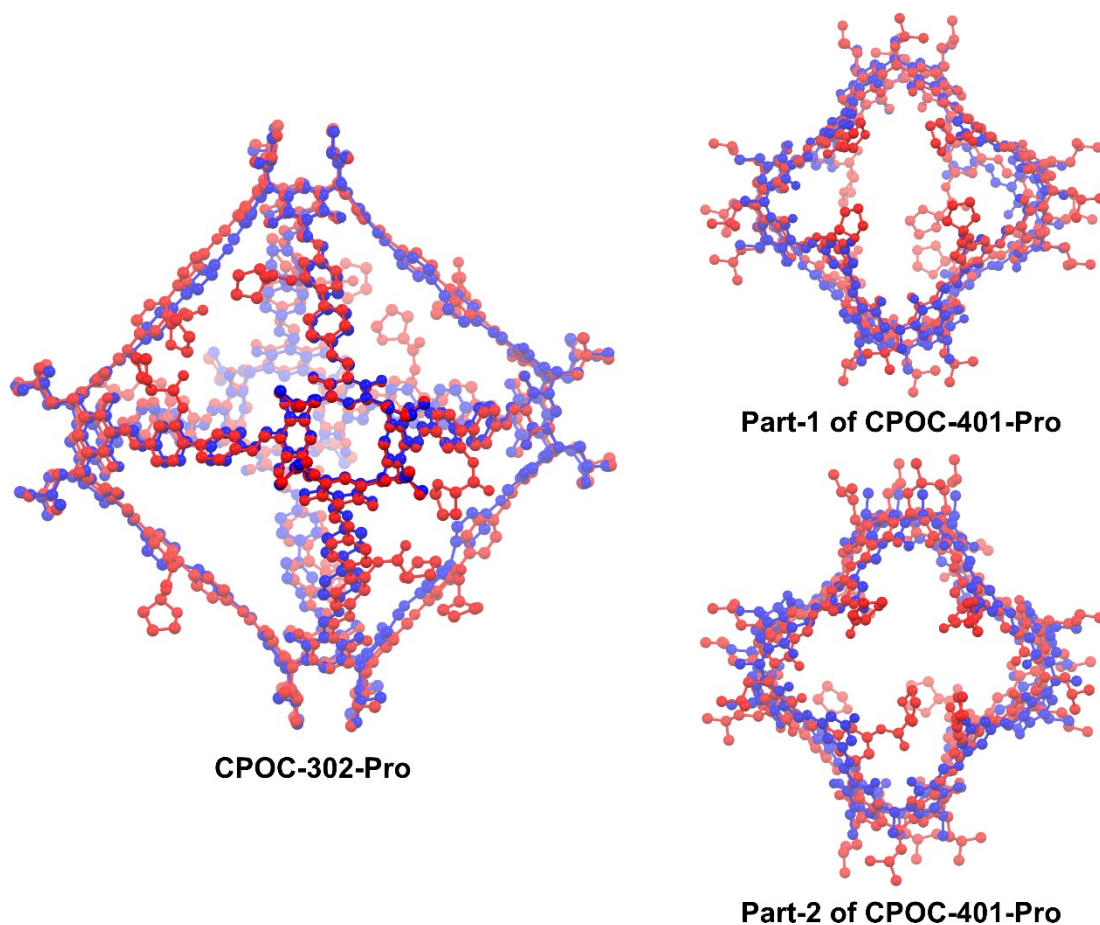

**Figure S22.** The overlapping image of the crystal structure (blue) and optimized structure (red) of CPOC-302-Pro and CPOC-401-Pro.

## SUPPORTING INFORMATION

**Table S4.** Crystal Data and Structural Refinement for CPOC-302-Pro and CPOC-401-Pro.

|                                                                           | <b>CPOC-302-Pro</b>                                               | <b>CPOC-401-Pro</b>                                               |
|---------------------------------------------------------------------------|-------------------------------------------------------------------|-------------------------------------------------------------------|
| <b>CCDC No.</b>                                                           | 2113144                                                           | 2113665                                                           |
| <b>Empirical formula</b>                                                  | C <sub>492</sub> H <sub>528</sub> N <sub>48</sub> O <sub>60</sub> | C <sub>280</sub> H <sub>320</sub> N <sub>32</sub> O <sub>40</sub> |
| <b>Formula weight</b>                                                     | 8073.59                                                           | 4773.66                                                           |
| <b>Temperature (K)</b>                                                    | 100.0(1)                                                          | 100.0(1)                                                          |
| <b>Wavelength (Å)</b>                                                     | 1.54184                                                           | 1.54184                                                           |
| <b>Crystal system</b>                                                     | trigonal                                                          | triclinic                                                         |
| <b>Space group</b>                                                        | <i>P</i> 3c1                                                      | <i>P</i> 1                                                        |
| <b><i>a</i> (Å)</b>                                                       | 32.5182(19)                                                       | 28.4101(12)                                                       |
| <b><i>b</i> (Å)</b>                                                       | 32.5182(19)                                                       | 30.2731(13)                                                       |
| <b><i>c</i> (Å)</b>                                                       | 51.424(4)                                                         | 32.7364(15)                                                       |
| <b><math>\alpha</math> (°)</b>                                            | 90                                                                | 82.444(4)                                                         |
| <b><math>\beta</math> (°)</b>                                             | 90                                                                | 81.795(4)                                                         |
| <b><math>\gamma</math> (°)</b>                                            | 120                                                               | 63.273(4)                                                         |
| <b>Volume (Å<sup>3</sup>)</b>                                             | 47092(7)                                                          | 24818(2)                                                          |
| <b>Z</b>                                                                  | 2                                                                 | 2                                                                 |
| <b>Calculated density (g cm<sup>-3</sup>)</b>                             | 0.569                                                             | 0.639                                                             |
| <b>Absorption coefficient (mm<sup>-1</sup>)</b>                           | 0.302                                                             | 0.347                                                             |
| <b><i>F</i><sub>000</sub></b>                                             | 8592                                                              | 5088                                                              |
| <b>Crystal size (mm<sup>3</sup>)</b>                                      | 0.10×0.05×0.03                                                    | 0.23×0.18×0.15                                                    |
| <b><math>\theta</math> range for data collection (°)</b>                  | 2.327 to 77.023 □                                                 | 2.075 to 78.085                                                   |
| <b>Reflections collected</b>                                              | 183245                                                            | 330746                                                            |
| <b>Independent reflections</b>                                            | 58296                                                             | 142785                                                            |
| <b>Max. and min. transmission</b>                                         | 0.92486 and 1.00000                                               | 0.87204 and 1.00000                                               |
| <b>Refinement method</b>                                                  | Full-matrix least-squares on <i>F</i> <sup>2</sup>                | Full-matrix least-squares on <i>F</i> <sup>2</sup>                |
| <b>Data / restraints / parameters</b>                                     | 58296 / 2020 / 1336                                               | 142785 / 15362 / 4273                                             |
| <b>Goodness-of-fit on <i>F</i><sup>2</sup></b>                            | 0.793                                                             | 1.377                                                             |
| <b>Final <i>R</i> indices [<i>I</i> □ 2<math>\sigma</math>(<i>I</i>)]</b> | <i>R</i> 1 = 0.1220, <i>wR</i> 2 = 0.2206                         | <i>R</i> 1 = 0.2292, <i>wR</i> 2 = 0.4808                         |
| <b><i>R</i> indices (all data)</b>                                        | <i>R</i> 1 = 0.4055, <i>wR</i> 2 = 0.3757                         | <i>R</i> 1 = 0.3500, <i>wR</i> 2 = 0.5579                         |
| <b>Largest diff. peak and hole (e Å<sup>-3</sup>)</b>                     | 0.309 and -0.157                                                  | 1.624 and -0.875                                                  |
| <b>Absolute structure parameter</b>                                       | 0.2(3)                                                            | 0.53(12)                                                          |

$${}^a R_1 = \sum ||F_o| - |F_c|| / \sum |F_o|. \quad {}^b wR_2 = \{ \sum [w(F_o^2 - F_c^2)^2] / \sum [w(F_o^2)^2] \}^{1/2}$$

## 4. Geometry Optimized Models

The initial structures of CPOC-302-Pro and CPOC-401-Pro were taken from their crystal structures and modified using Materials Studio to add the substituent group. The geometry optimizations were employed the GFN1-xTB method<sup>S13, S14</sup> with Grimme's D3 van der Waals dispersion correction using the CP2K code<sup>S15</sup>. GFN-xTB is a method of self-consistent, third-order, density functional tight-binding (DFTB3), suitable for the calculation of structures, vibrational frequencies, and non-covalent interactions in large molecular systems. (Only atomic coordinates of the periodic systems were optimized, and the cell parameters were fixed.) A convergence threshold of  $3.0 \times 10^{-6}$  Hartree was used for all self-consistent field (SCF) calculations. The structural optimizations were considered converged if the maximum force on all atoms falls below  $4.5 \times 10^{-4}$  Hartree Bohr<sup>-1</sup>.

## 5. References

- S1. M. Banerjee, S. Das, M. Yoon, H. J. Choi, M. H. Hyun, S. M. Park, G. Seo and K. Kim, *J. Am. Chem. Soc.*, 2009, **131**, 7524-7525.
- S2. D. Dang, P. Wu, C. He, Z. Xie and C. Duan, *J. Am. Chem. Soc.*, 2010, **132**, 14321-14323.
- S3. D. J. Lun, G. I. N. Waterhouse and S. G. Telfer, *J. Am. Chem. Soc.*, 2011, **133**, 5806-5809.
- S4. Y. Liu, X. Xi, C. Ye, T. Gong, Z. Yang and Y. Cui, *Angew. Chem. Int. Ed.*, 2014, **53**, 13821-13825.
- S5. C. Kutzscher, G. Nickerl, I. Senkowska, V. Bon and S. Kaskel, *Chem. Mater.*, 2016, **28**, 2573-2580.
- S6. W.-L. He, M. Zhao and C.-D. Wu, *Angew. Chem. Int. Ed.*, 2019, **58**, 168-172.
- S7. J. Zhang, X. Han, X. Wu, Y. Liu and Y. Cui, *J. Am. Chem. Soc.*, 2017, **139**, 8277-8285.
- S8. P. Chen, J.-S. Sun, L. Zhang, W.-Y. Ma, F. Sun and G. Zhu, *Sci. China Mater.*, 2019, **62**, 194-202.
- S9. X. Wu, C. He, X. Wu, S. Qu and C. Duan, *Chem. Commun.*, 2011, **47**, 8415-8417.
- S10. Rigaku OD, CrysAlisPro V1.171.42.25a, 2021.
- S11. G. M. Sheldrick, Crystal structure refinement with SHELXL. *Acta crystallogr. Section C*, **2015**, *71*, 3-8.
- S12. A. L. Spek, PLATON SQUEEZE: a tool for the calculation of the disordered solvent contribution to the calculated structure factors. *Acta crystallogr. Section C*, **2015**, *71*, 9-18
- S13. C. Bannwarth, E. Caldeweyher, S. Ehlert, A. Hansen, P. Pracht, J. Seibert, S. Spicher, S. Grimme, Extended tight-binding quantum chemistry methods. *WIREs Comput. Mol. Sci.*, **2020**, *11*, e1493
- S14. S. Grimme, C. Bannwarth, P. Shushkov, A Robust and Accurate Tight-Binding Quantum Chemical Method for Structures, Vibrational Frequencies, and Noncovalent Interactions of Large Molecular Systems Parametrized for All spd-Block Elements ( $Z = 1-86$ ) *J. Chem. Theory Comput.*, **2017**, *13*, 1989-2009.
- S15. T. D. Kühne, M. Iannuzzi, M. D. Ben, V. V. Rybkin, P. Seewald, F. Stein, T. Laino, R. Z. Khaliullin, O. Schütt, F. Schiffmann, D. Golze, J. Wilhelm, S. Chulkov, M. H. Bani-Hashemian, V. Weber, U. Borstnik, M. Taillefumier, A. S. Jakobovits, A. Lazzaro, H. Pabst, T. Müller, R. Schade, M. Guidon, S. Andermatt, N. Holmberg, G. K. Schenter, A. Hehn, A. Bussy, F. Belleflamme, G. Tabacchi, A. Glöß, M. Lass, I. Bethune, C. J. Mundy, C. Plessl, M. Watkins, J. VandeVondele, M. Krack, and J. Hutter., CP2K: An electronic structure and molecular dynamics software package - Quickstep: Efficient and accurate electronic structure calculations *J. Chem. Phys.*, **2020**, *152*, 194103
